# Supplementary material for: Decoding Neuromuscular Disorders Using Phenotypic Clusters Obtained From Co-Occurrence Networks
Source: Front Mol Biosci. 2021 Apr 19;8:635074. doi: 10.3389/fmolb.2021.635074 (PMC8147726; doi:10.3389/fmolb.2021.635074)
Supplement: Supplementary file 1 [file DataSheet1.zip]

Archive with 14 entries (14 files):
- SupplMaterial-legends.pdf
- __MACOSX/._SupplMaterial-legends.pdf
- Sup1-omim_report.html
- __MACOSX/._Sup1-omim_report.html
- Sup2-orphanet_report.html
- __MACOSX/._Sup2-orphanet_report.html
- Sup3-OMIM_phenotypes.csv
- __MACOSX/._Sup3-OMIM_phenotypes.csv
- Sup4-Orphanet_phenotypes.csv
- __MACOSX/._Sup4-Orphanet_phenotypes.csv
- Sup5-Top10_phenotypes.pdf
- __MACOSX/._Sup5-Top10_phenotypes.pdf
- Sup6-Venn-functions.pdf
- __MACOSX/._Sup6-Venn-functions.pdf
