# Supplementary material for: Decoding Neuromuscular Disorders Using Phenotypic Clusters Obtained From Co-Occurrence Networks
Source: Front Mol Biosci. 2021 Apr 19;8:635074. doi: 10.3389/fmolb.2021.635074 (PMC8147726; doi:10.3389/fmolb.2021.635074)
Supplement: Supplementary file 1 [file DataSheet1.zip › Sup3-OMIM_phenotypes.csv]

HPO	Phenotype description	NMD counts	Non-NMD counts	P-value
HP:0003236	Elevated serum creatine kinase	124	59	1.84109921505737e-96
HP:0001284	Areflexia	110	58	2.16269527168047e-82
HP:0001265	Hyporeflexia	117	100	4.68663270246321e-74
HP:0002460	Distal muscle weakness	81	18	3.01490057272535e-73
HP:0003701	Proximal muscle weakness	73	20	2.36991156348996e-63
HP:0002936	Distal sensory impairment	74	29	2.76116609118576e-59
HP:0003560	Muscular dystrophy	60	7	5.01881249757121e-59
HP:0003693	Distal amyotrophy	72	27	2.75654786444958e-58
HP:0003677	Slow progression	90	85	8.98171884726742e-54
HP:0010628	Facial palsy	63	34	4.81895199896009e-46
HP:0001761	Pes cavus	79	91	9.69732268094002e-43
HP:0003431	Decreased motor nerve conduction velocity	39	8	1.23764249220283e-35
HP:0009027	Foot dorsiflexor weakness	39	8	1.23764249220283e-35
HP:0002747	Respiratory insufficiency due to muscle weakness	39	10	2.77954200150767e-34
HP:0003391	Gowers sign	35	5	1.01344779880143e-33
HP:0003376	Steppage gait	34	7	3.92601684395236e-31
HP:0003198	Myopathy	47	39	1.6378664275598e-29
HP:0003202	Skeletal muscle atrophy	58	76	3.26096670668112e-29
HP:0007354	Amyotrophic lateral sclerosis	27	1	5.09899055472566e-29
HP:0003388	Easy fatigability	27	4	4.54718041342743e-26
HP:0003306	Spinal rigidity	23	1	1.22034772276634e-24
HP:0002355	Difficulty walking	39	33	2.04034053215539e-24
HP:0001270	Motor delay	76	190	2.94391718067302e-24
HP:0003380	Decreased number of peripheral myelinated nerve fibers	23	2	1.41195450099006e-23
HP:0001324	Muscle weakness	54	95	1.00855319638794e-22
HP:0007269	Spinal muscular atrophy	21	1	1.84375404794479e-22
HP:0003690	Limb muscle weakness	25	7	6.47414553936722e-22
HP:0003805	Rimmed vacuoles	20	1	2.25177117173473e-21
HP:0002093	Respiratory insufficiency	49	83	3.3387798284842e-21
HP:0001371	Flexion contracture	57	122	9.23027102274298e-21
HP:0001765	Hammertoe	26	11	9.335863302293e-21
HP:0000467	Neck muscle weakness	23	6	1.64098457134436e-20
HP:0003551	Difficulty climbing stairs	18	0	1.88357419260146e-20
HP:0003557	Increased variability in muscle fiber diameter	20	3	1.62680669060865e-19
HP:0007126	Proximal amyotrophy	18	1	3.31259177430614e-19
HP:0001558	Decreased fetal movement	34	39	1.11911696427856e-18
HP:0003394	Muscle spasm	25	14	1.68956422166915e-18
HP:0003691	Scapular winging	25	14	1.68956422166915e-18
HP:0003324	Generalized muscle weakness	24	12	2.11145871719793e-18
HP:0003458	EMG: myopathic abnormalities	22	8	2.22595102095272e-18
HP:0002380	Fasciculations	23	10	2.34688173450685e-18
HP:0003741	Congenital muscular dystrophy	16	0	3.0347935594588e-18
HP:0008981	Calf muscle hypertrophy	18	2	3.06620305442618e-18
HP:0009046	Difficulty running	17	1	3.98822538564658e-18
HP:0003445	EMG: neuropathic changes	17	2	3.50724381554826e-17
HP:0008180	Mildly elevated creatine kinase	17	2	3.50724381554826e-17
HP:0003307	Hyperlordosis	27	26	2.57710554136344e-16
HP:0001283	Bulbar palsy	19	7	5.66163487015398e-16
HP:0003383	Onion bulb formation	20	9	5.78373883140459e-16
HP:0002515	Waddling gait	28	32	1.33180431915455e-15
HP:0000602	Ophthalmoplegia	22	15	2.07225148063332e-15
HP:0003581	Adult onset	41	89	5.49441815129209e-15
HP:0002015	Dysphagia	50	136	6.73009874542771e-15
HP:0003798	Nemaline bodies	14	1	6.73111003996813e-15
HP:0009830	Peripheral neuropathy	27	32	8.06195054425721e-15
HP:0003326	Myalgia	24	25	3.90185221648538e-14
HP:0002650	Scoliosis	79	347	4.28589851449226e-13
HP:0006829	Severe muscular hypotonia	22	24	8.70293525508126e-13
HP:0007260	Type II lissencephaly	12	1	9.23632508996346e-13
HP:0003378	Axonal degeneration/regeneration	11	0	9.61400086078037e-13
HP:0003547	Shoulder girdle muscle weakness	11	0	9.61400086078037e-13
HP:0000508	Ptosis	57	207	2.19534077894804e-12
HP:0003687	Centrally nucleated skeletal muscle fibers	13	3	2.71601067725122e-12
HP:0003477	Peripheral axonal neuropathy	22	27	4.34627568238369e-12
HP:0003484	Upper limb muscle weakness	11	1	1.06933014981639e-11
HP:0002398	Degeneration of anterior horn cells	10	0	1.2026789965696e-11
HP:0003473	Fatigable weakness	10	0	1.2026789965696e-11
HP:0003803	Type 1 muscle fiber predominance	10	0	1.2026789965696e-11
HP:0003828	Variable expressivity	60	246	4.10901517138549e-11
HP:0003676	Progressive	55	213	4.68519881780885e-11
HP:0002366	Abnormal lower motor neuron morphology	11	2	6.4426480938585e-11
HP:0009025	Increased connective tissue	11	2	6.4426480938585e-11
HP:0001771	Achilles tendon contracture	12	4	1.02867859169801e-10
HP:0001271	Polyneuropathy	19	23	1.1163684732604e-10
HP:0003481	Segmental peripheral demyelination/remyelination	10	1	1.22680688761876e-10
HP:0001178	Ulnar claw	9	0	1.50117522945314e-10
HP:0003722	Neck flexor weakness	9	0	1.50117522945314e-10
HP:0003749	Pelvic girdle muscle weakness	9	0	1.50117522945314e-10
HP:0040078	Axonal degeneration	12	5	3.24088636593982e-10
HP:0003621	Juvenile onset	28	64	3.48340945628666e-10
HP:0001319	Neonatal hypotonia	30	76	5.82759595513404e-10
HP:0003715	Myofibrillar myopathy	8	0	1.86961270764344e-09
HP:0002522	Areflexia of lower limbs	10	3	2.74325477221993e-09
HP:0003712	Skeletal muscle hypertrophy	11	5	2.87375183402521e-09
HP:0002058	Myopathic facies	15	16	3.37061018899396e-09
HP:0002600	Hyporeflexia of lower limbs	9	2	7.10907455926188e-09
HP:0003555	Muscle fiber splitting	9	2	7.10907455926188e-09
HP:0000764	Peripheral axonal degeneration	8	1	1.56255741852284e-08
HP:0003554	Type 2 muscle fiber atrophy	8	1	1.56255741852284e-08
HP:0002792	Reduced vital capacity	7	0	2.32334125923461e-08
HP:0000597	Ophthalmoparesis	9	3	2.63884453618062e-08
HP:0003325	Limb-girdle muscle weakness	9	3	2.63884453618062e-08
HP:0000763	Sensory neuropathy	12	11	4.48517875438886e-08
HP:0002145	Frontotemporal dementia	10	6	6.12809518837146e-08
HP:0003700	Generalized amyotrophy	12	12	8.31370231866008e-08
HP:0001171	Split hand	14	19	9.24280355938211e-08
HP:0001638	Cardiomyopathy	22	55	1.01980388366491e-07
HP:0002359	Frequent falls	13	16	1.21887809817471e-07
HP:0003724	Shoulder girdle muscle atrophy	7	1	1.72780011785265e-07
HP:0009053	Distal lower limb muscle weakness	7	1	1.72780011785265e-07
HP:0001612	Weak cry	9	5	2.06823953694282e-07
HP:0003403	EMG: decremental response of compound muscle action potential to repetitive nerve stimulation	6	0	2.88083199679737e-07
HP:0003707	Calf muscle pseudohypertrophy	6	0	2.88083199679737e-07
HP:0006121	Acral ulceration	6	0	2.88083199679737e-07
HP:0008994	Proximal muscle weakness in lower limbs	6	0	2.88083199679737e-07
HP:0003674	Onset	11	11	2.94707385813498e-07
HP:0003552	Muscle stiffness	9	6	4.79895206456715e-07
HP:0003546	Exercise intolerance	16	32	5.82705010566075e-07
HP:0007973	Retinal dysplasia	8	4	6.88467991720336e-07
HP:0002878	Respiratory failure	17	38	8.72828662144277e-07
HP:0003390	Sensory axonal neuropathy	10	10	1.04676498811664e-06
HP:0003444	EMG: chronic denervation signs	6	1	1.87718192220408e-06
HP:0001308	Tongue fasciculations	9	8	2.00819387450801e-06
HP:0002486	Myotonia	7	3	2.24010416424142e-06
HP:0003387	Decreased number of large peripheral myelinated nerve fibers	7	3	2.24010416424142e-06
HP:0003327	Axial muscle weakness	5	0	3.56425610295884e-06
HP:0030046	Hypoglycosylation of alpha-dystroglycan	5	0	3.56425610295884e-06
HP:0032341	Reduced forced vital capacity	5	0	3.56425610295884e-06
HP:0003447	Axonal loss	8	6	3.60380408120773e-06
HP:0040083	Toe walking	8	6	3.60380408120773e-06
HP:0003678	Rapidly progressive	13	25	4.90040191269261e-06
HP:0002350	Cerebellar cyst	7	4	5.7278936035716e-06
HP:0001760	Abnormality of the foot	13	26	6.81245564053437e-06
HP:0003470	Paralysis	8	7	7.17398565235171e-06
HP:0007141	Sensorimotor neuropathy	10	15	1.27311730788345e-05
HP:0003737	Mitochondrial myopathy	7	5	1.27830894601634e-05
HP:0001349	Facial diplegia	8	8	1.33298577709387e-05
HP:0001288	Gait disturbance	20	67	1.55398046508351e-05
HP:0000218	High palate	47	264	1.83492737023286e-05
HP:0002111	Restrictive deficit on pulmonary function testing	6	3	1.95255218736108e-05
HP:0003382	Hypertrophic nerve changes	5	1	1.99451206193544e-05
HP:0006785	Limb-girdle muscular dystrophy	5	1	1.99451206193544e-05
HP:0001425	Heterogeneous	34	166	2.48568818516227e-05
HP:0007033	Cerebellar dysplasia	7	6	2.57569091539538e-05
HP:0003384	Peripheral axonal atrophy	4	0	4.40015902234323e-05
HP:0003697	Scapuloperoneal amyotrophy	4	0	4.40015902234323e-05
HP:0004336	Myelin outfoldings	4	0	4.40015902234323e-05
HP:0006984	Distal sensory loss of all modalities	4	0	4.40015902234323e-05
HP:0020152	Distal joint laxity	4	0	4.40015902234323e-05
HP:0011463	Childhood onset	14	38	4.68467930694551e-05
HP:0002378	Hand tremor	5	2	6.51149673622301e-05
HP:0007021	Pain insensitivity	5	2	6.51149673622301e-05
HP:0007182	Peripheral hypomyelination	5	2	6.51149673622301e-05
HP:0003474	Sensory impairment	6	5	9.31245542385766e-05
HP:0000544	External ophthalmoplegia	8	12	9.7264043147992e-05
HP:0003200	Ragged-red muscle fibers	8	12	9.7264043147992e-05
HP:0002804	Arthrogryposis multiplex congenita	16	53	9.89589191698149e-05
HP:0003738	Exercise-induced myalgia	5	3	0.000161989266876846
HP:0001427	Mitochondrial inheritance	6	6	0.00017346601901699
HP:0031882	Agyria	6	6	0.00017346601901699
HP:0002661	Painless fractures due to injury	4	1	0.000205750926705326
HP:0002877	Nocturnal hypoventilation	4	1	0.000205750926705326
HP:0009130	Hand muscle atrophy	4	1	0.000205750926705326
HP:0002754	Osteomyelitis	7	10	0.000218518348642737
HP:0011675	Arrhythmia	12	34	0.000226428939380303
HP:0003128	Lactic acidosis	20	85	0.000258313092390146
HP:0008944	Distal lower limb amyotrophy	5	4	0.00034006894813089
HP:0001069	Episodic hyperhidrosis	3	0	0.000542024339426888
HP:0003402	Decreased miniature endplate potentials	3	0	0.000542024339426888
HP:0003443	Decreased size of nerve terminals	3	0	0.000542024339426888
HP:0003752	Episodic flaccid weakness	3	0	0.000542024339426888
HP:0003810	Late-onset distal muscle weakness	3	0	0.000542024339426888
HP:0006937	Impaired distal tactile sensation	3	0	0.000542024339426888
HP:0008956	Proximal lower limb amyotrophy	3	0	0.000542024339426888
HP:0008988	Pelvic girdle muscle atrophy	3	0	0.000542024339426888
HP:0009055	Generalized limb muscle atrophy	3	0	0.000542024339426888
HP:0009063	Progressive distal muscle weakness	3	0	0.000542024339426888
HP:0010548	Percussion myotonia	3	0	0.000542024339426888
HP:0100299	Muscle fiber inclusion bodies	3	0	0.000542024339426888
HP:0001604	Vocal cord paresis	4	2	0.00057736253887727
HP:0002127	Abnormal upper motor neuron morphology	5	5	0.000634684247824114
HP:0003323	Progressive muscle weakness	6	9	0.000759625119520934
HP:0003577	Congenital onset	38	240	0.000944219350958457
HP:0000762	Decreased nerve conduction velocity	8	19	0.00102811320968872
HP:0002483	Bulbar signs	4	3	0.00126035930089733
HP:0004326	Cachexia	4	3	0.00126035930089733
HP:0006886	Impaired distal vibration sensation	4	3	0.00126035930089733
HP:0007002	Motor axonal neuropathy	4	3	0.00126035930089733
HP:0002751	Kyphoscoliosis	17	78	0.00153382017360622
HP:0001644	Dilated cardiomyopathy	17	79	0.00172724040062869
HP:0001155	Abnormality of the hand	5	7	0.0017377825449514
HP:0002803	Congenital contracture	5	7	0.0017377825449514
HP:0003450	Axonal regeneration	3	1	0.00203609258703726
HP:0003457	EMG abnormality	3	1	0.00203609258703726
HP:0003704	Scapuloperoneal weakness	3	1	0.00203609258703726
HP:0003736	Autophagic vacuoles	3	1	0.00203609258703726
HP:0006597	Diaphragmatic paralysis	3	1	0.00203609258703726
HP:0007267	Chronic axonal neuropathy	3	1	0.00203609258703726
HP:0007460	Autoamputation of digits	3	1	0.00203609258703726
HP:0000975	Hyperhidrosis	8	22	0.00217976212308436
HP:0002421	Poor head control	9	28	0.00234529527775705
HP:0011096	Peripheral demyelination	7	17	0.00235105626150216
HP:0006958	Abnormal auditory evoked potentials	4	4	0.0023587293349178
HP:0008972	Decreased activity of mitochondrial respiratory chain	4	4	0.0023587293349178
HP:0006466	Ankle flexion contracture	5	8	0.00263635049337664
HP:0008872	Feeding difficulties in infancy	18	91	0.00287074013610803
HP:0012378	Fatigue	7	18	0.00304002465150853
HP:0003593	Infantile onset	51	378	0.00330275091019598
HP:0001533	Slender build	5	9	0.00382921371891685
HP:0002033	Poor suck	6	14	0.00413702159926499
HP:0003201	Rhabdomyolysis	6	14	0.00413702159926499
HP:0001260	Dysarthria	39	273	0.00426302538894168
HP:0003713	Muscle fiber necrosis	3	2	0.00478160507753516
HP:0004389	Intestinal pseudo-obstruction	3	2	0.00478160507753516
HP:0007178	Motor polyneuropathy	3	2	0.00478160507753516
HP:0009113	Diaphragmatic weakness	3	2	0.00478160507753516
HP:0002500	Abnormality of the cerebral white matter	7	21	0.00604612275548829
HP:0000522	Alacrima	4	6	0.00619963990869614
HP:0001605	Vocal cord paralysis	4	6	0.00619963990869614
HP:0002403	Positive Romberg sign	4	6	0.00619963990869614
HP:0011968	Feeding difficulties	33	226	0.00624100326405659
HP:0002365	Hypoplasia of the brainstem	10	40	0.00626250887859622
HP:0001218	Autoamputation	2	0	0.00666227547063334
HP:0001868	Autoamputation of foot	2	0	0.00666227547063334
HP:0001886	Foot osteomyelitis	2	0	0.00666227547063334
HP:0001963	Abnormal speech discrimination	2	0	0.00666227547063334
HP:0002292	Frontal balding	2	0	0.00666227547063334
HP:0002601	Paresis of extensor muscles of the big toe	2	0	0.00666227547063334
HP:0002821	Neuropathic arthropathy	2	0	0.00666227547063334
HP:0002882	Sudden episodic apnea	2	0	0.00666227547063334
HP:0003397	Generalized hypotonia due to defect at the neuromuscular junction	2	0	0.00666227547063334
HP:0003435	Cold-induced hand cramps	2	0	0.00666227547063334
HP:0003436	Prolonged miniature endplate currents	2	0	0.00666227547063334
HP:0003449	Cold-induced muscle cramps	2	0	0.00666227547063334
HP:0003719	Muscle mounding	2	0	0.00666227547063334
HP:0003730	EMG: myotonic runs	2	0	0.00666227547063334
HP:0003731	Quadriceps muscle weakness	2	0	0.00666227547063334
HP:0003733	Thigh hypertrophy	2	0	0.00666227547063334
HP:0003740	Myotonia with warm-up phenomenon	2	0	0.00666227547063334
HP:0003787	Type 1 and type 2 muscle fiber minicore regions	2	0	0.00666227547063334
HP:0003791	Deposits immunoreactive to beta-amyloid protein	2	0	0.00666227547063334
HP:0004463	Absent brainstem auditory responses	2	0	0.00666227547063334
HP:0005010	Osteomyelitis leading to amputation due to slow healing fractures	2	0	0.00666227547063334
HP:0007107	Segmental peripheral demyelination	2	0	0.00666227547063334
HP:0007149	Distal upper limb amyotrophy	2	0	0.00666227547063334
HP:0007230	Decreased distal sensory nerve action potential	2	0	0.00666227547063334
HP:0008443	Spinal deformities	2	0	0.00666227547063334
HP:0008529	Absence of acoustic reflex	2	0	0.00666227547063334
HP:0008756	Bowing of the vocal cords	2	0	0.00666227547063334
HP:0008945	Loss of ability to walk in early childhood	2	0	0.00666227547063334
HP:0008948	Proximal upper limb amyotrophy	2	0	0.00666227547063334
HP:0008955	Progressive distal muscular atrophy	2	0	0.00666227547063334
HP:0008970	Scapulohumeral muscular dystrophy	2	0	0.00666227547063334
HP:0009005	Weakness of the intrinsic hand muscles	2	0	0.00666227547063334
HP:0009054	Scapuloperoneal myopathy	2	0	0.00666227547063334
HP:0009129	Upper limb amyotrophy	2	0	0.00666227547063334
HP:0009588	Vestibular Schwannoma	2	0	0.00666227547063334
HP:0011349	Abducens palsy	2	0	0.00666227547063334
HP:0011808	Decreased patellar reflex	2	0	0.00666227547063334
HP:0012246	Oculomotor nerve palsy	2	0	0.00666227547063334
HP:0012548	Fatty replacement of skeletal muscle	2	0	0.00666227547063334
HP:0012847	Epilepsia partialis continua	2	0	0.00666227547063334
HP:0012899	Handgrip myotonia	2	0	0.00666227547063334
HP:0025605	Lid lag on downgaze	2	0	0.00666227547063334
HP:0030237	Hand muscle weakness	2	0	0.00666227547063334
HP:0030664	Beevor's sign	2	0	0.00666227547063334
HP:0100297	Increased endomysial connective tissue	2	0	0.00666227547063334
HP:0100303	Muscle fiber cytoplasmatic inclusion bodies	2	0	0.00666227547063334
HP:0012110	Hypoplasia of the pons	6	16	0.00692369864968178
HP:0001762	Talipes equinovarus	28	184	0.00703314542135831
HP:0002715	Abnormality of the immune system	5	11	0.00728742235297818
HP:0001611	Nasal speech	7	22	0.00742300411885732
HP:0001962	Palpitations	7	22	0.00742300411885732
HP:0002134	Abnormality of the basal ganglia	3	3	0.00898584761619303
HP:0002411	Myokymia	3	3	0.00898584761619303
HP:0003438	Absent Achilles reflex	3	3	0.00898584761619303
HP:0003768	Periodic paralysis	3	3	0.00898584761619303
HP:0007108	Demyelinating peripheral neuropathy	3	3	0.00898584761619303
HP:0007941	Limited extraocular movements	3	3	0.00898584761619303
HP:0002922	Increased CSF protein	5	12	0.00964425249552948
HP:0007340	Lower limb muscle weakness	8	30	0.0102246917399638
HP:0000970	Anhidrosis	5	13	0.012476577921615
HP:0010307	Stridor	4	8	0.0128137022330406
HP:0002047	Malignant hyperthermia	3	4	0.0147799638526648
HP:0003548	Subsarcolemmal accumulations of abnormally shaped mitochondria	3	4	0.0147799638526648
HP:0012804	Corneal ulceration	3	4	0.0147799638526648
HP:0001302	Pachygyria	10	47	0.0157726397311374
HP:0001252	Muscular hypotonia	32	236	0.0175184430220311
HP:0000224	Decreased taste sensation	2	1	0.0189027777330463
HP:0000576	Centrocecal scotoma	2	1	0.0189027777330463
HP:0000759	Abnormal peripheral nervous system morphology	2	1	0.0189027777330463
HP:0002579	Gastrointestinal dysmotility	2	1	0.0189027777330463
HP:0002872	Apneic episodes precipitated by illness, fatigue, stress	2	1	0.0189027777330463
HP:0003115	Abnormal EKG	2	1	0.0189027777330463
HP:0003392	First dorsal interossei muscle weakness	2	1	0.0189027777330463
HP:0003400	Basal lamina onion bulb formation	2	1	0.0189027777330463
HP:0003426	First dorsal interossei muscle atrophy	2	1	0.0189027777330463
HP:0003427	Thenar muscle weakness	2	1	0.0189027777330463
HP:0003434	Sensory ataxic neuropathy	2	1	0.0189027777330463
HP:0005348	Inspiratory stridor	2	1	0.0189027777330463
HP:0006999	Basal ganglia gliosis	2	1	0.0189027777330463
HP:0007103	Hypointensity of cerebral white matter on MRI	2	1	0.0189027777330463
HP:0008000	Decreased corneal reflex	2	1	0.0189027777330463
HP:0008967	Exercise-induced muscle stiffness	2	1	0.0189027777330463
HP:0009072	Decreased Achilles reflex	2	1	0.0189027777330463
HP:0100295	Muscle fiber atrophy	2	1	0.0189027777330463
HP:0200147	Neuronal loss in basal ganglia	2	1	0.0189027777330463
HP:0001649	Tachycardia	6	21	0.0194034248538859
HP:0000590	Progressive external ophthalmoplegia	5	15	0.0197184165223408
HP:0003448	Decreased sensory nerve conduction velocity	3	5	0.022232704563313
HP:0003710	Exercise-induced muscle cramps	3	5	0.022232704563313
HP:0005162	Left ventricular dysfunction	3	5	0.022232704563313
HP:0000557	Buphthalmos	4	10	0.022740072054481
HP:0001618	Dysphonia	4	10	0.022740072054481
HP:0001639	Hypertrophic cardiomyopathy	14	82	0.0230302293687178
HP:0000741	Apathy	5	16	0.0241929054155389
HP:0002938	Lumbar hyperlordosis	8	37	0.0273286810270735
HP:0001321	Cerebellar hypoplasia	20	136	0.0279842729302274
HP:0001188	Hand clenching	4	11	0.0290586407947959
HP:0000559	Corneal scarring	3	6	0.0313622280227959
HP:0001992	Organic aciduria	3	6	0.0313622280227959
HP:0002385	Paraparesis	3	6	0.0313622280227959
HP:0003418	Back pain	3	6	0.0313622280227959
HP:0004395	Malnutrition	3	6	0.0313622280227959
HP:0006957	Loss of ability to walk	3	6	0.0313622280227959
HP:0009110	Diaphragmatic eventration	3	6	0.0313622280227959
HP:0001291	Abnormal cranial nerve morphology	2	2	0.0357694628790553
HP:0003044	Shoulder flexion contracture	2	2	0.0357694628790553
HP:0003219	Ethylmalonic aciduria	2	2	0.0357694628790553
HP:0007240	Progressive gait ataxia	2	2	0.0357694628790553
HP:0008322	Abnormal mitochondrial morphology	2	2	0.0357694628790553
HP:0012211	Abnormal renal physiology	2	2	0.0357694628790553
HP:0100614	Myositis	2	2	0.0357694628790553
HP:0000518	Cataract	26	196	0.0375363999903941
HP:0001414	Microvesicular hepatic steatosis	3	7	0.04214619435741
HP:0001924	Sideroblastic anemia	3	7	0.04214619435741
HP:0002913	Myoglobinuria	3	7	0.04214619435741
HP:0003688	Cytochrome C oxidase-negative muscle fibers	3	7	0.04214619435741
HP:0009771	Osteolytic defects of the phalanges of the hand	3	7	0.04214619435741
HP:0000158	Macroglossia	9	49	0.0439015223240226
HP:0002375	Hypokinesia	4	13	0.0445223170281831
HP:0000007	Autosomal recessive inheritance	248	2581	0.0478927886233202
HP:0002021	Pyloric stenosis	5	20	0.0483186084908132
HP:0002490	Increased CSF lactate	5	20	0.0483186084908132
HP:0001561	Polyhydramnios	14	92	0.0484673384606012
HP:0000495	Recurrent corneal erosions	3	8	0.0545303688650598
HP:0000836	Hyperthyroidism	3	8	0.0545303688650598
HP:0001883	Talipes	3	8	0.0545303688650598
HP:0007502	Follicular hyperkeratosis	3	8	0.0545303688650598
HP:0002151	Increased serum lactate	14	94	0.0552755336244052
HP:0000666	Horizontal nystagmus	5	21	0.055972182972119
HP:0003273	Hip contracture	5	21	0.055972182972119
HP:0002189	Excessive daytime sleepiness	2	3	0.0564280347467353
HP:0002578	Gastroparesis	2	3	0.0564280347467353
HP:0003121	Limb joint contracture	2	3	0.0564280347467353
HP:0007210	Lower limb amyotrophy	2	3	0.0564280347467353
HP:0009023	Abdominal wall muscle weakness	2	3	0.0564280347467353
HP:0012473	Tongue atrophy	2	3	0.0564280347467353
HP:0002910	Elevated hepatic transaminase	15	106	0.066742764907846
HP:0000659	Peters anomaly	3	9	0.0684359244090661
HP:0012332	Abnormal autonomic nervous system physiology	4	16	0.0747865905436282
HP:0000980	Pallor	6	31	0.0768621172611058
HP:0001262	Excessive daytime somnolence	2	4	0.0801491283120064
HP:0002346	Head tremor	2	4	0.0801491283120064
HP:0002527	Falls	2	4	0.0801491283120064
HP:0002572	Episodic vomiting	2	4	0.0801491283120064
HP:0003393	Thenar muscle atrophy	2	4	0.0801491283120064
HP:0011947	Respiratory tract infection	2	4	0.0801491283120064
HP:0030319	Weakness of facial musculature	2	4	0.0801491283120064
HP:0000615	Abnormal pupil morphology	1	0	0.0817113123915976
HP:0001112	Leber optic atrophy	1	0	0.0817113123915976
HP:0001384	Abnormality of the hip joint	1	0	0.0817113123915976
HP:0001430	Abnormality of the calf musculature	1	0	0.0817113123915976
HP:0001757	High-frequency sensorineural hearing impairment	1	0	0.0817113123915976
HP:0002270	Abnormality of the autonomic nervous system	1	0	0.0817113123915976
HP:0002427	Motor aphasia	1	0	0.0817113123915976
HP:0002450	Abnormal motor neuron morphology	1	0	0.0817113123915976
HP:0003405	Diffuse axonal swelling	1	0	0.0817113123915976
HP:0003559	Muscle hyperirritability	1	0	0.0817113123915976
HP:0003755	Type 1 fibers relatively smaller than type 2 fibers	1	0	0.0817113123915976
HP:0003756	Skeletal myopathy	1	0	0.0817113123915976
HP:0003760	Percussion-induced rapid rolling muscle contractions	1	0	0.0817113123915976
HP:0003789	Minicore myopathy	1	0	0.0817113123915976
HP:0003797	Limb-girdle muscle atrophy	1	0	0.0817113123915976
HP:0004454	Abnormal middle ear reflexes	1	0	0.0817113123915976
HP:0004466	Prolonged brainstem auditory evoked potentials	1	0	0.0817113123915976
HP:0004878	Intercostal muscle weakness	1	0	0.0817113123915976
HP:0004887	Respiratory failure requiring assisted ventilation	1	0	0.0817113123915976
HP:0004889	Intermittent episodes of respiratory insufficiency due to muscle weakness	1	0	0.0817113123915976
HP:0004891	Recurrent infections due to aspiration	1	0	0.0817113123915976
HP:0004913	Intermittent lactic acidemia	1	0	0.0817113123915976
HP:0005072	Hyperextensibility at wrists	1	0	0.0817113123915976
HP:0005133	Right ventricular dilatation	1	0	0.0817113123915976
HP:0005147	Bidirectional ventricular ectopy	1	0	0.0817113123915976
HP:0005307	Postural hypotension with compensatory tachycardia	1	0	0.0817113123915976
HP:0005335	Sleepy facial expression	1	0	0.0817113123915976
HP:0005437	Recurrent infections in infancy and early childhood	1	0	0.0817113123915976
HP:0005478	Prominent frontal sinuses	1	0	0.0817113123915976
HP:0005750	Contractures of the joints of the lower limbs	1	0	0.0817113123915976
HP:0005775	Multiple skeletal anomalies	1	0	0.0817113123915976
HP:0005941	Intermittent hyperpnea at rest	1	0	0.0817113123915976
HP:0005946	Ventilator dependence with inability to wean	1	0	0.0817113123915976
HP:0005947	Decreased sensitivity to hypoxemia	1	0	0.0817113123915976
HP:0005991	Limited neck flexion	1	0	0.0817113123915976
HP:0006149	Increased laxity of fingers	1	0	0.0817113123915976
HP:0006203	Decreased movement range in interphalangeal joints	1	0	0.0817113123915976
HP:0006460	Increased laxity of ankles	1	0	0.0817113123915976
HP:0006473	Anterior bowing of long bones	1	0	0.0817113123915976
HP:0006499	Abnormality of femoral epiphysis	1	0	0.0817113123915976
HP:0006581	Depletion of mitochondrial DNA in liver	1	0	0.0817113123915976
HP:0006582	Reye syndrome-like episodes	1	0	0.0817113123915976
HP:0006825	Pallor of dorsal columns of the spinal cord	1	0	0.0817113123915976
HP:0006850	Hypoplasia of the ventral pons	1	0	0.0817113123915976
HP:0006888	Meningoencephalocele	1	0	0.0817113123915976
HP:0006915	Inability to walk by childhood/adolescence	1	0	0.0817113123915976
HP:0006916	Intraaxonal accumulation of curvilinear autofluorescent lipopigment storage material	1	0	0.0817113123915976
HP:0006964	Cerebral cortical neurodegeneration	1	0	0.0817113123915976
HP:0007054	Hyperreflexia proximally	1	0	0.0817113123915976
HP:0007112	Temporal cortical atrophy	1	0	0.0817113123915976
HP:0007117	Corticospinal tract atrophy	1	0	0.0817113123915976
HP:0007131	Acute demyelinating polyneuropathy	1	0	0.0817113123915976
HP:0007208	Irregular myelin loops	1	0	0.0817113123915976
HP:0007215	Periodic hyperkalemic paralysis	1	0	0.0817113123915976
HP:0007233	Clusters of axonal regeneration	1	0	0.0817113123915976
HP:0007249	Decreased number of small peripheral myelinated nerve fibers	1	0	0.0817113123915976
HP:0007289	Limb fasciculations	1	0	0.0817113123915976
HP:0007344	Atrophy/Degeneration involving the spinal cord	1	0	0.0817113123915976
HP:0007348	Hypoplasia of the pyramidal tract	1	0	0.0817113123915976
HP:0007695	Abnormal pupillary light reflex	1	0	0.0817113123915976
HP:0007738	Uncontrolled eye movements	1	0	0.0817113123915976
HP:0007740	Long eyelashes in irregular rows	1	0	0.0817113123915976
HP:0007768	Central retinal vessel vascular tortuosity	1	0	0.0817113123915976
HP:0007770	Hypoplasia of the retina	1	0	0.0817113123915976
HP:0007838	Progressive ptosis	1	0	0.0817113123915976
HP:0007889	Iridescent posterior subcapsular cataract	1	0	0.0817113123915976
HP:0008045	Enlarged flash visual evoked potentials	1	0	0.0817113123915976
HP:0008116	Flexion limitation of toes	1	0	0.0817113123915976
HP:0008306	Abnormal iron deposition in mitochondria	1	0	0.0817113123915976
HP:0008335	Renal aminoaciduria	1	0	0.0817113123915976
HP:0008504	Moderate sensorineural hearing impairment	1	0	0.0817113123915976
HP:0008587	Mild neurosensory hearing impairment	1	0	0.0817113123915976
HP:0008946	Pelvic girdle amyotrophy	1	0	0.0817113123915976
HP:0008959	Distal upper limb muscle weakness	1	0	0.0817113123915976
HP:0008964	Nonprogressive muscular atrophy	1	0	0.0817113123915976
HP:0008968	Muscle hypertrophy of the lower extremities	1	0	0.0817113123915976
HP:0008997	Proximal muscle weakness in upper limbs	1	0	0.0817113123915976
HP:0009020	Exercise-induced muscle fatigue	1	0	0.0817113123915976
HP:0009031	Amyotrophy of ankle musculature	1	0	0.0817113123915976
HP:0009050	Quadriceps muscle atrophy	1	0	0.0817113123915976
HP:0009060	Scapular muscle atrophy	1	0	0.0817113123915976
HP:0009069	Lethal infantile mitochondrial myopathy	1	0	0.0817113123915976
HP:0009073	Progressive proximal muscle weakness	1	0	0.0817113123915976
HP:0009077	Weakness of long finger extensor muscles	1	0	0.0817113123915976
HP:0009109	Denervation of the diaphragm	1	0	0.0817113123915976
HP:0009126	Increased adipose tissue	1	0	0.0817113123915976
HP:0009141	Depletion of mitochondrial DNA in muscle tissue	1	0	0.0817113123915976
HP:0009831	Mononeuropathy	1	0	0.0817113123915976
HP:0010602	Type 2 muscle fiber predominance	1	0	0.0817113123915976
HP:0010663	Abnormality of thalamus morphology	1	0	0.0817113123915976
HP:0010991	Abnormal morphology of the abdominal musculature	1	0	0.0817113123915976
HP:0011285	Long-segment aganglionic megacolon	1	0	0.0817113123915976
HP:0011807	Type 1 muscle fiber atrophy	1	0	0.0817113123915976
HP:0011809	Paradoxical myotonia	1	0	0.0817113123915976
HP:0011916	Toe extensor amyotrophy	1	0	0.0817113123915976
HP:0012074	Tonic pupil	1	0	0.0817113123915976
HP:0012081	Enlarged cerebellum	1	0	0.0817113123915976
HP:0012377	Hemianopia	1	0	0.0817113123915976
HP:0012534	Dysesthesia	1	0	0.0817113123915976
HP:0020081	Pappenheimer bodies	1	0	0.0817113123915976
HP:0025072	Prominent U wave	1	0	0.0817113123915976
HP:0025169	Left ventricular systolic dysfunction	1	0	0.0817113123915976
HP:0030095	Reduced muscle collagen VI	1	0	0.0817113123915976
HP:0030205	Increased jitter at single fibre EMG	1	0	0.0817113123915976
HP:0030838	Hip pain	1	0	0.0817113123915976
HP:0030843	Cardiac amyloidosis	1	0	0.0817113123915976
HP:0030996	Megaduodenum	1	0	0.0817113123915976
HP:0031108	Triceps weakness	1	0	0.0817113123915976
HP:0031189	Wrist drop	1	0	0.0817113123915976
HP:0031649	Aortic rupture	1	0	0.0817113123915976
HP:0032147	Erythromelalgia	1	0	0.0817113123915976
HP:0032391	Subcortical heterotopia	1	0	0.0817113123915976
HP:0032460	Decreased phosphoribosylpyrophosphate synthetase activity	1	0	0.0817113123915976
HP:0040264	Jaw pain	1	0	0.0817113123915976
HP:0045054	Brachial plexus neuropathy	1	0	0.0817113123915976
HP:0100244	Fibrosarcoma	1	0	0.0817113123915976
HP:0100254	Stenosis of the medullary cavity of the long bones	1	0	0.0817113123915976
HP:0100613	Death in early adulthood	1	0	0.0817113123915976
HP:0100771	Hypoperistalsis	1	0	0.0817113123915976
HP:0200101	Decreased/absent ankle reflexes	1	0	0.0817113123915976
HP:0002529	Neuronal loss in central nervous system	5	24	0.0828573666891801
HP:0000734	Disinhibition	3	10	0.0837656108299186
HP:0001989	Fetal akinesia sequence	3	10	0.0837656108299186
HP:0001397	Hepatic steatosis	7	40	0.0848908911205642
HP:0006380	Knee flexion contracture	6	32	0.0853081886942873
HP:0002643	Neonatal respiratory distress	4	17	0.0866909870443551
HP:0003680	Nonprogressive	4	17	0.0866909870443551
HP:0001290	Generalized hypotonia	75	719	0.0894529366628205
HP:0001337	Tremor	17	130	0.0895807515815467
HP:0000407	Sensorineural hearing impairment	32	276	0.0902121069242343
HP:0002900	Hypokalemia	5	25	0.093099285082395
HP:0000649	Abnormality of visual evoked potentials	3	11	0.100408939586856
HP:0003487	Babinski sign	18	142	0.100768203950696
HP:0002194	Delayed gross motor development	5	26	0.103957089930645
HP:0000616	Miosis	2	5	0.106296794095743
HP:0001151	Impaired horizontal smooth pursuit	2	5	0.106296794095743
HP:0001413	Micronodular cirrhosis	2	5	0.106296794095743
HP:0002783	Recurrent lower respiratory tract infections	2	5	0.106296794095743
HP:0001824	Weight loss	3	12	0.118246514284871
HP:0002126	Polymicrogyria	9	62	0.122316225835658
HP:0000275	Narrow face	5	28	0.127437165303525
HP:0001315	Reduced tendon reflexes	2	6	0.13431815727322
HP:0001935	Microcytic anemia	2	6	0.13431815727322
HP:0002791	Hypoventilation	2	6	0.13431815727322
HP:0002828	Multiple joint contractures	2	6	0.13431815727322
HP:0002835	Aspiration	2	6	0.13431815727322
HP:0003689	Multiple mitochondrial DNA deletions	2	6	0.13431815727322
HP:0010871	Sensory ataxia	2	6	0.13431815727322
HP:0002091	Restrictive ventilatory defect	3	13	0.13715362213321
HP:0002273	Tetraparesis	3	13	0.13715362213321
HP:0002839	Urinary bladder sphincter dysfunction	3	13	0.13715362213321
HP:0003429	CNS hypomyelination	4	21	0.142421129018107
HP:0001374	Congenital hip dislocation	5	30	0.153101529595581
HP:0000549	Abnormal conjugate eye movement	1	1	0.156760349312562
HP:0000650	Abnormal amplitude of pattern reversal visual evoked potentials	1	1	0.156760349312562
HP:0001055	Erysipelas	1	1	0.156760349312562
HP:0001814	Deep-set nails	1	1	0.156760349312562
HP:0002193	Pseudobulbar behavioral symptoms	1	1	0.156760349312562
HP:0002254	Intermittent diarrhea	1	1	0.156760349312562
HP:0002491	Spasticity of facial muscles	1	1	0.156760349312562
HP:0002501	Spasticity of pharyngeal muscles	1	1	0.156760349312562
HP:0002862	Bladder carcinoma	1	1	0.156760349312562
HP:0003194	Short nasal bridge	1	1	0.156760349312562
HP:0003634	Amyoplasia	1	1	0.156760349312562
HP:0003778	Short mandibular rami	1	1	0.156760349312562
HP:0003779	Antegonial notching of mandible	1	1	0.156760349312562
HP:0004631	Decreased cervical spine flexion due to contractures of posterior cervical muscles	1	1	0.156760349312562
HP:0004696	Talipes cavus equinovarus	1	1	0.156760349312562
HP:0005045	Diaphyseal cortical sclerosis	1	1	0.156760349312562
HP:0006006	Hypotrophy of the small hand muscles	1	1	0.156760349312562
HP:0006827	Atrophy of the spinal cord	1	1	0.156760349312562
HP:0006897	Cranial nerve VI palsy	1	1	0.156760349312562
HP:0006913	Frontal cortical atrophy	1	1	0.156760349312562
HP:0006978	Dysmyelinating leukodystrophy	1	1	0.156760349312562
HP:0007610	Blotching pigmentation of the skin	1	1	0.156760349312562
HP:0007634	Nonarteritic anterior ischemic optic neuropathy	1	1	0.156760349312562
HP:0007819	Presenile cataracts	1	1	0.156760349312562
HP:0008189	Insulin insensitivity	1	1	0.156760349312562
HP:0008214	Decreased serum estradiol	1	1	0.156760349312562
HP:0008314	Decreased activity of mitochondrial complex II	1	1	0.156760349312562
HP:0008668	Gonadal dysgenesis, male	1	1	0.156760349312562
HP:0008998	Pectoralis hypoplasia	1	1	0.156760349312562
HP:0009058	Increased muscle lipid content	1	1	0.156760349312562
HP:0010546	Muscle fibrillation	1	1	0.156760349312562
HP:0010620	Malar prominence	1	1	0.156760349312562
HP:0010831	Impaired proprioception	1	1	0.156760349312562
HP:0011308	Slender toe	1	1	0.156760349312562
HP:0011382	Hypoplasia of the semicircular canal	1	1	0.156760349312562
HP:0011410	Caesarian section	1	1	0.156760349312562
HP:0011727	Peroneal muscle weakness	1	1	0.156760349312562
HP:0012231	Exudative retinal detachment	1	1	0.156760349312562
HP:0012315	Histiocytoma	1	1	0.156760349312562
HP:0025403	Stooped posture	1	1	0.156760349312562
HP:0030059	Mitochondrial depletion	1	1	0.156760349312562
HP:0031367	Metaphyseal striations	1	1	0.156760349312562
HP:0031368	Intestinal perforation	1	1	0.156760349312562
HP:0031842	Lymphangiectasis	1	1	0.156760349312562
HP:0100580	Barrett esophagus	1	1	0.156760349312562
HP:0200125	Mitochondrial respiratory chain defects	1	1	0.156760349312562
HP:0001547	Abnormality of the rib cage	3	14	0.157003187512859
HP:0003401	Paresthesia	3	14	0.157003187512859
HP:0002987	Elbow flexion contracture	6	39	0.157551625240335
HP:0002311	Incoordination	4	22	0.158139119208287
HP:0000726	Dementia	10	76	0.161733354684055
HP:0000622	Blurred vision	2	7	0.163734137059055
HP:0002536	Abnormal cortical gyration	2	7	0.163734137059055
HP:0005855	Multiple prenatal fractures	2	7	0.163734137059055
HP:0001399	Hepatic failure	5	31	0.166680418284136
HP:0000020	Urinary incontinence	7	49	0.169516761639607
HP:0000473	Torticollis	4	23	0.174461876572749
HP:0002104	Apnea	8	59	0.17792151398121
HP:0000966	Hypohidrosis	5	32	0.180714527818985
HP:0100543	Cognitive impairment	11	88	0.182664979876036
HP:0002120	Cerebral cortical atrophy	9	69	0.183916669363524
HP:0002808	Kyphosis	14	118	0.188048307298164
HP:0001609	Hoarse voice	4	24	0.191330886617318
HP:0002317	Unsteady gait	7	51	0.192091482912979
HP:0000029	Testicular atrophy	2	8	0.194131122734467
HP:0001097	Keratoconjunctivitis sicca	2	8	0.194131122734467
HP:0001350	Slurred speech	2	8	0.194131122734467
HP:0002944	Thoracolumbar scoliosis	2	8	0.194131122734467
HP:0003587	Insidious onset	2	8	0.194131122734467
HP:0002070	Limb ataxia	6	42	0.19470788377689
HP:0000238	Hydrocephalus	14	119	0.195565184127471
HP:0000603	Central scotoma	3	16	0.199023530413982
HP:0002084	Encephalocele	3	16	0.199023530413982
HP:0002174	Postural tremor	3	16	0.199023530413982
HP:0001522	Death in infancy	7	52	0.203811180825112
HP:0000276	Long face	10	81	0.206870761222414
HP:0000458	Anosmia	4	25	0.208686649805821
HP:0000815	Hypergonadotropic hypogonadism	4	25	0.208686649805821
HP:0031936	Delayed ability to walk	9	72	0.213880718723848
HP:0000640	Gaze-evoked nystagmus	3	17	0.220947696273456
HP:0000133	Gonadal dysgenesis	2	9	0.225153512483224
HP:0000298	Mask-like facies	2	9	0.225153512483224
HP:0000641	Dysmetric saccades	2	9	0.225153512483224
HP:0001623	Breech presentation	2	9	0.225153512483224
HP:0001947	Renal tubular acidosis	2	9	0.225153512483224
HP:0002312	Clumsiness	2	9	0.225153512483224
HP:0002495	Impaired vibratory sensation	2	9	0.225153512483224
HP:0000183	Difficulty in tongue movements	1	2	0.22568913510232
HP:0000205	Pursed lips	1	2	0.22568913510232
HP:0000570	Abnormal saccadic eye movements	1	2	0.22568913510232
HP:0001405	Periportal fibrosis	1	2	0.22568913510232
HP:0001692	Atrial arrhythmia	1	2	0.22568913510232
HP:0001818	Paronychia	1	2	0.22568913510232
HP:0001842	Foot acroosteolysis	1	2	0.22568913510232
HP:0001853	Bifid distal phalanx of toe	1	2	0.22568913510232
HP:0002230	Generalized hirsutism	1	2	0.22568913510232
HP:0002269	Abnormality of neuronal migration	1	2	0.22568913510232
HP:0002442	Dyscalculia	1	2	0.22568913510232
HP:0002448	Progressive encephalopathy	1	2	0.22568913510232
HP:0002464	Spastic dysarthria	1	2	0.22568913510232
HP:0002595	Ileus	1	2	0.22568913510232
HP:0002686	Prenatal maternal abnormality	1	2	0.22568913510232
HP:0003216	Generalized amyloid deposition	1	2	0.22568913510232
HP:0003409	Distal sensory impairment of all modalities	1	2	0.22568913510232
HP:0003517	Birth length greater than 97th percentile	1	2	0.22568913510232
HP:0004388	Microcolon	1	2	0.22568913510232
HP:0004552	Scarring alopecia of scalp	1	2	0.22568913510232
HP:0004782	Hypotrichosis of the scalp	1	2	0.22568913510232
HP:0004818	Paroxysmal nocturnal hemoglobinuria	1	2	0.22568913510232
HP:0004911	Episodic metabolic acidosis	1	2	0.22568913510232
HP:0005686	Patchy osteosclerosis	1	2	0.22568913510232
HP:0005949	Apneic episodes in infancy	1	2	0.22568913510232
HP:0005952	Decreased pulmonary function	1	2	0.22568913510232
HP:0005988	Congenital muscular torticollis	1	2	0.22568913510232
HP:0005997	Restricted neck movement due to contractures	1	2	0.22568913510232
HP:0006938	Impaired vibration sensation at ankles	1	2	0.22568913510232
HP:0007078	Decreased amplitude of sensory action potentials	1	2	0.22568913510232
HP:0007763	Retinal telangiectasia	1	2	0.22568913510232
HP:0008153	Periodic hypokalemic paresis	1	2	0.22568913510232
HP:0008568	Vestibular areflexia	1	2	0.22568913510232
HP:0008942	Acute rhabdomyolysis	1	2	0.22568913510232
HP:0009049	Peroneal muscle atrophy	1	2	0.22568913510232
HP:0009611	Bifid distal phalanx of the thumb	1	2	0.22568913510232
HP:0010571	Elevated levels of phytanic acid	1	2	0.22568913510232
HP:0010639	Elevated alkaline phosphatase of bone origin	1	2	0.22568913510232
HP:0011734	Central adrenal insufficiency	1	2	0.22568913510232
HP:0011787	Central hypothyroidism	1	2	0.22568913510232
HP:0011859	Punctate keratitis	1	2	0.22568913510232
HP:0025425	Laryngospasm	1	2	0.22568913510232
HP:0031258	Delirium	1	2	0.22568913510232
HP:0100725	Lichenification	1	2	0.22568913510232
HP:0200085	Limb tremor	1	2	0.22568913510232
HP:0002305	Athetosis	4	26	0.226469321301732
HP:0002187	Intellectual disability, profound	6	45	0.234785372721344
HP:0001622	Premature birth	5	37	0.256496596540341
HP:0001105	Retinal atrophy	2	10	0.256497030098055
HP:0003535	3-Methylglutaconic aciduria	2	10	0.256497030098055
HP:0002540	Inability to walk	10	86	0.256618944432566
HP:0001657	Prolonged QT interval	3	19	0.266040615190043
HP:0003829	Incomplete penetrance	13	119	0.280536984003289
HP:0001385	Hip dysplasia	4	29	0.281786670105524
HP:0001278	Orthostatic hypotension	2	11	0.287902742692262
HP:0001626	Abnormality of the cardiovascular system	2	11	0.287902742692262
HP:0001678	Atrioventricular block	2	11	0.287902742692262
HP:0002267	Exaggerated startle response	2	11	0.287902742692262
HP:0002463	Language impairment	2	11	0.287902742692262
HP:0003542	Increased serum pyruvate	2	11	0.287902742692262
HP:0000541	Retinal detachment	5	39	0.288754020628215
HP:0000408	Progressive sensorineural hearing impairment	3	20	0.288993069185726
HP:0003199	Decreased muscle mass	3	20	0.288993069185726
HP:0000021	Megacystis	1	3	0.288995692510075
HP:0000050	Hypoplastic male external genitalia	1	3	0.288995692510075
HP:0000185	Cleft soft palate	1	3	0.288995692510075
HP:0000642	Red-green dyschromatopsia	1	3	0.288995692510075
HP:0001404	Hepatocellular necrosis	1	3	0.288995692510075
HP:0001544	Prominent umbilicus	1	3	0.288995692510075
HP:0001864	Clinodactyly of the 5th toe	1	3	0.288995692510075
HP:0002275	Poor motor coordination	1	3	0.288995692510075
HP:0002425	Anarthria	1	3	0.288995692510075
HP:0002446	Astrocytosis	1	3	0.288995692510075
HP:0002493	Upper motor neuron dysfunction	1	3	0.288995692510075
HP:0002503	Spinocerebellar tract degeneration	1	3	0.288995692510075
HP:0003084	Fractures of the long bones	1	3	0.288995692510075
HP:0003093	Limited hip extension	1	3	0.288995692510075
HP:0003184	Decreased hip abduction	1	3	0.288995692510075
HP:0003467	Atlantoaxial instability	1	3	0.288995692510075
HP:0006858	Impaired distal proprioception	1	3	0.288995692510075
HP:0006879	Pontocerebellar atrophy	1	3	0.288995692510075
HP:0007308	Extrapyramidal dyskinesia	1	3	0.288995692510075
HP:0007924	Slow decrease in visual acuity	1	3	0.288995692510075
HP:0007968	Remnants of the hyaloid vascular system	1	3	0.288995692510075
HP:0008207	Primary adrenal insufficiency	1	3	0.288995692510075
HP:0009743	Distichiasis	1	3	0.288995692510075
HP:0011705	First degree atrioventricular block	1	3	0.288995692510075
HP:0011924	Decreased activity of mitochondrial complex III	1	3	0.288995692510075
HP:0031987	Diminished ability to concentrate	1	3	0.288995692510075
HP:0100633	Esophagitis	1	3	0.288995692510075
HP:0410170	Hippocampal atrophy	1	3	0.288995692510075
HP:0002076	Migraine	3	21	0.31208283253601
HP:0100490	Camptodactyly of finger	3	21	0.31208283253601
HP:0002395	Lower limb hyperreflexia	2	12	0.319151709876496
HP:0007370	Aplasia/Hypoplasia of the corpus callosum	2	12	0.319151709876496
HP:0012120	Methylmalonic aciduria	2	12	0.319151709876496
HP:0000609	Optic nerve hypoplasia	3	22	0.33521851937936
HP:0001789	Hydrops fetalis	3	22	0.33521851937936
HP:0002172	Postural instability	3	22	0.33521851937936
HP:0002064	Spastic gait	4	32	0.338865576458123
HP:0000016	Urinary retention	1	4	0.347137606950909
HP:0000144	Decreased fertility	1	4	0.347137606950909
HP:0000552	Tritanomaly	1	4	0.347137606950909
HP:0000727	Frontal lobe dementia	1	4	0.347137606950909
HP:0000870	Increased circulating prolactin concentration	1	4	0.347137606950909
HP:0001149	Lattice corneal dystrophy	1	4	0.347137606950909
HP:0001488	Bilateral ptosis	1	4	0.347137606950909
HP:0001913	Granulocytopenia	1	4	0.347137606950909
HP:0001985	Hypoketotic hypoglycemia	1	4	0.347137606950909
HP:0002086	Abnormality of the respiratory system	1	4	0.347137606950909
HP:0002221	Absent axillary hair	1	4	0.347137606950909
HP:0002242	Abnormal intestine morphology	1	4	0.347137606950909
HP:0002401	Stroke-like episode	1	4	0.347137606950909
HP:0002607	Bowel incontinence	1	4	0.347137606950909
HP:0003584	Late onset	1	4	0.347137606950909
HP:0004689	Short fourth metatarsal	1	4	0.347137606950909
HP:0004755	Supraventricular tachycardia	1	4	0.347137606950909
HP:0005989	Redundant neck skin	1	4	0.347137606950909
HP:0006254	Elevated alpha-fetoprotein	1	4	0.347137606950909
HP:0007024	Pseudobulbar paralysis	1	4	0.347137606950909
HP:0007766	Optic disc hypoplasia	1	4	0.347137606950909
HP:0007814	Retinal pigment epithelial mottling	1	4	0.347137606950909
HP:0008305	Exercise-induced myoglobinuria	1	4	0.347137606950909
HP:0009917	Persistent pupillary membrane	1	4	0.347137606950909
HP:0010984	Digenic inheritance	1	4	0.347137606950909
HP:0011682	Perimembranous ventricular septal defect	1	4	0.347137606950909
HP:0011923	Decreased activity of mitochondrial complex I	1	4	0.347137606950909
HP:0012227	Urethral stricture	1	4	0.347137606950909
HP:0012240	Increased intramyocellular lipid droplets	1	4	0.347137606950909
HP:0001763	Pes planus	11	105	0.34825578452909
HP:0000360	Tinnitus	2	13	0.350060201505977
HP:0000485	Megalocornea	2	13	0.350060201505977
HP:0000654	Decreased light- and dark-adapted electroretinogram amplitude	2	13	0.350060201505977
HP:0002300	Mutism	2	13	0.350060201505977
HP:0002779	Tracheomalacia	2	13	0.350060201505977
HP:0002870	Obstructive sleep apnea	2	13	0.350060201505977
HP:0008232	Elevated circulating follicle stimulating hormone level	2	13	0.350060201505977
HP:0002171	Gliosis	5	43	0.355021238278939
HP:0000712	Emotional lability	3	23	0.358315832445152
HP:0001620	High pitched voice	3	23	0.358315832445152
HP:0000709	Psychosis	4	34	0.377196031922491
HP:0000491	Keratitis	2	14	0.380475427130657
HP:0001409	Portal hypertension	2	14	0.380475427130657
HP:0002062	Morphological abnormality of the pyramidal tract	2	14	0.380475427130657
HP:0002445	Tetraplegia	2	14	0.380475427130657
HP:0002539	Cortical dysplasia	2	14	0.380475427130657
HP:0003502	Mild short stature	2	14	0.380475427130657
HP:0004409	Hyposmia	2	14	0.380475427130657
HP:0001541	Ascites	3	24	0.381297576929202
HP:0003270	Abdominal distention	3	24	0.381297576929202
HP:0002352	Leukoencephalopathy	4	35	0.396302779513659
HP:0000798	Oligospermia	1	5	0.40053530267869
HP:0001063	Acrocyanosis	1	5	0.40053530267869
HP:0001093	Optic nerve dysplasia	1	5	0.40053530267869
HP:0001560	Abnormality of the amniotic fluid	1	5	0.40053530267869
HP:0001621	Weak voice	1	5	0.40053530267869
HP:0001685	Myocardial fibrosis	1	5	0.40053530267869
HP:0001706	Endocardial fibroelastosis	1	5	0.40053530267869
HP:0001931	Hypochromic anemia	1	5	0.40053530267869
HP:0002045	Hypothermia	1	5	0.40053530267869
HP:0002198	Dilated fourth ventricle	1	5	0.40053530267869
HP:0002654	Multiple epiphyseal dysplasia	1	5	0.40053530267869
HP:0002859	Rhabdomyosarcoma	1	5	0.40053530267869
HP:0002909	Generalized aminoaciduria	1	5	0.40053530267869
HP:0003455	Elevated circulating long chain fatty acid concentration	1	5	0.40053530267869
HP:0003573	Increased total bilirubin	1	5	0.40053530267869
HP:0003750	Increased muscle fatiguability	1	5	0.40053530267869
HP:0006554	Acute hepatic failure	1	5	0.40053530267869
HP:0008770	Obsessive-compulsive trait	1	5	0.40053530267869
HP:0011449	Knee clonus	1	5	0.40053530267869
HP:0012132	Erythroid hyperplasia	1	5	0.40053530267869
HP:0012345	Abnormal glycosylation	1	5	0.40053530267869
HP:0030223	Perseveration	1	5	0.40053530267869
HP:0100874	Thick hair	1	5	0.40053530267869
HP:0200042	Skin ulcer	1	5	0.40053530267869
HP:0003623	Neonatal onset	3	25	0.404093579766628
HP:0002948	Vertebral fusion	2	15	0.410271725746364
HP:0003348	Hyperalaninemia	2	15	0.410271725746364
HP:0006887	Intellectual disability, progressive	4	36	0.415313684196197
HP:0001305	Dandy-Walker malformation	5	47	0.421845930009964
HP:0008064	Ichthyosis	4	37	0.434189575761334
HP:0002085	Occipital encephalocele	2	16	0.43934716939991
HP:0001954	Recurrent fever	3	27	0.448881778992746
HP:0000464	Abnormality of the neck	1	6	0.449575054109181
HP:0000523	Subcapsular cataract	1	6	0.449575054109181
HP:0000524	Conjunctival telangiectasia	1	6	0.449575054109181
HP:0000573	Retinal hemorrhage	1	6	0.449575054109181
HP:0001053	Hypopigmented skin patches	1	6	0.449575054109181
HP:0001058	Poor wound healing	1	6	0.449575054109181
HP:0001152	Saccadic smooth pursuit	1	6	0.449575054109181
HP:0001688	Sinus bradycardia	1	6	0.449575054109181
HP:0001810	Dystrophic toenail	1	6	0.449575054109181
HP:0001816	Thin nail	1	6	0.449575054109181
HP:0001869	Deep plantar creases	1	6	0.449575054109181
HP:0001884	Talipes calcaneovalgus	1	6	0.449575054109181
HP:0002280	Enlarged cisterna magna	1	6	0.449575054109181
HP:0002542	Olivopontocerebellar atrophy	1	6	0.449575054109181
HP:0002571	Achalasia	1	6	0.449575054109181
HP:0005144	Ventricular septal hypertrophy	1	6	0.449575054109181
HP:0005830	Flexion contracture of toe	1	6	0.449575054109181
HP:0007266	Cerebral dysmyelination	1	6	0.449575054109181
HP:0007291	Posterior fossa cyst	1	6	0.449575054109181
HP:0011098	Speech apraxia	1	6	0.449575054109181
HP:0011120	Concave nasal ridge	1	6	0.449575054109181
HP:0012185	Constrictive median neuropathy	1	6	0.449575054109181
HP:0012531	Pain	1	6	0.449575054109181
HP:0000396	Overfolded helix	2	17	0.467620538692373
HP:0000751	Personality changes	2	17	0.467620538692373
HP:0000977	Soft skin	2	17	0.467620538692373
HP:0002487	Hyperkinetic movements	2	17	0.467620538692373
HP:0001662	Bradycardia	3	28	0.470767046580735
HP:0000015	Bladder diverticulum	1	7	0.494611753657175
HP:0000217	Xerostomia	1	7	0.494611753657175
HP:0000300	Oval face	1	7	0.494611753657175
HP:0000696	Delayed eruption of permanent teeth	1	7	0.494611753657175
HP:0001012	Multiple lipomas	1	7	0.494611753657175
HP:0001348	Brisk reflexes	1	7	0.494611753657175
HP:0001403	Macrovesicular hepatic steatosis	1	7	0.494611753657175
HP:0001598	Concave nail	1	7	0.494611753657175
HP:0001667	Right ventricular hypertrophy	1	7	0.494611753657175
HP:0002107	Pneumothorax	1	7	0.494611753657175
HP:0002225	Sparse pubic hair	1	7	0.494611753657175
HP:0002226	White eyebrow	1	7	0.494611753657175
HP:0002314	Degeneration of the lateral corticospinal tracts	1	7	0.494611753657175
HP:0002357	Dysphasia	1	7	0.494611753657175
HP:0002669	Osteosarcoma	1	7	0.494611753657175
HP:0003141	Increased LDL cholesterol concentration	1	7	0.494611753657175
HP:0003563	Decreased LDL cholesterol concentration	1	7	0.494611753657175
HP:0003743	Genetic anticipation	1	7	0.494611753657175
HP:0006986	Upper limb spasticity	1	7	0.494611753657175
HP:0007328	Impaired pain sensation	1	7	0.494611753657175
HP:0007641	Dyschromatopsia	1	7	0.494611753657175
HP:0008807	Acetabular dysplasia	1	7	0.494611753657175
HP:0011510	Drusen	1	7	0.494611753657175
HP:0000514	Slow saccadic eye movements	2	18	0.495028632294475
HP:0010557	Overlapping fingers	2	18	0.495028632294475
HP:0000110	Renal dysplasia	3	30	0.513298706445117
HP:0000006	Autosomal dominant inheritance	173	1944	0.518799009935594
HP:0000853	Goiter	2	19	0.521523876275124
HP:0001269	Hemiparesis	2	19	0.521523876275124
HP:0002024	Malabsorption	2	19	0.521523876275124
HP:0009473	Joint contracture of the hand	4	42	0.52536940476967
HP:0001328	Specific learning disability	3	31	0.533873723814195
HP:0003355	Aminoaciduria	3	31	0.533873723814195
HP:0000211	Trismus	1	8	0.535971455731941
HP:0000924	Abnormality of the skeletal system	1	8	0.535971455731941
HP:0001029	Poikiloderma	1	8	0.535971455731941
HP:0001239	Wrist flexion contracture	1	8	0.535971455731941
HP:0001684	Secundum atrial septal defect	1	8	0.535971455731941
HP:0002040	Esophageal varix	1	8	0.535971455731941
HP:0002227	White eyelashes	1	8	0.535971455731941
HP:0002780	Bronchomalacia	1	8	0.535971455731941
HP:0003138	Increased blood urea nitrogen	1	8	0.535971455731941
HP:0003146	Hypocholesterolemia	1	8	0.535971455731941
HP:0003416	Spinal canal stenosis	1	8	0.535971455731941
HP:0004749	Atrial flutter	1	8	0.535971455731941
HP:0011506	Choroidal neovascularization	1	8	0.535971455731941
HP:0200136	Oral-pharyngeal dysphagia	1	8	0.535971455731941
HP:0000545	Myopia	14	157	0.538736963644431
HP:0000589	Coloboma	4	43	0.542769169816308
HP:0007957	Corneal opacity	2	20	0.547072202383633
HP:0001635	Congestive heart failure	7	78	0.549330036712987
HP:0003073	Hypoalbuminemia	3	32	0.553949333026473
HP:0000546	Retinal degeneration	4	44	0.559837163592433
HP:0001258	Spastic paraplegia	6	68	0.570080591786252
HP:0000956	Acanthosis nigricans	2	21	0.5716511674501
HP:0000096	Glomerulosclerosis	1	9	0.573953714953882
HP:0000605	Supranuclear gaze palsy	1	9	0.573953714953882
HP:0000746	Delusions	1	9	0.573953714953882
HP:0000802	Impotence	1	9	0.573953714953882
HP:0001100	Heterochromia iridis	1	9	0.573953714953882
HP:0001138	Optic neuropathy	1	9	0.573953714953882
HP:0001273	Abnormal corpus callosum morphology	1	9	0.573953714953882
HP:0001716	Wolff-Parkinson-White syndrome	1	9	0.573953714953882
HP:0002131	Episodic ataxia	1	9	0.573953714953882
HP:0002211	White forelock	1	9	0.573953714953882
HP:0002816	Genu recurvatum	1	9	0.573953714953882
HP:0002912	Methylmalonic acidemia	1	9	0.573953714953882
HP:0003764	Nevus	1	9	0.573953714953882
HP:0004425	Flat forehead	1	9	0.573953714953882
HP:0006335	Persistence of primary teeth	1	9	0.573953714953882
HP:0011398	Central hypotonia	1	9	0.573953714953882
HP:0100753	Schizophrenia	1	9	0.573953714953882
HP:0001298	Encephalopathy	6	69	0.583551989755474
HP:0001310	Dysmetria	8	93	0.590605478063369
HP:0002212	Curly hair	2	22	0.595248288805926
HP:0000365	Hearing impairment	21	246	0.608539921625272
HP:0000114	Proximal tubulopathy	1	10	0.608833735200948
HP:0000153	Abnormality of the mouth	1	10	0.608833735200948
HP:0001438	Abnormality of abdomen morphology	1	10	0.608833735200948
HP:0001730	Progressive hearing impairment	1	10	0.608833735200948
HP:0001739	Abnormality of the nasopharynx	1	10	0.608833735200948
HP:0002018	Nausea	1	10	0.608833735200948
HP:0002304	Akinesia	1	10	0.608833735200948
HP:0002850	Decreased circulating total IgM	1	10	0.608833735200948
HP:0002996	Limited elbow movement	1	10	0.608833735200948
HP:0003417	Coronal cleft vertebrae	1	10	0.608833735200948
HP:0007366	Atrophy/Degeneration affecting the brainstem	1	10	0.608833735200948
HP:0001712	Left ventricular hypertrophy	3	35	0.610970038673328
HP:0002094	Dyspnea	3	35	0.610970038673328
HP:0000012	Urinary urgency	2	23	0.617859573103888
HP:0000331	Short chin	2	23	0.617859573103888
HP:0001507	Growth abnormality	2	23	0.617859573103888
HP:0001347	Hyperreflexia	23	271	0.621468181069633
HP:0001300	Parkinsonism	5	60	0.622830785739371
HP:0002098	Respiratory distress	5	60	0.622830785739371
HP:0002019	Constipation	8	96	0.62439494821529
HP:0005110	Atrial fibrillation	3	36	0.628858976936634
HP:0000162	Glossoptosis	1	11	0.640864344755756
HP:0000171	Microglossia	1	11	0.640864344755756
HP:0000707	Abnormality of the nervous system	1	11	0.640864344755756
HP:0000855	Insulin resistance	1	11	0.640864344755756
HP:0001540	Diastasis recti	1	11	0.640864344755756
HP:0002310	Orofacial dyskinesia	1	11	0.640864344755756
HP:0002323	Anencephaly	1	11	0.640864344755756
HP:0002384	Focal impaired awareness seizure	1	11	0.640864344755756
HP:0002949	Fused cervical vertebrae	1	11	0.640864344755756
HP:0003011	Abnormality of the musculature	1	11	0.640864344755756
HP:0008066	Abnormal blistering of the skin	1	11	0.640864344755756
HP:0011969	Elevated circulating luteinizing hormone level	1	11	0.640864344755756
HP:0010864	Intellectual disability, severe	8	98	0.646068258177838
HP:0002072	Chorea	4	50	0.654443266086894
HP:0001251	Ataxia	24	288	0.656598805436982
HP:0001943	Hypoglycemia	6	75	0.659530263463981
HP:0000974	Hyperextensible skin	2	25	0.660143469457149
HP:0000989	Pruritus	2	25	0.660143469457149
HP:0001285	Spastic tetraparesis	2	25	0.660143469457149
HP:0001419	X-linked recessive inheritance	16	195	0.662653428955212
HP:0000324	Facial asymmetry	3	38	0.662909029950526
HP:0002027	Abdominal pain	3	38	0.662909029950526
HP:0000135	Hypogonadism	4	51	0.668815823725758
HP:0001090	Abnormally large globe	1	12	0.670277811594381
HP:0001187	Hyperextensibility of the finger joints	1	12	0.670277811594381
HP:0001714	Ventricular hypertrophy	1	12	0.670277811594381
HP:0002663	Delayed epiphyseal ossification	1	12	0.670277811594381
HP:0003468	Abnormal vertebral morphology	1	12	0.670277811594381
HP:0005576	Tubulointerstitial fibrosis	1	12	0.670277811594381
HP:0006191	Deep palmar crease	1	12	0.670277811594381
HP:0008947	Infantile muscular hypotonia	1	12	0.670277811594381
HP:0010535	Sleep apnea	1	12	0.670277811594381
HP:0010702	Increased antibody level in blood	1	12	0.670277811594381
HP:0200021	Down-sloping shoulders	1	12	0.670277811594381
HP:0000953	Hyperpigmentation of the skin	2	26	0.679839614817959
HP:0002169	Clonus	2	26	0.679839614817959
HP:0002136	Broad-based gait	3	40	0.694639297506866
HP:0000011	Neurogenic bladder	1	13	0.697287511726526
HP:0000201	Pierre-Robin sequence	1	13	0.697287511726526
HP:0000765	Abnormality of the thorax	1	13	0.697287511726526
HP:0000842	Hyperinsulinemia	1	13	0.697287511726526
HP:0001056	Milia	1	13	0.697287511726526
HP:0001808	Fragile nails	1	13	0.697287511726526
HP:0002651	Spondyloepimetaphyseal dysplasia	1	13	0.697287511726526
HP:0003040	Arthropathy	1	13	0.697287511726526
HP:0030682	Left ventricular noncompaction	1	13	0.697287511726526
HP:0040189	Scaling skin	1	13	0.697287511726526
HP:0001518	Small for gestational age	6	79	0.705111635676189
HP:0001332	Dystonia	14	177	0.706357143082135
HP:0001394	Cirrhosis	4	54	0.709439377196276
HP:0000572	Visual loss	3	41	0.709637951819619
HP:0007759	Opacification of the corneal stroma	3	41	0.709637951819619
HP:0008734	Decreased testicular size	3	41	0.709637951819619
HP:0001423	X-linked dominant inheritance	5	67	0.711982969570097
HP:0002061	Lower limb spasticity	2	28	0.716431768297086
HP:0001360	Holoprosencephaly	1	14	0.722089462456565
HP:0001751	Vestibular dysfunction	1	14	0.722089462456565
HP:0003642	Type I transferrin isoform profile	1	14	0.722089462456565
HP:0005180	Tricuspid regurgitation	1	14	0.722089462456565
HP:0007099	Arnold-Chiari type I malformation	1	14	0.722089462456565
HP:0010582	Irregular epiphyses	1	14	0.722089462456565
HP:0000618	Blindness	5	68	0.723422778532914
HP:0002075	Dysdiadochokinesis	2	29	0.733374162898214
HP:0000413	Atresia of the external auditory canal	1	15	0.744863731478292
HP:0000551	Color vision defect	1	15	0.744863731478292
HP:0000742	Self-mutilation	1	15	0.744863731478292
HP:0001408	Bile duct proliferation	1	15	0.744863731478292
HP:0002166	Impaired vibration sensation in the lower limbs	1	15	0.744863731478292
HP:0002206	Pulmonary fibrosis	1	15	0.744863731478292
HP:0002371	Loss of speech	1	15	0.744863731478292
HP:0003256	Abnormality of the coagulation cascade	1	15	0.744863731478292
HP:0003259	Elevated serum creatinine	1	15	0.744863731478292
HP:0010585	Small epiphyses	1	15	0.744863731478292
HP:0000501	Glaucoma	5	70	0.745318998441447
HP:0001182	Tapered finger	4	57	0.746316997881846
HP:0000951	Abnormality of the skin	2	30	0.74944896324563
HP:0001357	Plagiocephaly	2	30	0.74944896324563
HP:0010804	Tented upper lip vermilion	2	30	0.74944896324563
HP:0001510	Growth delay	10	134	0.751106624700048
HP:0000293	Full cheeks	3	44	0.751233834891919
HP:0002155	Hypertriglyceridemia	3	44	0.751233834891919
HP:0000648	Optic atrophy	17	220	0.751576389218322
HP:0000580	Pigmentary retinopathy	3	45	0.763993612978552
HP:0000122	Unilateral renal agenesis	1	16	0.765775731836538
HP:0000410	Mixed hearing impairment	1	16	0.765775731836538
HP:0001548	Overgrowth	1	16	0.765775731836538
HP:0008619	Bilateral sensorineural hearing impairment	1	16	0.765775731836538
HP:0000519	Developmental cataract	4	59	0.768853260684454
HP:0001336	Myoclonus	7	99	0.774862774225776
HP:0000232	Everted lower lip vermilion	3	46	0.776217826349776
HP:0002078	Truncal ataxia	2	32	0.779110134926258
HP:0002164	Nail dysplasia	4	60	0.779520571412037
HP:0002073	Progressive cerebellar ataxia	1	17	0.784977411979869
HP:0002153	Hyperkalemia	1	17	0.784977411979869
HP:0002659	Increased susceptibility to fractures	1	17	0.784977411979869
HP:0002979	Bowing of the legs	1	17	0.784977411979869
HP:0003077	Hyperlipidemia	1	17	0.784977411979869
HP:0011448	Ankle clonus	1	17	0.784977411979869
HP:0011712	Right bundle branch block	1	17	0.784977411979869
HP:0045075	Sparse eyebrow	1	17	0.784977411979869
HP:0100710	Impulsivity	1	17	0.784977411979869
HP:0000568	Microphthalmia	10	139	0.787674701614307
HP:0007256	Abnormal pyramidal sign	3	47	0.787918368952813
HP:0001655	Patent foramen ovale	2	33	0.792756244132306
HP:0001338	Partial agenesis of the corpus callosum	1	18	0.80260834938473
HP:0002216	Premature graying of hair	1	18	0.80260834938473
HP:0002321	Vertigo	1	18	0.80260834938473
HP:0012736	Profound global developmental delay	1	18	0.80260834938473
HP:0030799	Scaphocephaly	1	18	0.80260834938473
HP:0000657	Oculomotor apraxia	3	49	0.809799981620742
HP:0001410	Decreased liver function	2	35	0.817832919428776
HP:0000478	Abnormality of the eye	1	19	0.818796755547375
HP:0000550	Undetectable electroretinogram	1	19	0.818796755547375
HP:0001669	Transposition of the great arteries	1	19	0.818796755547375
HP:0001733	Pancreatitis	1	19	0.818796755547375
HP:0002313	Spastic paraparesis	1	19	0.818796755547375
HP:0002617	Dilatation	1	19	0.818796755547375
HP:0003186	Inverted nipples	1	19	0.818796755547375
HP:0006579	Prolonged neonatal jaundice	1	19	0.818796755547375
HP:0009125	Lipodystrophy	1	19	0.818796755547375
HP:0001279	Syncope	2	36	0.829325301692968
HP:0001169	Broad palm	1	20	0.833660399510987
HP:0001552	Barrel-shaped chest	1	20	0.833660399510987
HP:0001699	Sudden death	1	20	0.833660399510987
HP:0001840	Metatarsus adductus	1	20	0.833660399510987
HP:0001880	Eosinophilia	1	20	0.833660399510987
HP:0002758	Osteoarthritis	1	20	0.833660399510987
HP:0002789	Tachypnea	1	20	0.833660399510987
HP:0003281	Increased serum ferritin	1	20	0.833660399510987
HP:0004467	Preauricular pit	1	20	0.833660399510987
HP:0000581	Blepharophimosis	4	66	0.835536056865771
HP:0000529	Progressive visual loss	2	37	0.840161319247364
HP:0002719	Recurrent infections	5	81	0.843182277338878
HP:0001671	Abnormal cardiac septum morphology	1	21	0.847307456517052
HP:0002148	Hypophosphatemia	1	21	0.847307456517052
HP:0002179	Opisthotonus	1	21	0.847307456517052
HP:0002186	Apraxia	1	21	0.847307456517052
HP:0002344	Progressive neurologic deterioration	1	21	0.847307456517052
HP:0002720	Decreased circulating IgA level	1	21	0.847307456517052
HP:0100716	Self-injurious behavior	1	21	0.847307456517052
HP:0002080	Intention tremor	2	38	0.850371206569236
HP:0004279	Short palm	2	38	0.850371206569236
HP:0002063	Rigidity	4	68	0.851357975433749
HP:0001276	Hypertonia	5	83	0.857166841351044
HP:0002013	Vomiting	6	97	0.857762359442312
HP:0001382	Joint hypermobility	4	69	0.858774508587421
HP:0001081	Cholelithiasis	1	22	0.859837287838277
HP:0001822	Hallux valgus	1	22	0.859837287838277
HP:0002354	Memory impairment	1	22	0.859837287838277
HP:0002756	Pathologic fracture	1	22	0.859837287838277
HP:0003819	Death in childhood	1	22	0.859837287838277
HP:0000233	Thin vermilion border	2	39	0.859984651524042
HP:0002014	Diarrhea	7	112	0.865381888635685
HP:0002705	High, narrow palate	2	40	0.869030682871715
HP:0000488	Retinopathy	1	23	0.871341157361422
HP:0000677	Oligodontia	1	23	0.871341157361422
HP:0000883	Thin ribs	1	23	0.871341157361422
HP:0002644	Abnormality of pelvic girdle bone morphology	1	23	0.871341157361422
HP:0002656	Epiphyseal dysplasia	1	23	0.871341157361422
HP:0003100	Slender long bone	1	23	0.871341157361422
HP:0000768	Pectus carinatum	4	71	0.872665763327538
HP:0002020	Gastroesophageal reflux	6	100	0.875501206837205
HP:0002119	Ventriculomegaly	12	181	0.876529361788168
HP:0003155	Elevated alkaline phosphatase	2	41	0.877537579718781
HP:0006297	Hypoplasia of dental enamel	2	41	0.877537579718781
HP:0000819	Diabetes mellitus	3	57	0.879159132705918
HP:0000716	Depressivity	4	72	0.879159546345564
HP:0000738	Hallucinations	1	24	0.88190289003882
HP:0002518	Abnormality of the periventricular white matter	1	24	0.88190289003882
HP:0002901	Hypocalcemia	1	24	0.88190289003882
HP:0004315	Decreased circulating IgG level	1	24	0.88190289003882
HP:0008209	Premature ovarian insufficiency	1	24	0.88190289003882
HP:0000823	Delayed puberty	2	42	0.885532800094931
HP:0002415	Leukodystrophy	2	42	0.885532800094931
HP:0012745	Short palpebral fissure	2	42	0.885532800094931
HP:0001377	Limited elbow extension	1	25	0.891599476914021
HP:0002904	Hyperbilirubinemia	1	25	0.891599476914021
HP:0045025	Narrow palpebral fissure	1	25	0.891599476914021
HP:0200055	Small hand	2	43	0.89304292614555
HP:0000824	Growth hormone deficiency	2	44	0.900093623712424
HP:0001320	Cerebellar vermis hypoplasia	2	44	0.900093623712424
HP:0011344	Severe global developmental delay	2	44	0.900093623712424
HP:0000708	Behavioral abnormality	1	26	0.900501631046978
HP:0001317	Abnormal cerebellum morphology	1	26	0.900501631046978
HP:0000737	Irritability	3	61	0.904599057697214
HP:0001274	Agenesis of corpus callosum	6	106	0.905460367122183
HP:0000556	Retinal dystrophy	2	45	0.906709614326668
HP:0001562	Oligohydramnios	2	45	0.906709614326668
HP:0002465	Poor speech	4	77	0.907491379929647
HP:0000308	Microretrognathia	1	27	0.908674298314719
HP:0001396	Cholestasis	1	27	0.908674298314719
HP:0002282	Gray matter heterotopia	1	27	0.908674298314719
HP:0002514	Cerebral calcification	1	27	0.908674298314719
HP:0001642	Pulmonic stenosis	3	62	0.91015407767662
HP:0002066	Gait ataxia	5	93	0.912357786598215
HP:0000430	Underdeveloped nasal alae	2	46	0.912914657863543
HP:0002827	Hip dislocation	3	63	0.915414544550852
HP:0000771	Gynecomastia	1	28	0.916177126742264
HP:0000972	Palmoplantar hyperkeratosis	1	28	0.916177126742264
HP:0002089	Pulmonary hypoplasia	3	64	0.920393594930312
HP:0100704	Cerebral visual impairment	3	64	0.920393594930312
HP:0001257	Spasticity	18	273	0.921135570109657
HP:0000189	Narrow palate	1	29	0.923064897723132
HP:0000963	Thin skin	1	29	0.923064897723132
HP:0000973	Cutis laxa	1	29	0.923064897723132
HP:0002180	Neurodegeneration	1	29	0.923064897723132
HP:0003124	Hypercholesterolemia	1	29	0.923064897723132
HP:0000076	Vesicoureteral reflux	2	48	0.924182093284192
HP:0001945	Fever	2	48	0.924182093284192
HP:0002133	Status epilepticus	2	48	0.924182093284192
HP:0000543	Optic disc pallor	3	65	0.92510400420814
HP:0000465	Webbed neck	2	49	0.92928716008168
HP:0000044	Hypogonadotrophic hypogonadism	1	30	0.929387922217296
HP:0000098	Tall stature	1	30	0.929387922217296
HP:0000608	Macular degeneration	1	30	0.929387922217296
HP:0001508	Failure to thrive	26	380	0.930119141783773
HP:0001254	Lethargy	3	67	0.933768118844477
HP:0000311	Round face	2	50	0.934066647220118
HP:0001166	Arachnodactyly	2	50	0.934066647220118
HP:0000027	Azoospermia	1	31	0.93519240476477
HP:0001433	Hepatosplenomegaly	1	31	0.93519240476477
HP:0001770	Toe syndactyly	1	31	0.93519240476477
HP:0002162	Low posterior hairline	1	31	0.93519240476477
HP:0004691	2-3 toe syndactyly	1	31	0.93519240476477
HP:0000278	Retrognathia	5	99	0.935632814370107
HP:0008404	Nail dystrophy	3	68	0.937745465872067
HP:0000958	Dry skin	2	51	0.938539520517656
HP:0001256	Intellectual disability, mild	5	100	0.938924220499426
HP:0001539	Omphalocele	1	32	0.940520777923532
HP:0002251	Aganglionic megacolon	1	32	0.940520777923532
HP:0000952	Jaundice	3	69	0.941501443717211
HP:0000767	Pectus excavatum	7	131	0.942276814244026
HP:0000083	Renal insufficiency	4	86	0.943991485559071
HP:0001181	Adducted thumb	1	33	0.94541200952951
HP:0002071	Abnormality of extrapyramidal motor function	1	33	0.94541200952951
HP:0002342	Intellectual disability, moderate	1	33	0.94541200952951
HP:0003025	Metaphyseal irregularity	1	33	0.94541200952951
HP:0000786	Primary amenorrhea	2	53	0.946636727270753
HP:0002023	Anal atresia	2	53	0.946636727270753
HP:0000307	Pointed chin	1	34	0.949901884982369
HP:0002307	Drooling	1	34	0.949901884982369
HP:0010743	Short metatarsal	1	34	0.949901884982369
HP:0010783	Erythema	1	34	0.949901884982369
HP:0001272	Cerebellar atrophy	14	233	0.950236636294164
HP:0000411	Protruding ear	2	54	0.950294501656882
HP:0012368	Flat face	2	54	0.950294501656882
HP:0001939	Abnormality of metabolism/homeostasis	5	104	0.950630779309728
HP:0000482	Microcornea	2	55	0.953712596364747
HP:0000639	Nystagmus	27	407	0.953770683956128
HP:0000444	Convex nasal ridge	1	35	0.954023266582577
HP:0001133	Constriction of peripheral visual field	1	35	0.954023266582577
HP:0001645	Sudden cardiac death	1	35	0.954023266582577
HP:0000341	Narrow forehead	3	73	0.954522335577765
HP:0003745	Sporadic	3	73	0.954522335577765
HP:0025356	Psychomotor retardation	3	73	0.954522335577765
HP:0002059	Cerebral atrophy	12	209	0.956778530122463
HP:0000268	Dolichocephaly	2	56	0.956905642400199
HP:0000327	Hypoplasia of the maxilla	2	56	0.956905642400199
HP:0001395	Hepatic fibrosis	1	36	0.957806331781294
HP:0001987	Hyperammonemia	1	36	0.957806331781294
HP:0002315	Headache	1	36	0.957806331781294
HP:0002812	Coxa vara	1	36	0.957806331781294
HP:0003016	Metaphyseal widening	1	36	0.957806331781294
HP:0000194	Open mouth	2	57	0.95988748691358
HP:0000253	Progressive microcephaly	2	57	0.95988748691358
HP:0000414	Bulbous nose	3	75	0.959967408689706
HP:0000294	Low anterior hairline	1	37	0.961278792053952
HP:0000982	Palmoplantar keratoderma	1	37	0.961278792053952
HP:0002090	Pneumonia	1	37	0.961278792053952
HP:0000337	Broad forehead	2	58	0.962671223265568
HP:0000212	Gingival overgrowth	1	38	0.964466093969915
HP:0001640	Cardiomegaly	1	38	0.964466093969915
HP:0001875	Neutropenia	3	77	0.964796953326183
HP:0000107	Renal cyst	2	59	0.965269221423363
HP:0000577	Exotropia	1	39	0.967391603903265
HP:0000817	Poor eye contact	1	39	0.967391603903265
HP:0000089	Renal hypoplasia	2	60	0.967693158433132
HP:0000510	Rod-cone dystrophy	7	143	0.967822363093598
HP:0000097	Focal segmental glomerulosclerosis	1	40	0.970076777712746
HP:0001773	Short foot	2	62	0.97206227427176
HP:0000303	Mandibular prognathia	4	98	0.972327689446969
HP:0002673	Coxa valga	1	41	0.972541316611307
HP:0009803	Short phalanx of finger	1	41	0.972541316611307
HP:0002205	Recurrent respiratory infections	4	100	0.975482338578647
HP:0000574	Thick eyebrow	2	64	0.975859272261688
HP:0000260	Wide anterior fontanel	1	43	0.976879368724795
HP:0000160	Narrow mouth	4	101	0.97693018483921
HP:0000774	Narrow chest	2	65	0.977565908487269
HP:0000486	Strabismus	18	309	0.977597536664883
HP:0002069	Generalized tonic-clonic seizures	1	44	0.978784742419778
HP:0002716	Lymphadenopathy	1	44	0.978784742419778
HP:0001596	Alopecia	2	66	0.979155663162394
HP:0000964	Eczema	1	45	0.980533433946608
HP:0010049	Short metacarpal	2	67	0.98063618524691
HP:0000490	Deeply set eye	4	105	0.981956238087434
HP:0008551	Microtia	2	68	0.982014657788158
HP:0000962	Hyperkeratosis	1	47	0.98361114303152
HP:0001634	Mitral valve prolapse	1	47	0.98361114303152
HP:0000978	Bruising susceptibility	2	70	0.98449200502992
HP:0000601	Hypotelorism	1	48	0.984962801338198
HP:0000733	Stereotypy	1	48	0.984962801338198
HP:0001268	Mental deterioration	1	48	0.984962801338198
HP:0001878	Hemolytic anemia	1	48	0.984962801338198
HP:0002067	Bradykinesia	1	49	0.986203223951545
HP:0012471	Thick vermilion border	1	49	0.986203223951545
HP:0002123	Generalized myoclonic seizures	1	50	0.987341545228943
HP:0000938	Osteopenia	4	111	0.987598631598918
HP:0002079	Hypoplasia of the corpus callosum	12	239	0.988202403450029
HP:0002353	EEG abnormality	2	75	0.989323156674079
HP:0000565	Esotropia	1	52	0.98934474012138
HP:0000164	Abnormality of the dentition	1	53	0.990224379955596
HP:0000670	Carious teeth	1	53	0.990224379955596
HP:0008897	Postnatal growth retardation	2	77	0.990813615750612
HP:0000179	Thick lower lip vermilion	1	54	0.991031558709019
HP:0000689	Dental malocclusion	1	54	0.991031558709019
HP:0001266	Choreoathetosis	1	54	0.991031558709019
HP:0000505	Visual impairment	5	135	0.991680850102872
HP:0000100	Nephrotic syndrome	1	55	0.991772232473604
HP:0000969	Edema	1	55	0.991772232473604
HP:0007018	Attention deficit hyperactivity disorder	1	55	0.991772232473604
HP:0001388	Joint laxity	3	99	0.991926234468451
HP:0000204	Cleft upper lip	2	79	0.992100448793551
HP:0002714	Downturned corners of mouth	1	56	0.99245186883269
HP:0000126	Hydronephrosis	2	81	0.993210693331383
HP:0000662	Nyctalopia	2	81	0.993210693331383
HP:0012385	Camptodactyly	2	83	0.994167937430369
HP:0002857	Genu valgum	1	59	0.994172718658786
HP:0002750	Delayed skeletal maturation	4	123	0.994262912080737
HP:0000540	Hypermetropia	2	84	0.994595715212093
HP:0000400	Macrotia	3	105	0.994680563124293
HP:0000347	Micrognathia	16	317	0.995023805187479
HP:0000455	Broad nasal tip	1	61	0.995096431894342
HP:0000506	Telecanthus	1	61	0.995096431894342
HP:0000821	Hypothyroidism	1	61	0.995096431894342
HP:0000668	Hypodontia	1	62	0.995501954203061
HP:0000678	Dental crowding	1	62	0.995501954203061
HP:0002553	Highly arched eyebrow	1	63	0.995874012614668
HP:0001513	Obesity	2	89	0.996314192535199
HP:0001537	Umbilical hernia	2	89	0.996314192535199
HP:0002521	Hypsarrhythmia	1	65	0.996528533215945
HP:0000377	Abnormality of the pinna	1	67	0.997079430526004
HP:0001942	Metabolic acidosis	1	67	0.997079430526004
HP:0002510	Spastic tetraplegia	1	67	0.997079430526004
HP:0012448	Delayed myelination	2	93	0.997291827067309
HP:0000739	Anxiety	1	68	0.997321242956579
HP:0000023	Inguinal hernia	3	115	0.997378571243041
HP:0001417	X-linked inheritance	1	69	0.997543077524238
HP:0000175	Cleft palate	10	243	0.997945625552954
HP:0001007	Hirsutism	1	72	0.998104517141808
HP:0001344	Absent speech	6	177	0.998132404923783
HP:0000939	Osteoporosis	2	98	0.998162100731907
HP:0002376	Developmental regression	2	98	0.998162100731907
HP:0000325	Triangular face	1	73	0.998261609544442
HP:0000256	Macrocephaly	6	180	0.998449712050992
HP:0002240	Hepatomegaly	12	281	0.998504493968471
HP:0000248	Brachycephaly	2	101	0.998545245295189
HP:0003774	Stage 5 chronic kidney disease	1	76	0.998659139235738
HP:0000405	Conductive hearing impairment	1	78	0.998872362491766
HP:0001643	Patent ductus arteriosus	3	129	0.999048241522234
HP:0007663	Reduced visual acuity	3	129	0.999048241522234
HP:0000319	Smooth philtrum	1	80	0.999051746204048
HP:0000582	Upslanted palpebral fissure	2	107	0.999090854329302
HP:0004209	Clinodactyly of the 5th finger	1	82	0.999202650203658
HP:0011800	Midface retrusion	4	153	0.9992445674914
HP:0000348	High forehead	1	83	0.999268861780949
HP:0008070	Sparse hair	1	84	0.999329587070837
HP:0000054	Micropenis	3	137	0.999472022314489
HP:0000470	Short neck	5	178	0.999472247756079
HP:0000047	Hypospadias	2	116	0.999553442397118
HP:0000343	Long philtrum	4	162	0.999598202057294
HP:0000093	Proteinuria	1	90	0.999601674798355
HP:0200134	Epileptic encephalopathy	1	90	0.999601674798355
HP:0000219	Thin upper lip vermilion	2	120	0.999675095539577
HP:0000752	Hyperactivity	1	93	0.999693040397498
HP:0000926	Platyspondyly	1	94	0.99971858522016
HP:0002721	Immunodeficiency	1	94	0.99971858522016
HP:0000822	Hypertension	2	123	0.999744244943768
HP:0000272	Malar flattening	3	150	0.999800168069779
HP:0001631	Atrial septal defect	3	150	0.999800168069779
HP:0001999	Abnormal facial shape	1	103	0.999871356047124
HP:0000358	Posteriorly rotated ears	2	134	0.999894219652625
HP:0030084	Clinodactyly	1	112	0.999941277752736
HP:0008936	Muscular hypotonia of the trunk	1	113	0.999946182841948
HP:0000280	Coarse facial features	1	114	0.999950679093182
HP:0000463	Anteverted nares	3	169	0.999953004044054
HP:0000494	Downslanted palpebral fissures	5	214	0.999956177450756
HP:0000286	Epicanthus	5	217	0.999964593947015
HP:0000369	Low-set ears	12	348	0.99996530164368
HP:0000750	Delayed speech and language development	7	268	0.999983100084704
HP:0011220	Prominent forehead	1	129	0.999986703195259
HP:0001903	Anemia	1	131	0.999988838834324
HP:0000252	Microcephaly	25	601	0.999996699431118
HP:0003196	Short nose	1	147	0.999997256695981
HP:0001873	Thrombocytopenia	1	150	0.999997892441067
HP:0001511	Intrauterine growth retardation	3	210	0.999998111134277
HP:0001629	Ventricular septal defect	2	184	0.999998249132372
HP:0001156	Brachydactyly	2	186	0.999998517836262
HP:0005280	Depressed nasal bridge	5	261	0.999998577784403
HP:0000028	Cryptorchidism	6	288	0.999999029918415
HP:0000431	Wide nasal bridge	2	197	0.999999408985403
HP:0001744	Splenomegaly	2	204	0.999999671629093
HP:0004322	Short stature	22	599	0.99999975100421
HP:0001263	Global developmental delay	46	989	0.999999936781449
HP:0002007	Frontal bossing	1	190	0.999999938291648
HP:0001249	Intellectual disability	31	799	0.999999990732697
HP:0000316	Hypertelorism	7	398	0.99999999869826
HP:0001250	Seizures	34	899	0.999999999611361
HP:0000003	Multicystic kidney dysplasia	0	12	1
HP:0000008	Abnormality of female internal genitalia	0	1	1
HP:0000010	Recurrent urinary tract infections	0	23	1
HP:0000013	Hypoplasia of the uterus	0	26	1
HP:0000017	Nocturia	0	2	1
HP:0000019	Urinary hesitancy	0	1	1
HP:0000022	Abnormality of male internal genitalia	0	1	1
HP:0000024	Prostatitis	0	2	1
HP:0000025	Functional abnormality of male internal genitalia	0	1	1
HP:0000026	Male hypogonadism	0	3	1
HP:0000031	Epididymitis	0	3	1
HP:0000032	Abnormality of male external genitalia	0	1	1
HP:0000033	Ambiguous genitalia, male	0	7	1
HP:0000034	Hydrocele testis	0	13	1
HP:0000037	Male pseudohermaphroditism	0	9	1
HP:0000039	Epispadias	0	2	1
HP:0000040	Long penis	0	7	1
HP:0000041	Chordee	0	7	1
HP:0000042	Absent external genitalia	0	2	1
HP:0000046	Scrotal hypoplasia	0	26	1
HP:0000048	Bifid scrotum	0	19	1
HP:0000049	Shawl scrotum	0	12	1
HP:0000051	Perineal hypospadias	0	4	1
HP:0000053	Macroorchidism	0	4	1
HP:0000055	Abnormality of female external genitalia	0	3	1
HP:0000059	Hypoplastic labia majora	0	18	1
HP:0000060	Clitoral hypoplasia	0	6	1
HP:0000061	Ambiguous genitalia, female	0	6	1
HP:0000062	Ambiguous genitalia	0	33	1
HP:0000063	Fused labia minora	0	3	1
HP:0000064	Hypoplastic labia minora	0	5	1
HP:0000065	Labial hypertrophy	0	2	1
HP:0000066	Labial hypoplasia	0	5	1
HP:0000068	Urethral atresia	0	2	1
HP:0000069	Abnormality of the ureter	0	4	1
HP:0000070	Ureterocele	0	2	1
HP:0000071	Ureteral stenosis	0	3	1
HP:0000072	Hydroureter	0	18	1
HP:0000073	Ureteral duplication	0	8	1
HP:0000074	Ureteropelvic junction obstruction	0	8	1
HP:0000075	Renal duplication	0	2	1
HP:0000077	Abnormality of the kidney	0	11	1
HP:0000078	Abnormality of the genital system	0	1	1
HP:0000079	Abnormality of the urinary system	0	10	1
HP:0000081	Duplicated collecting system	0	10	1
HP:0000085	Horseshoe kidney	0	35	1
HP:0000086	Ectopic kidney	0	16	1
HP:0000090	Nephronophthisis	0	37	1
HP:0000091	Abnormal renal tubule morphology	0	2	1
HP:0000092	Tubular atrophy	0	20	1
HP:0000099	Glomerulonephritis	0	8	1
HP:0000103	Polyuria	0	29	1
HP:0000104	Renal agenesis	0	37	1
HP:0000105	Enlarged kidney	0	15	1
HP:0000108	Renal corticomedullary cysts	0	8	1
HP:0000111	Renal juxtaglomerular cell hypertrophy/hyperplasia	0	2	1
HP:0000112	Nephropathy	0	15	1
HP:0000113	Polycystic kidney dysplasia	0	29	1
HP:0000117	Renal phosphate wasting	0	9	1
HP:0000119	Abnormality of the genitourinary system	0	6	1
HP:0000121	Nephrocalcinosis	0	40	1
HP:0000123	Nephritis	0	9	1
HP:0000124	Renal tubular dysfunction	0	7	1
HP:0000125	Pelvic kidney	0	5	1
HP:0000127	Renal salt wasting	0	16	1
HP:0000128	Renal potassium wasting	0	6	1
HP:0000130	Abnormality of the uterus	0	5	1
HP:0000131	Uterine leiomyoma	0	2	1
HP:0000132	Menorrhagia	0	23	1
HP:0000134	Female hypogonadism	0	3	1
HP:0000136	Bifid uterus	0	5	1
HP:0000137	Abnormality of the ovary	0	1	1
HP:0000138	Ovarian cyst	0	8	1
HP:0000139	Uterine prolapse	0	3	1
HP:0000141	Amenorrhea	0	9	1
HP:0000142	Abnormal vagina morphology	0	2	1
HP:0000143	Rectovaginal fistula	0	13	1
HP:0000145	Transverse vaginal septum	0	2	1
HP:0000147	Polycystic ovaries	0	8	1
HP:0000148	Vaginal atresia	0	9	1
HP:0000149	Ovarian gonadoblastoma	0	2	1
HP:0000150	Gonadoblastoma	0	5	1
HP:0000151	Aplasia of the uterus	0	6	1
HP:0000154	Wide mouth	0	92	1
HP:0000155	Oral ulcer	0	8	1
HP:0000161	Median cleft lip	0	8	1
HP:0000166	Severe periodontitis	0	3	1
HP:0000168	Abnormality of the gingiva	0	1	1
HP:0000169	Gingival fibromatosis	0	8	1
HP:0000176	Submucous cleft hard palate	0	9	1
HP:0000178	Abnormality of lower lip	0	1	1
HP:0000180	Lobulated tongue	0	7	1
HP:0000187	Broad alveolar ridges	0	7	1
HP:0000188	Short upper lip	0	6	1
HP:0000190	Abnormal oral frenulum morphology	0	1	1
HP:0000191	Accessory oral frenulum	0	6	1
HP:0000193	Bifid uvula	0	48	1
HP:0000196	Lower lip pit	0	4	1
HP:0000197	Abnormal parotid gland morphology	0	1	1
HP:0000198	Absence of Stensen duct	0	2	1
HP:0000199	Tongue nodules	0	4	1
HP:0000200	Short lingual frenulum	0	3	1
HP:0000202	Oral cleft	0	11	1
HP:0000206	Glossitis	0	2	1
HP:0000207	Triangular mouth	0	11	1
HP:0000214	Lip telangiectasia	0	4	1
HP:0000215	Thick upper lip vermilion	0	13	1
HP:0000216	Broad secondary alveolar ridge	0	2	1
HP:0000220	Velopharyngeal insufficiency	0	6	1
HP:0000221	Furrowed tongue	0	9	1
HP:0000222	Gingival hyperkeratosis	0	1	1
HP:0000225	Gingival bleeding	0	12	1
HP:0000227	Tongue telangiectasia	0	2	1
HP:0000230	Gingivitis	0	7	1
HP:0000234	Abnormality of the head	0	3	1
HP:0000237	Small anterior fontanelle	0	5	1
HP:0000239	Large fontanelles	0	29	1
HP:0000242	Parietal bossing	0	6	1
HP:0000243	Trigonocephaly	0	22	1
HP:0000244	Brachyturricephaly	0	9	1
HP:0000246	Sinusitis	0	20	1
HP:0000250	Dense calvaria	0	3	1
HP:0000262	Turricephaly	0	7	1
HP:0000263	Oxycephaly	0	3	1
HP:0000264	Abnormality of the mastoid	0	1	1
HP:0000265	Mastoiditis	0	4	1
HP:0000267	Cranial asymmetry	0	3	1
HP:0000269	Prominent occiput	0	14	1
HP:0000270	Delayed cranial suture closure	0	26	1
HP:0000271	Abnormality of the face	0	13	1
HP:0000273	Facial grimacing	0	3	1
HP:0000274	Small face	0	9	1
HP:0000282	Facial edema	0	6	1
HP:0000283	Broad face	0	14	1
HP:0000287	Increased facial adipose tissue	0	2	1
HP:0000288	Abnormality of the philtrum	0	2	1
HP:0000289	Broad philtrum	0	9	1
HP:0000290	Abnormality of the forehead	0	2	1
HP:0000292	Loss of facial adipose tissue	0	3	1
HP:0000295	Doll-like facies	0	3	1
HP:0000297	Facial hypotonia	0	21	1
HP:0000306	Abnormality of the chin	0	1	1
HP:0000315	Abnormality of the orbital region	0	3	1
HP:0000317	Facial myokymia	0	4	1
HP:0000320	Bird-like facies	0	3	1
HP:0000321	Square face	0	4	1
HP:0000322	Short philtrum	0	78	1
HP:0000329	Facial hemangioma	0	3	1
HP:0000336	Prominent supraorbital ridges	0	26	1
HP:0000338	Hypomimic face	0	8	1
HP:0000339	Pugilistic facies	0	2	1
HP:0000340	Sloping forehead	0	60	1
HP:0000346	Whistling appearance	0	1	1
HP:0000349	Widow's peak	0	10	1
HP:0000350	Small forehead	0	3	1
HP:0000356	Abnormality of the outer ear	0	6	1
HP:0000362	Otosclerosis	0	3	1
HP:0000363	Abnormality of earlobe	0	1	1
HP:0000364	Hearing abnormality	0	1	1
HP:0000368	Low-set, posteriorly rotated ears	0	15	1
HP:0000370	Abnormality of the middle ear	0	1	1
HP:0000376	Incomplete partition of the cochlea type II	0	3	1
HP:0000378	Cupped ear	0	32	1
HP:0000381	Stapes ankylosis	0	4	1
HP:0000384	Preauricular skin tag	0	23	1
HP:0000385	Small earlobe	0	4	1
HP:0000387	Absent earlobe	0	4	1
HP:0000388	Otitis media	0	18	1
HP:0000389	Chronic otitis media	0	9	1
HP:0000391	Thickened helices	0	8	1
HP:0000394	Lop ear	0	3	1
HP:0000395	Prominent antihelix	0	5	1
HP:0000399	Prelingual sensorineural hearing impairment	0	6	1
HP:0000402	Stenosis of the external auditory canal	0	10	1
HP:0000403	Recurrent otitis media	0	70	1
HP:0000417	Slender nose	0	4	1
HP:0000418	Narrow nasal ridge	0	11	1
HP:0000420	Short nasal septum	0	2	1
HP:0000421	Epistaxis	0	43	1
HP:0000422	Abnormality of the nasal bridge	0	1	1
HP:0000426	Prominent nasal bridge	0	69	1
HP:0000429	Abnormality of the nasal alae	0	1	1
HP:0000434	Nasal mucosa telangiectasia	0	2	1
HP:0000437	Depressed nasal tip	0	14	1
HP:0000445	Wide nose	0	43	1
HP:0000446	Narrow nasal bridge	0	9	1
HP:0000447	Pear-shaped nose	0	3	1
HP:0000448	Prominent nose	0	56	1
HP:0000451	Triangular nasal tip	0	1	1
HP:0000452	Choanal stenosis	0	16	1
HP:0000453	Choanal atresia	0	39	1
HP:0000454	Flared nostrils	0	4	1
HP:0000456	Bifid nasal tip	0	9	1
HP:0000457	Depressed nasal ridge	0	15	1
HP:0000460	Narrow nose	0	16	1
HP:0000466	Limited neck range of motion	0	3	1
HP:0000468	Increased adipose tissue around the neck	0	2	1
HP:0000471	Gastrointestinal angiodysplasia	0	3	1
HP:0000472	Long neck	0	4	1
HP:0000474	Thickened nuchal skin fold	0	5	1
HP:0000475	Broad neck	0	14	1
HP:0000476	Cystic hygroma	0	15	1
HP:0000479	Abnormal retinal morphology	0	1	1
HP:0000480	Retinal coloboma	0	9	1
HP:0000481	Abnormal cornea morphology	0	3	1
HP:0000483	Astigmatism	0	54	1
HP:0000484	Hyperopic astigmatism	0	2	1
HP:0000492	Abnormal eyelid morphology	0	1	1
HP:0000496	Abnormality of eye movement	0	18	1
HP:0000498	Blepharitis	0	11	1
HP:0000502	Abnormal conjunctiva morphology	0	2	1
HP:0000503	Tortuosity of conjunctival vessels	0	2	1
HP:0000504	Abnormality of vision	0	1	1
HP:0000509	Conjunctivitis	0	35	1
HP:0000511	Vertical supranuclear gaze palsy	0	6	1
HP:0000512	Abnormal electroretinogram	0	27	1
HP:0000520	Proptosis	0	105	1
HP:0000526	Aniridia	0	9	1
HP:0000527	Long eyelashes	0	55	1
HP:0000528	Anophthalmia	0	21	1
HP:0000531	Corneal crystals	0	3	1
HP:0000532	Abnormal chorioretinal morphology	0	1	1
HP:0000533	Chorioretinal atrophy	0	14	1
HP:0000534	Abnormal eyebrow morphology	0	1	1
HP:0000535	Sparse and thin eyebrow	0	50	1
HP:0000537	Epicanthus inversus	0	7	1
HP:0000539	Abnormality of refraction	0	2	1
HP:0000542	Impaired ocular adduction	0	2	1
HP:0000548	Cone/cone-rod dystrophy	0	30	1
HP:0000554	Uveitis	0	7	1
HP:0000555	Leukocoria	0	3	1
HP:0000558	Rieger anomaly	0	5	1
HP:0000561	Absent eyelashes	0	16	1
HP:0000563	Keratoconus	0	16	1
HP:0000564	Lacrimal duct atresia	0	4	1
HP:0000567	Chorioretinal coloboma	0	15	1
HP:0000571	Hypometric saccades	0	10	1
HP:0000575	Scotoma	0	6	1
HP:0000579	Nasolacrimal duct obstruction	0	8	1
HP:0000585	Band keratopathy	0	5	1
HP:0000586	Shallow orbits	0	17	1
HP:0000587	Abnormality of the optic nerve	0	1	1
HP:0000588	Optic nerve coloboma	0	11	1
HP:0000591	Abnormal sclera morphology	0	1	1
HP:0000592	Blue sclerae	0	56	1
HP:0000593	Abnormal anterior chamber morphology	0	4	1
HP:0000594	Shallow anterior chamber	0	7	1
HP:0000598	Abnormality of the ear	0	11	1
HP:0000607	Periorbital wrinkles	0	3	1
HP:0000610	Abnormal choroid morphology	0	1	1
HP:0000612	Iris coloboma	0	37	1
HP:0000613	Photophobia	0	99	1
HP:0000614	Abnormal nasolacrimal system morphology	0	1	1
HP:0000617	Abnormality of ocular smooth pursuit	0	2	1
HP:0000619	Impaired convergence	0	1	1
HP:0000620	Dacryocystitis	0	3	1
HP:0000621	Entropion	0	12	1
HP:0000623	Supranuclear ophthalmoplegia	0	4	1
HP:0000625	Eyelid coloboma	0	6	1
HP:0000627	Posterior embryotoxon	0	8	1
HP:0000629	Periorbital fullness	0	18	1
HP:0000632	Lacrimation abnormality	0	2	1
HP:0000633	Decreased lacrimation	0	3	1
HP:0000634	Impaired ocular abduction	0	2	1
HP:0000635	Blue irides	0	19	1
HP:0000636	Upper eyelid coloboma	0	4	1
HP:0000637	Long palpebral fissure	0	22	1
HP:0000643	Blepharospasm	0	11	1
HP:0000646	Amblyopia	0	30	1
HP:0000647	Sclerocornea	0	14	1
HP:0000651	Diplopia	0	14	1
HP:0000652	Lower eyelid coloboma	0	5	1
HP:0000653	Sparse eyelashes	0	50	1
HP:0000656	Ectropion	0	20	1
HP:0000658	Eyelid apraxia	0	3	1
HP:0000660	Lipemia retinalis	0	5	1
HP:0000661	Palpebral fissure narrowing on adduction	0	2	1
HP:0000664	Synophrys	0	71	1
HP:0000667	Phthisis bulbi	0	6	1
HP:0000674	Anodontia	0	7	1
HP:0000675	Macrodontia of permanent maxillary central incisor	0	4	1
HP:0000679	Taurodontia	0	9	1
HP:0000680	Delayed eruption of primary teeth	0	6	1
HP:0000682	Abnormality of dental enamel	0	2	1
HP:0000683	Grayish enamel	0	2	1
HP:0000684	Delayed eruption of teeth	0	48	1
HP:0000685	Hypoplasia of teeth	0	12	1
HP:0000687	Widely spaced teeth	0	49	1
HP:0000690	Agenesis of maxillary lateral incisor	0	3	1
HP:0000691	Microdontia	0	51	1
HP:0000692	Misalignment of teeth	0	11	1
HP:0000694	Shell teeth	0	1	1
HP:0000695	Natal tooth	0	18	1
HP:0000698	Conical tooth	0	15	1
HP:0000699	Diastema	0	9	1
HP:0000700	Periapical bone loss	0	2	1
HP:0000703	Dentinogenesis imperfecta	0	13	1
HP:0000704	Periodontitis	0	9	1
HP:0000705	Amelogenesis imperfecta	0	29	1
HP:0000706	Unerupted tooth	0	4	1
HP:0000710	Hyperorality	0	5	1
HP:0000711	Restlessness	0	11	1
HP:0000713	Agitation	0	20	1
HP:0000717	Autism	0	45	1
HP:0000718	Aggressive behavior	0	120	1
HP:0000719	Inappropriate behavior	0	3	1
HP:0000720	Mood swings	0	5	1
HP:0000721	Lack of spontaneous play	0	6	1
HP:0000722	Obsessive-compulsive behavior	0	24	1
HP:0000723	Restrictive behavior	0	6	1
HP:0000725	Psychotic episodes	0	4	1
HP:0000728	Impaired ability to form peer relationships	0	3	1
HP:0000729	Autistic behavior	0	54	1
HP:0000732	Inflexible adherence to routines or rituals	0	6	1
HP:0000735	Impaired social interactions	0	4	1
HP:0000736	Short attention span	0	12	1
HP:0000740	Episodic paroxysmal anxiety	0	3	1
HP:0000743	Frontal release signs	0	4	1
HP:0000744	Low frustration tolerance	0	3	1
HP:0000748	Inappropriate laughter	0	5	1
HP:0000749	Paroxysmal bursts of laughter	0	2	1
HP:0000756	Agoraphobia	0	2	1
HP:0000757	Lack of insight	0	3	1
HP:0000758	Impaired use of nonverbal behaviors	0	6	1
HP:0000766	Abnormality of the sternum	0	20	1
HP:0000769	Abnormality of the breast	0	1	1
HP:0000772	Abnormality of the ribs	0	9	1
HP:0000773	Short ribs	0	52	1
HP:0000775	Abnormality of the diaphragm	0	2	1
HP:0000776	Congenital diaphragmatic hernia	0	32	1
HP:0000777	Abnormality of the thymus	0	4	1
HP:0000778	Hypoplasia of the thymus	0	9	1
HP:0000782	Abnormality of the scapula	0	2	1
HP:0000787	Nephrolithiasis	0	41	1
HP:0000789	Infertility	0	56	1
HP:0000790	Hematuria	0	34	1
HP:0000791	Uric acid nephrolithiasis	0	2	1
HP:0000793	Membranoproliferative glomerulonephritis	0	5	1
HP:0000794	IgA deposition in the glomerulus	0	3	1
HP:0000799	Renal steatosis	0	3	1
HP:0000800	Cystic renal dysplasia	0	6	1
HP:0000803	Renal cortical cysts	0	5	1
HP:0000804	Xanthine nephrolithiasis	0	3	1
HP:0000805	Enuresis	0	9	1
HP:0000807	Glandular hypospadias	0	1	1
HP:0000808	Penoscrotal hypospadias	0	5	1
HP:0000812	Abnormal internal genitalia	0	1	1
HP:0000813	Bicornuate uterus	0	16	1
HP:0000818	Abnormality of the endocrine system	0	4	1
HP:0000820	Abnormality of the thyroid gland	0	3	1
HP:0000825	Hyperinsulinemic hypoglycemia	0	11	1
HP:0000826	Precocious puberty	0	17	1
HP:0000829	Hypoparathyroidism	0	10	1
HP:0000830	Anterior hypopituitarism	0	2	1
HP:0000831	Insulin-resistant diabetes mellitus	0	8	1
HP:0000832	Primary hypothyroidism	0	1	1
HP:0000835	Adrenal hypoplasia	0	13	1
HP:0000837	Increased circulating gonadotropin level	0	8	1
HP:0000839	Pituitary dwarfism	0	6	1
HP:0000840	Adrenogenital syndrome	0	5	1
HP:0000841	Hyperactive renin-angiotensin system	0	6	1
HP:0000843	Hyperparathyroidism	0	6	1
HP:0000845	Growth hormone excess	0	7	1
HP:0000846	Adrenal insufficiency	0	13	1
HP:0000848	Increased circulating renin level	0	10	1
HP:0000851	Congenital hypothyroidism	0	14	1
HP:0000852	Pseudohypoparathyroidism	0	5	1
HP:0000854	Thyroid adenoma	0	4	1
HP:0000857	Neonatal insulin-dependent diabetes mellitus	0	1	1
HP:0000858	Menstrual irregularities	0	7	1
HP:0000859	Hyperaldosteronism	0	12	1
HP:0000860	Parathyroid hypoplasia	0	2	1
HP:0000863	Central diabetes insipidus	0	3	1
HP:0000866	Euthyroid multinodular goiter	0	1	1
HP:0000867	Secondary hyperparathyroidism	0	2	1
HP:0000868	Decreased fertility in females	0	3	1
HP:0000869	Secondary amenorrhea	0	13	1
HP:0000871	Panhypopituitarism	0	7	1
HP:0000872	Hashimoto thyroiditis	0	6	1
HP:0000873	Diabetes insipidus	0	10	1
HP:0000875	Episodic hypertension	0	1	1
HP:0000876	Oligomenorrhea	0	12	1
HP:0000877	Insulin-resistant diabetes mellitus at puberty	0	2	1
HP:0000878	11 pairs of ribs	0	15	1
HP:0000879	Short sternum	0	8	1
HP:0000882	Hypoplastic scapulae	0	19	1
HP:0000884	Prominent sternum	0	7	1
HP:0000885	Broad ribs	0	13	1
HP:0000886	Deformed rib cage	0	4	1
HP:0000887	Cupped ribs	0	4	1
HP:0000888	Horizontal ribs	0	10	1
HP:0000890	Long clavicles	0	9	1
HP:0000891	Cervical ribs	0	5	1
HP:0000892	Bifid ribs	0	2	1
HP:0000893	Bulging of the costochondral junction	0	4	1
HP:0000894	Short clavicles	0	26	1
HP:0000895	Lateral clavicle hook	0	14	1
HP:0000896	Rib exostoses	0	2	1
HP:0000897	Rachitic rosary	0	3	1
HP:0000900	Thickened ribs	0	6	1
HP:0000902	Rib fusion	0	13	1
HP:0000904	Flaring of rib cage	0	3	1
HP:0000905	Progressive clavicular acroosteolysis	0	3	1
HP:0000907	Anterior rib cupping	0	8	1
HP:0000910	Wide-cupped costochondral junctions	0	2	1
HP:0000911	Flat glenoid fossa	0	2	1
HP:0000912	Sprengel anomaly	0	7	1
HP:0000913	Posterior rib fusion	0	1	1
HP:0000914	Shield chest	0	10	1
HP:0000915	Pectus excavatum of inferior sternum	0	3	1
HP:0000916	Broad clavicles	0	6	1
HP:0000917	Superior pectus carinatum	0	2	1
HP:0000918	Scapular exostoses	0	2	1
HP:0000920	Enlargement of the costochondral junction	0	6	1
HP:0000921	Missing ribs	0	8	1
HP:0000922	Posterior rib cupping	0	5	1
HP:0000923	Beaded ribs	0	5	1
HP:0000925	Abnormality of the vertebral column	0	11	1
HP:0000932	Abnormality of the posterior cranial fossa	0	1	1
HP:0000934	Chondrocalcinosis	0	8	1
HP:0000935	Thickened cortex of long bones	0	6	1
HP:0000941	Short diaphyses	0	1	1
HP:0000943	Dysostosis multiplex	0	19	1
HP:0000946	Hypoplastic ilia	0	14	1
HP:0000947	Dumbbell-shaped long bone	0	3	1
HP:0000954	Single transverse palmar crease	0	64	1
HP:0000957	Cafe-au-lait spot	0	42	1
HP:0000960	Sacral dimple	0	25	1
HP:0000961	Cyanosis	0	15	1
HP:0000965	Cutis marmorata	0	27	1
HP:0000967	Petechiae	0	18	1
HP:0000968	Ectodermal dysplasia	0	23	1
HP:0000976	Eczematoid dermatitis	0	8	1
HP:0000979	Purpura	0	13	1
HP:0000987	Atypical scarring of skin	0	6	1
HP:0000988	Skin rash	0	19	1
HP:0000991	Xanthomatosis	0	5	1
HP:0000992	Cutaneous photosensitivity	0	40	1
HP:0000993	Molluscoid pseudotumors	0	5	1
HP:0000995	Melanocytic nevus	0	7	1
HP:0000996	Facial capillary hemangioma	0	2	1
HP:0000997	Axillary freckling	0	5	1
HP:0000998	Hypertrichosis	0	32	1
HP:0000999	Pyoderma	0	4	1
HP:0001000	Abnormality of skin pigmentation	0	18	1
HP:0001003	Multiple lentigines	0	7	1
HP:0001004	Lymphedema	0	25	1
HP:0001006	Hypotrichosis	0	28	1
HP:0001008	Accumulation of melanosomes in melanocytes	0	2	1
HP:0001009	Telangiectasia	0	25	1
HP:0001010	Hypopigmentation of the skin	0	19	1
HP:0001013	Eruptive xanthomas	0	3	1
HP:0001014	Angiokeratoma	0	3	1
HP:0001015	Prominent superficial veins	0	7	1
HP:0001017	Anemic pallor	0	4	1
HP:0001018	Abnormal palmar dermatoglyphics	0	2	1
HP:0001019	Erythroderma	0	17	1
HP:0001022	Albinism	0	18	1
HP:0001024	Skin dimple over apex of long bone angulation	0	2	1
HP:0001025	Urticaria	0	11	1
HP:0001027	Soft, doughy skin	0	4	1
HP:0001028	Hemangioma	0	12	1
HP:0001030	Fragile skin	0	23	1
HP:0001031	Subcutaneous lipoma	0	5	1
HP:0001032	Absent distal interphalangeal creases	0	5	1
HP:0001033	Facial flushing after alcohol intake	0	1	1
HP:0001034	Hypermelanotic macule	0	15	1
HP:0001036	Parakeratosis	0	20	1
HP:0001038	Warfarin-induced skin necrosis	0	2	1
HP:0001039	Atheroeruptive xanthoma	0	1	1
HP:0001040	Multiple pterygia	0	2	1
HP:0001041	Facial erythema	0	4	1
HP:0001042	High axial triradius	0	1	1
HP:0001043	Prominent scalp veins	0	3	1
HP:0001045	Vitiligo	0	8	1
HP:0001046	Intermittent jaundice	0	2	1
HP:0001047	Atopic dermatitis	0	7	1
HP:0001048	Cavernous hemangioma	0	3	1
HP:0001050	Plethora	0	2	1
HP:0001051	Seborrheic dermatitis	0	9	1
HP:0001052	Nevus flammeus	0	6	1
HP:0001054	Numerous nevi	0	5	1
HP:0001057	Aplasia cutis congenita	0	11	1
HP:0001059	Pterygium	0	5	1
HP:0001060	Axillary pterygium	0	5	1
HP:0001061	Acne	0	11	1
HP:0001062	Atypical nevus	0	1	1
HP:0001065	Striae distensae	0	11	1
HP:0001067	Neurofibromas	0	3	1
HP:0001070	Mottled pigmentation	0	4	1
HP:0001071	Angiokeratoma corporis diffusum	0	3	1
HP:0001072	Thickened skin	0	13	1
HP:0001073	Cigarette-paper scars	0	4	1
HP:0001074	Atypical nevi in non-sun exposed areas	0	1	1
HP:0001075	Atrophic scars	0	16	1
HP:0001076	Glabellar hemangioma	0	2	1
HP:0001080	Biliary tract abnormality	0	7	1
HP:0001082	Cholecystitis	0	8	1
HP:0001083	Ectopia lentis	0	21	1
HP:0001084	Corneal arcus	0	5	1
HP:0001085	Papilledema	0	5	1
HP:0001087	Developmental glaucoma	0	6	1
HP:0001088	Brushfield spots	0	4	1
HP:0001089	Iris atrophy	0	4	1
HP:0001092	Absent lacrimal punctum	0	4	1
HP:0001094	Iridocyclitis	0	1	1
HP:0001095	Hypertensive retinopathy	0	2	1
HP:0001096	Keratoconjunctivitis	0	1	1
HP:0001099	Fundus atrophy	0	3	1
HP:0001101	Iritis	0	1	1
HP:0001102	Angioid streaks of the fundus	0	8	1
HP:0001103	Abnormal macular morphology	0	2	1
HP:0001104	Macular hypoplasia	0	7	1
HP:0001106	Periorbital hyperpigmentation	0	2	1
HP:0001107	Ocular albinism	0	14	1
HP:0001114	Xanthelasma	0	8	1
HP:0001115	Posterior polar cataract	0	7	1
HP:0001116	Macular coloboma	0	3	1
HP:0001118	Juvenile cataract	0	2	1
HP:0001119	Keratoglobus	0	3	1
HP:0001123	Visual field defect	0	16	1
HP:0001125	Transient unilateral blurring of vision	0	2	1
HP:0001126	Cryptophthalmos	0	5	1
HP:0001128	Trichiasis	0	1	1
HP:0001131	Corneal dystrophy	0	17	1
HP:0001132	Lens subluxation	0	5	1
HP:0001134	Anterior polar cataract	0	2	1
HP:0001135	Chorioretinal dystrophy	0	4	1
HP:0001136	Retinal arteriolar tortuosity	0	4	1
HP:0001137	Alternating esotropia	0	2	1
HP:0001139	Choroideremia	0	2	1
HP:0001140	Limbal dermoid	0	3	1
HP:0001141	Severely reduced visual acuity	0	9	1
HP:0001142	Lenticonus	0	2	1
HP:0001144	Orbital cyst	0	3	1
HP:0001147	Retinal exudate	0	4	1
HP:0001153	Septate vagina	0	6	1
HP:0001159	Syndactyly	0	74	1
HP:0001161	Hand polydactyly	0	6	1
HP:0001162	Postaxial hand polydactyly	0	59	1
HP:0001163	Abnormality of the metacarpal bones	0	1	1
HP:0001167	Abnormality of finger	0	1	1
HP:0001172	Abnormal thumb morphology	0	1	1
HP:0001176	Large hands	0	18	1
HP:0001177	Preaxial hand polydactyly	0	14	1
HP:0001180	Hand oligodactyly	0	7	1
HP:0001191	Abnormality of the carpal bones	0	4	1
HP:0001193	Ulnar deviation of the hand or of fingers of the hand	0	10	1
HP:0001194	Abnormalities of placenta or umbilical cord	0	1	1
HP:0001195	Single umbilical artery	0	10	1
HP:0001196	Short umbilical cord	0	4	1
HP:0001199	Triphalangeal thumb	0	16	1
HP:0001204	Distal symphalangism of hands	0	4	1
HP:0001212	Prominent fingertip pads	0	9	1
HP:0001215	Camptodactyly of 2nd-5th fingers	0	1	1
HP:0001216	Delayed ossification of carpal bones	0	12	1
HP:0001217	Clubbing	0	18	1
HP:0001220	Interphalangeal joint contracture of finger	0	1	1
HP:0001222	Spatulate thumbs	0	2	1
HP:0001223	Pointed proximal second through fifth metacarpals	0	2	1
HP:0001225	Wrist swelling	0	2	1
HP:0001230	Broad metacarpals	0	6	1
HP:0001232	Nail bed telangiectasia	0	2	1
HP:0001233	2-3 finger syndactyly	0	5	1
HP:0001234	Hitchhiker thumb	0	3	1
HP:0001238	Slender finger	0	10	1
HP:0001241	Capitate-hamate fusion	0	5	1
HP:0001245	Small thenar eminence	0	5	1
HP:0001248	Short tubular bones of the hand	0	1	1
HP:0001259	Coma	0	39	1
HP:0001264	Spastic diplegia	0	19	1
HP:0001281	Tetany	0	11	1
HP:0001287	Meningitis	0	19	1
HP:0001289	Confusion	0	16	1
HP:0001297	Stroke	0	31	1
HP:0001304	Torsion dystonia	0	5	1
HP:0001311	Abnormal nervous system electrophysiology	0	3	1
HP:0001312	Giant somatosensory evoked potentials	0	2	1
HP:0001325	Hypoglycemic coma	0	8	1
HP:0001326	EEG with irregular generalized spike and wave complexes	0	2	1
HP:0001331	Absent septum pellucidum	0	11	1
HP:0001334	Communicating hydrocephalus	0	3	1
HP:0001335	Bimanual synkinesia	0	11	1
HP:0001339	Lissencephaly	0	15	1
HP:0001340	Enhancement of the C-reflex	0	2	1
HP:0001341	Olfactory lobe agenesis	0	3	1
HP:0001342	Cerebral hemorrhage	0	15	1
HP:0001343	Kernicterus	0	2	1
HP:0001345	Psychotic mentation	0	2	1
HP:0001351	Jerk-locked premyoclonus spikes	0	2	1
HP:0001355	Megalencephaly	0	14	1
HP:0001361	Nystagmus-induced head nodding	0	1	1
HP:0001362	Calvarial skull defect	0	5	1
HP:0001363	Craniosynostosis	0	52	1
HP:0001367	Abnormal joint morphology	0	5	1
HP:0001369	Arthritis	0	29	1
HP:0001370	Rheumatoid arthritis	0	1	1
HP:0001373	Joint dislocation	0	11	1
HP:0001376	Limitation of joint mobility	0	8	1
HP:0001386	Joint swelling	0	5	1
HP:0001387	Joint stiffness	0	28	1
HP:0001392	Abnormality of the liver	0	7	1
HP:0001401	Intrahepatic biliary dysgenesis	0	3	1
HP:0001402	Hepatocellular carcinoma	0	17	1
HP:0001406	Intrahepatic cholestasis	0	12	1
HP:0001407	Hepatic cysts	0	15	1
HP:0001412	Enteroviral hepatitis	0	2	1
HP:0001426	Multifactorial inheritance	0	21	1
HP:0001428	Somatic mutation	0	69	1
HP:0001440	Metatarsal synostosis	0	3	1
HP:0001442	Somatic mosaicism	0	7	1
HP:0001450	Y-linked inheritance	0	3	1
HP:0001452	Autosomal dominant contiguous gene syndrome	0	2	1
HP:0001459	1-3 toe syndactyly	0	1	1
HP:0001466	Contiguous gene syndrome	0	2	1
HP:0001470	Sex-limited autosomal dominant	0	4	1
HP:0001473	Metatarsal osteolysis	0	2	1
HP:0001474	Sclerotic scapulae	0	1	1
HP:0001476	Delayed closure of the anterior fontanelle	0	16	1
HP:0001477	Compensatory chin elevation	0	2	1
HP:0001480	Freckling	0	12	1
HP:0001482	Subcutaneous nodule	0	6	1
HP:0001483	Eye poking	0	2	1
HP:0001489	Posterior vitreous detachment	0	3	1
HP:0001491	Congenital fibrosis of extraocular muscles	0	4	1
HP:0001492	Axenfeld anomaly	0	3	1
HP:0001493	Falciform retinal fold	0	3	1
HP:0001495	Carpal osteolysis	0	2	1
HP:0001498	Carpal bone hypoplasia	0	12	1
HP:0001500	Broad finger	0	3	1
HP:0001501	6 metacarpals	0	2	1
HP:0001504	Metacarpal osteolysis	0	2	1
HP:0001519	Disproportionate tall stature	0	16	1
HP:0001520	Large for gestational age	0	16	1
HP:0001525	Severe failure to thrive	0	5	1
HP:0001528	Hemihypertrophy	0	7	1
HP:0001530	Mild postnatal growth retardation	0	4	1
HP:0001531	Failure to thrive in infancy	0	15	1
HP:0001538	Protuberant abdomen	0	20	1
HP:0001543	Gastroschisis	0	2	1
HP:0001545	Anteriorly placed anus	0	21	1
HP:0001551	Abnormal umbilicus morphology	0	2	1
HP:0001555	Asymmetry of the thorax	0	1	1
HP:0001557	Prenatal movement abnormality	0	1	1
HP:0001563	Fetal polyuria	0	5	1
HP:0001566	Widely-spaced maxillary central incisors	0	4	1
HP:0001571	Multiple impacted teeth	0	3	1
HP:0001572	Macrodontia	0	4	1
HP:0001574	Abnormality of the integument	0	2	1
HP:0001575	Mood changes	0	5	1
HP:0001579	Primary hypercortisolism	0	4	1
HP:0001580	Pigmented micronodular adrenocortical disease	0	2	1
HP:0001581	Recurrent skin infections	0	12	1
HP:0001582	Redundant skin	0	17	1
HP:0001583	Rotary nystagmus	0	6	1
HP:0001586	Vesicovaginal fistula	0	2	1
HP:0001591	Bell-shaped thorax	0	16	1
HP:0001592	Selective tooth agenesis	0	11	1
HP:0001595	Abnormal hair morphology	0	15	1
HP:0001597	Abnormality of the nail	0	7	1
HP:0001600	Abnormality of the larynx	0	5	1
HP:0001601	Laryngomalacia	0	17	1
HP:0001602	Laryngeal stenosis	0	2	1
HP:0001607	Subglottic stenosis	0	7	1
HP:0001608	Abnormality of the voice	0	8	1
HP:0001615	Hoarse cry	0	5	1
HP:0001627	Abnormal heart morphology	0	37	1
HP:0001633	Abnormal mitral valve morphology	0	1	1
HP:0001636	Tetralogy of Fallot	0	43	1
HP:0001641	Abnormal pulmonary valve morphology	0	1	1
HP:0001646	Abnormal aortic valve morphology	0	3	1
HP:0001647	Bicuspid aortic valve	0	39	1
HP:0001648	Cor pulmonale	0	3	1
HP:0001650	Aortic valve stenosis	0	35	1
HP:0001651	Dextrocardia	0	11	1
HP:0001653	Mitral regurgitation	0	45	1
HP:0001654	Abnormal heart valve morphology	0	5	1
HP:0001658	Myocardial infarction	0	15	1
HP:0001659	Aortic regurgitation	0	27	1
HP:0001660	Truncus arteriosus	0	9	1
HP:0001663	Ventricular fibrillation	0	23	1
HP:0001664	Torsade de pointes	0	10	1
HP:0001670	Asymmetric septal hypertrophy	0	8	1
HP:0001674	Complete atrioventricular canal defect	0	8	1
HP:0001677	Coronary artery atherosclerosis	0	7	1
[truncated: 4,386 more rows]
