# Supplementary material for: Decoding Neuromuscular Disorders Using Phenotypic Clusters Obtained From Co-Occurrence Networks
Source: Front Mol Biosci. 2021 Apr 19;8:635074. doi: 10.3389/fmolb.2021.635074 (PMC8147726; doi:10.3389/fmolb.2021.635074)
Supplement: Supplementary file 1 [file DataSheet1.zip › Sup4-Orphanet_phenotypes.csv]

HPO	Phenotype description	NMD counts	Non-NMD counts	P-value
HP:0003236	Elevated serum creatine kinase	40	23	3.04723322362442e-35
HP:0003551	Difficulty climbing stairs	20	5	7.28780596061543e-21
HP:0003457	EMG abnormality	25	17	7.38062136128714e-21
HP:0003458	EMG: myopathic abnormalities	25	18	1.67672725458216e-20
HP:0008981	Calf muscle hypertrophy	17	5	2.2900237970879e-17
HP:0002515	Waddling gait	19	13	5.85475373048099e-16
HP:0003557	Increased variability in muscle fiber diameter	17	9	2.19921470582595e-15
HP:0003198	Myopathy	24	36	7.73090409834756e-15
HP:0003391	Gowers sign	13	2	1.11786632043873e-14
HP:0003805	Rimmed vacuoles	13	2	1.11786632043873e-14
HP:0009027	Foot dorsiflexor weakness	15	13	6.9704362416135e-12
HP:0003749	Pelvic girdle muscle weakness	9	0	1.08630361859254e-11
HP:0001638	Cardiomyopathy	19	31	1.99116070330732e-11
HP:0003691	Scapular winging	14	12	3.38849018922208e-11
HP:0008180	Mildly elevated creatine kinase	13	9	3.635239678221e-11
HP:0002747	Respiratory insufficiency due to muscle weakness	12	7	7.21647111220988e-11
HP:0003803	Type 1 muscle fiber predominance	12	7	7.21647111220988e-11
HP:0003326	Myalgia	20	41	1.30583883299161e-10
HP:0002486	Myotonia	10	3	1.53772105539445e-10
HP:0003394	Muscle spasm	17	27	1.85940692922208e-10
HP:0003202	Skeletal muscle atrophy	24	66	2.02240216991671e-10
HP:0002355	Difficulty walking	24	67	2.60859334295461e-10
HP:0003547	Shoulder girdle muscle weakness	10	4	5.09966625507418e-10
HP:0009073	Progressive proximal muscle weakness	10	5	1.44963831028833e-09
HP:0003306	Spinal rigidity	11	8	1.79101150221257e-09
HP:0003738	Exercise-induced myalgia	9	3	2.03380471980828e-09
HP:0001270	Motor delay	21	61	7.2345177126264e-09
HP:0012548	Fatty replacement of skeletal muscle	8	2	7.48878830302631e-09
HP:0003307	Hyperlordosis	17	38	1.02912473282789e-08
HP:0030099	Reduced muscle fiber alpha dystroglycan	6	0	5.258625329363e-08
HP:0001315	Reduced tendon reflexes	13	23	7.94760116291686e-08
HP:0003327	Axial muscle weakness	8	5	1.82421340810925e-07
HP:0002460	Distal muscle weakness	11	17	3.13180703887357e-07
HP:0003324	Generalized muscle weakness	11	17	3.13180703887357e-07
HP:0003325	Limb-girdle muscle weakness	7	3	3.20632109701755e-07
HP:0003722	Neck flexor weakness	7	3	3.20632109701755e-07
HP:0002792	Reduced vital capacity	6	1	3.49304318054709e-07
HP:0007126	Proximal amyotrophy	6	1	3.49304318054709e-07
HP:0008997	Proximal muscle weakness in upper limbs	8	6	4.03488570212899e-07
HP:0009046	Difficulty running	9	10	5.86243556341113e-07
HP:0008994	Proximal muscle weakness in lower limbs	8	7	8.19615119675439e-07
HP:0001771	Achilles tendon contracture	7	4	8.36189092954862e-07
HP:0003798	Nemaline bodies	6	2	1.32590915564762e-06
HP:0003701	Proximal muscle weakness	10	16	1.41764797409125e-06
HP:0001349	Facial diplegia	7	5	1.90323037536722e-06
HP:0006957	Loss of ability to walk	7	5	1.90323037536722e-06
HP:0003560	Muscular dystrophy	8	9	2.78251948931688e-06
HP:0002058	Myopathic facies	6	3	3.77486389749757e-06
HP:0003687	Centrally nucleated skeletal muscle fibers	6	3	3.77486389749757e-06
HP:0006785	Limb-girdle muscular dystrophy	6	3	3.77486389749757e-06
HP:0002913	Myoglobinuria	5	1	4.99134809154829e-06
HP:0030200	Fatiguable weakness of proximal limb muscles	5	1	4.99134809154829e-06
HP:0001558	Decreased fetal movement	9	15	6.34406911024635e-06
HP:0000467	Neck muscle weakness	7	7	7.41819326115288e-06
HP:0003546	Exercise intolerance	7	7	7.41819326115288e-06
HP:0040083	Toe walking	8	11	7.7748589876331e-06
HP:0000602	Ophthalmoplegia	10	22	1.24645009996688e-05
HP:0001319	Neonatal hypotonia	10	22	1.24645009996688e-05
HP:0001644	Dilated cardiomyopathy	11	28	1.35051528776521e-05
HP:0008316	Abnormal mitochondria in muscle tissue	4	0	1.44708021663403e-05
HP:0030192	Fatigable weakness of bulbar muscles	4	0	1.44708021663403e-05
HP:0003323	Progressive muscle weakness	5	2	1.65964575252822e-05
HP:0002987	Elbow flexion contracture	7	9	2.22437393078243e-05
HP:0001265	Hyporeflexia	15	59	2.86811820756687e-05
HP:0000590	Progressive external ophthalmoplegia	6	6	3.54972467499828e-05
HP:0003200	Ragged-red muscle fibers	7	10	3.58665931807797e-05
HP:0002359	Frequent falls	11	32	3.73552592121047e-05
HP:0003707	Calf muscle pseudohypertrophy	5	3	4.20473714746731e-05
HP:0031374	Ankle weakness	4	1	6.88511579263572e-05
HP:0100297	Increased endomysial connective tissue	4	1	6.88511579263572e-05
HP:0002047	Malignant hyperthermia	6	8	0.000103936145618055
HP:0001284	Areflexia	11	37	0.000112067977702006
HP:0002015	Dysphagia	19	103	0.000116091083511438
HP:0003388	Easy fatigability	7	13	0.000122012421068922
HP:0003273	Hip contracture	5	5	0.000170819800313094
HP:0008954	Intrinsic hand muscle atrophy	5	5	0.000170819800313094
HP:0008959	Distal upper limb muscle weakness	5	5	0.000170819800313094
HP:0008963	Tibialis muscle weakness	4	2	0.000196570777595976
HP:0012240	Increased intramyocellular lipid droplets	4	2	0.000196570777595976
HP:0030196	Fatigable weakness of respiratory muscles	4	2	0.000196570777595976
HP:0002193	Pseudobulbar behavioral symptoms	3	0	0.000237297625768361
HP:0003089	Hamstring contractures	3	0	0.000237297625768361
HP:0003752	Episodic flaccid weakness	3	0	0.000237297625768361
HP:0003756	Skeletal myopathy	3	0	0.000237297625768361
HP:0003797	Limb-girdle muscle atrophy	3	0	0.000237297625768361
HP:0008978	Necrotizing myopathy	3	0	0.000237297625768361
HP:0000298	Mask-like facies	7	15	0.000241550787135412
HP:0040081	Abnormal circulating creatine kinase concentration	5	6	0.000297586101771776
HP:0001290	Generalized hypotonia	16	85	0.000346634686517181
HP:0003128	Lactic acidosis	6	11	0.000366406565789121
HP:0010628	Facial palsy	9	29	0.000373583515523109
HP:0003690	Limb muscle weakness	4	3	0.000436536537690233
HP:0009020	Exercise-induced muscle fatigue	4	3	0.000436536537690233
HP:0011712	Right bundle branch block	4	3	0.000436536537690233
HP:0000508	Ptosis	20	126	0.000462067187820047
HP:0002878	Respiratory failure	8	24	0.000541468703351231
HP:0000597	Ophthalmoparesis	5	8	0.000748680625470892
HP:0007340	Lower limb muscle weakness	7	19	0.000754735856496431
HP:0000544	External ophthalmoplegia	4	4	0.000831025703905793
HP:0003737	Mitochondrial myopathy	4	4	0.000831025703905793
HP:0100295	Muscle fiber atrophy	4	4	0.000831025703905793
HP:0001436	Abnormality of the foot musculature	3	1	0.000905778096574425
HP:0003555	Muscle fiber splitting	3	1	0.000905778096574425
HP:0003741	Congenital muscular dystrophy	3	1	0.000905778096574425
HP:0007354	Amyotrophic lateral sclerosis	3	1	0.000905778096574425
HP:0008153	Periodic hypokalemic paresis	3	1	0.000905778096574425
HP:0012515	Hip flexor weakness	3	1	0.000905778096574425
HP:0030046	Hypoglycosylation of alpha-dystroglycan	3	1	0.000905778096574425
HP:0031237	Internally nucleated skeletal muscle fibers	3	1	0.000905778096574425
HP:0002540	Inability to walk	7	20	0.000966712072723109
HP:0003700	Generalized amyotrophy	5	9	0.00110687200316691
HP:0009055	Generalized limb muscle atrophy	4	5	0.00142393586227351
HP:0002938	Lumbar hyperlordosis	5	10	0.00157809186644697
HP:0001239	Wrist flexion contracture	3	2	0.00216116850454653
HP:0002522	Areflexia of lower limbs	3	2	0.00216116850454653
HP:0005150	Abnormal atrioventricular conduction	3	2	0.00216116850454653
HP:0006466	Ankle flexion contracture	5	11	0.00218188571529278
HP:0009053	Distal lower limb muscle weakness	6	17	0.00218954310517581
HP:0004326	Cachexia	7	24	0.00232050018910214
HP:0002093	Respiratory insufficiency	13	75	0.00249184857100135
HP:0002804	Arthrogryposis multiplex congenita	7	25	0.00281862900511239
HP:0002380	Fasciculations	5	12	0.00293833536091931
HP:0001678	Atrioventricular block	4	7	0.00338035255223304
HP:0002153	Hyperkalemia	4	7	0.00338035255223304
HP:0003712	Skeletal muscle hypertrophy	4	7	0.00338035255223304
HP:0030319	Weakness of facial musculature	4	7	0.00338035255223304
HP:0002350	Cerebellar cyst	2	0	0.00386182749032704
HP:0003044	Shoulder flexion contracture	2	0	0.00386182749032704
HP:0003694	Late-onset proximal muscle weakness	2	0	0.00386182749032704
HP:0003730	EMG: myotonic runs	2	0	0.00386182749032704
HP:0005085	Limited knee flexion/extension	2	0	0.00386182749032704
HP:0005855	Multiple prenatal fractures	2	0	0.00386182749032704
HP:0008049	Abnormality of the extraocular muscles	2	0	0.00386182749032704
HP:0010548	Percussion myotonia	2	0	0.00386182749032704
HP:0012507	Weakness of orbicularis oculi muscle	2	0	0.00386182749032704
HP:0012726	Episodic hypokalemia	2	0	0.00386182749032704
HP:0025169	Left ventricular systolic dysfunction	2	0	0.00386182749032704
HP:0030007	EMG: positive sharp waves	2	0	0.00386182749032704
HP:0031177	Finger flexor weakness	2	0	0.00386182749032704
HP:0040131	Abnormal motor nerve conduction velocity	2	0	0.00386182749032704
HP:0100284	EMG: myotonic discharges	2	0	0.00386182749032704
HP:0100748	Muscular edema	2	0	0.00386182749032704
HP:0001288	Gait disturbance	15	100	0.00410753111584124
HP:0001283	Bulbar palsy	3	3	0.00412576623149707
HP:0003201	Rhabdomyolysis	3	3	0.00412576623149707
HP:0004756	Ventricular tachycardia	3	3	0.00412576623149707
HP:0008331	Elevated creatine kinase after exercise	3	3	0.00412576623149707
HP:0009077	Weakness of long finger extensor muscles	3	3	0.00412576623149707
HP:0003552	Muscle stiffness	6	20	0.00427707398279643
HP:0002375	Hypokinesia	4	8	0.00482813261495589
HP:0002421	Poor head control	6	22	0.00631377673113894
HP:0001663	Ventricular fibrillation	3	4	0.00689268850185221
HP:0008081	Pes valgus	3	4	0.00689268850185221
HP:0001712	Left ventricular hypertrophy	4	10	0.00885496254201769
HP:0001488	Bilateral ptosis	5	17	0.00971699496601874
HP:0002828	Multiple joint contractures	5	17	0.00971699496601874
HP:0003693	Distal amyotrophy	5	17	0.00971699496601874
HP:0001612	Weak cry	3	5	0.0105296861806201
HP:0009005	Weakness of the intrinsic hand muscles	3	5	0.0105296861806201
HP:0009063	Progressive distal muscle weakness	3	5	0.0105296861806201
HP:0001623	Breech presentation	2	1	0.0111108872194444
HP:0002111	Restrictive deficit on pulmonary function testing	2	1	0.0111108872194444
HP:0002203	Respiratory paralysis	2	1	0.0111108872194444
HP:0003715	Myofibrillar myopathy	2	1	0.0111108872194444
HP:0003736	Autophagic vacuoles	2	1	0.0111108872194444
HP:0006467	Limited shoulder movement	2	1	0.0111108872194444
HP:0009045	Exercise-induced rhabdomyolysis	2	1	0.0111108872194444
HP:0011808	Decreased patellar reflex	2	1	0.0111108872194444
HP:0012664	Reduced ejection fraction	2	1	0.0111108872194444
HP:0012899	Handgrip myotonia	2	1	0.0111108872194444
HP:0030198	Fatigable weakness of distal limb muscles	2	1	0.0111108872194444
HP:0030234	Highly elevated creatine kinase	2	1	0.0111108872194444
HP:0030838	Hip pain	2	1	0.0111108872194444
HP:0003698	Difficulty standing	3	6	0.0150825613397933
HP:0030051	Tip-toe gait	3	6	0.0150825613397933
HP:0030237	Hand muscle weakness	3	6	0.0150825613397933
HP:0000580	Pigmentary retinopathy	4	13	0.0181980137733879
HP:0001618	Dysphonia	4	13	0.0181980137733879
HP:0007210	Lower limb amyotrophy	3	7	0.020578224812456
HP:0000014	Abnormality of the bladder	2	2	0.0213159963423144
HP:0000029	Testicular atrophy	2	2	0.0213159963423144
HP:0001430	Abnormality of the calf musculature	2	2	0.0213159963423144
HP:0001989	Fetal akinesia sequence	2	2	0.0213159963423144
HP:0002127	Abnormal upper motor neuron morphology	2	2	0.0213159963423144
HP:0002401	Stroke-like episode	2	2	0.0213159963423144
HP:0002835	Aspiration	2	2	0.0213159963423144
HP:0004631	Decreased cervical spine flexion due to contractures of posterior cervical muscles	2	2	0.0213159963423144
HP:0007149	Distal upper limb amyotrophy	2	2	0.0213159963423144
HP:0008948	Proximal upper limb amyotrophy	2	2	0.0213159963423144
HP:0009025	Increased connective tissue	2	2	0.0213159963423144
HP:0009058	Increased muscle lipid content	2	2	0.0213159963423144
HP:0011998	Postprandial hyperglycemia	2	2	0.0213159963423144
HP:0030197	Fatigable weakness of skeletal muscles	2	2	0.0213159963423144
HP:0002910	Elevated hepatic transaminase	10	71	0.0263357242512753
HP:0003484	Upper limb muscle weakness	3	8	0.0270274269100396
HP:0100749	Chest pain	5	24	0.030880322770194
HP:0003403	EMG: decremental response of compound muscle action potential to repetitive nerve stimulation	2	3	0.034085881567493
HP:0003731	Quadriceps muscle weakness	2	3	0.034085881567493
HP:0009743	Distichiasis	2	3	0.034085881567493
HP:0011807	Type 1 muscle fiber atrophy	2	3	0.034085881567493
HP:0012722	Heart block	2	3	0.034085881567493
HP:0012785	Flexion contracture of finger	2	3	0.034085881567493
HP:0007141	Sensorimotor neuropathy	5	25	0.0352605961371592
HP:0001276	Hypertonia	7	45	0.0396421327289988
HP:0003199	Decreased muscle mass	3	10	0.0427629824611696
HP:0001324	Muscle weakness	10	79	0.0466648814974459
HP:0000600	Abnormality of the pharynx	2	4	0.0490659392354909
HP:0001621	Weak voice	2	4	0.0490659392354909
HP:0002333	Motor deterioration	2	4	0.0490659392354909
HP:0002578	Gastroparesis	2	4	0.0490659392354909
HP:0008800	Limited hip movement	2	4	0.0490659392354909
HP:0008956	Proximal lower limb amyotrophy	2	4	0.0490659392354909
HP:0010508	Metatarsus valgus	2	4	0.0490659392354909
HP:0010547	Muscle flaccidity	2	4	0.0490659392354909
HP:0031108	Triceps weakness	2	4	0.0490659392354909
HP:0001561	Polyhydramnios	8	58	0.0494562184441201
HP:0002141	Gait imbalance	3	11	0.0520106242573019
HP:0003376	Steppage gait	3	12	0.0621380059883439
HP:0000114	Proximal tubulopathy	1	0	0.0623762376237624
HP:0000205	Pursed lips	1	0	0.0623762376237624
HP:0000775	Abnormality of the diaphragm	1	0	0.0623762376237624
HP:0001583	Rotary nystagmus	1	0	0.0623762376237624
HP:0001604	Vocal cord paresis	1	0	0.0623762376237624
HP:0001709	Third degree atrioventricular block	1	0	0.0623762376237624
HP:0001722	High-output congestive heart failure	1	0	0.0623762376237624
HP:0001730	Progressive hearing impairment	1	0	0.0623762376237624
HP:0001911	Abnormal granulocyte morphology	1	0	0.0623762376237624
HP:0003392	First dorsal interossei muscle weakness	1	0	0.0623762376237624
HP:0003426	First dorsal interossei muscle atrophy	1	0	0.0623762376237624
HP:0003427	Thenar muscle weakness	1	0	0.0623762376237624
HP:0003435	Cold-induced hand cramps	1	0	0.0623762376237624
HP:0003558	Viral infection-induced rhabdomyolysis	1	0	0.0623762376237624
HP:0003697	Scapuloperoneal amyotrophy	1	0	0.0623762376237624
HP:0003713	Muscle fiber necrosis	1	0	0.0623762376237624
HP:0003720	Generalized muscle hypertrophy	1	0	0.0623762376237624
HP:0003733	Thigh hypertrophy	1	0	0.0623762376237624
HP:0004347	Weakness of muscles of respiration	1	0	0.0623762376237624
HP:0004622	Progressive intervertebral space narrowing	1	0	0.0623762376237624
HP:0004875	Neonatal inspiratory stridor	1	0	0.0623762376237624
HP:0004878	Intercostal muscle weakness	1	0	0.0623762376237624
HP:0005072	Hyperextensibility at wrists	1	0	0.0623762376237624
HP:0005144	Ventricular septal hypertrophy	1	0	0.0623762376237624
HP:0005157	Concentric hypertrophic cardiomyopathy	1	0	0.0623762376237624
HP:0005165	Shortened PR interval	1	0	0.0623762376237624
HP:0005745	Congenital foot contractures	1	0	0.0623762376237624
HP:0005853	Congenital foot contraction deformities	1	0	0.0623762376237624
HP:0005934	Imperfect vocal cord adduction	1	0	0.0623762376237624
HP:0006135	Decreased finger mobility	1	0	0.0623762376237624
HP:0006149	Increased laxity of fingers	1	0	0.0623762376237624
HP:0006389	Limited knee flexion	1	0	0.0623762376237624
HP:0006673	Reduced systolic function	1	0	0.0623762376237624
HP:0006682	Ventricular extrasystoles	1	0	0.0623762376237624
HP:0006794	Loss of ability to walk in first decade	1	0	0.0623762376237624
HP:0006899	Fusion of the cerebellar hemispheres	1	0	0.0623762376237624
HP:0007215	Periodic hyperkalemic paralysis	1	0	0.0623762376237624
HP:0007344	Atrophy/Degeneration involving the spinal cord	1	0	0.0623762376237624
HP:0008138	Equinus calcaneus	1	0	0.0623762376237624
HP:0008285	Transient hypophosphatemia	1	0	0.0623762376237624
HP:0008344	Elevated plasma branched chain amino acids	1	0	0.0623762376237624
HP:0008458	Progressive congenital scoliosis	1	0	0.0623762376237624
HP:0008756	Bowing of the vocal cords	1	0	0.0623762376237624
HP:0008946	Pelvic girdle amyotrophy	1	0	0.0623762376237624
HP:0008964	Nonprogressive muscular atrophy	1	0	0.0623762376237624
HP:0008988	Pelvic girdle muscle atrophy	1	0	0.0623762376237624
HP:0009060	Scapular muscle atrophy	1	0	0.0623762376237624
HP:0010872	T-wave inversion	1	0	0.0623762376237624
HP:0010913	Hyperisoleucinemia	1	0	0.0623762376237624
HP:0011042	Abnormal blood potassium concentration	1	0	0.0623762376237624
HP:0011314	Abnormality of long bone morphology	1	0	0.0623762376237624
HP:0011446	Abnormality of higher mental function	1	0	0.0623762376237624
HP:0011785	Thyrotoxicosis with toxic multinodular goitre	1	0	0.0623762376237624
HP:0011786	Thyrotoxicosis with toxic single thyroid nodule	1	0	0.0623762376237624
HP:0011809	Paradoxical myotonia	1	0	0.0623762376237624
HP:0011916	Toe extensor amyotrophy	1	0	0.0623762376237624
HP:0011950	Bronchiolitis	1	0	0.0623762376237624
HP:0011964	Intermittent painful muscle spasms	1	0	0.0623762376237624
HP:0012037	Pectoralis amyotrophy	1	0	0.0623762376237624
HP:0012083	Ubiquitin-positive cerebral inclusion bodies	1	0	0.0623762376237624
HP:0012270	Decreased muscle glycogen content	1	0	0.0623762376237624
HP:0012416	Hypercapnia	1	0	0.0623762376237624
HP:0012496	Reduced maximal inspiratory pressure	1	0	0.0623762376237624
HP:0012696	Abnormal thalamic MRI signal intensity	1	0	0.0623762376237624
HP:0012850	Small intestinal dysmotility	1	0	0.0623762376237624
HP:0012892	Facial muscle hypertrophy	1	0	0.0623762376237624
HP:0012900	Myotonia of the face	1	0	0.0623762376237624
HP:0012901	Myotonia of the jaw	1	0	0.0623762376237624
HP:0012903	Myotonia of the upper limb	1	0	0.0623762376237624
HP:0012904	Cold-sensitive myotonia	1	0	0.0623762376237624
HP:0020062	Decreased hemoglobin concentration	1	0	0.0623762376237624
HP:0025145	Rigors	1	0	0.0623762376237624
HP:0025149	Atrophic muscularis propria	1	0	0.0623762376237624
HP:0030091	Absent muscle fiber merosin	1	0	0.0623762376237624
HP:0030092	Reduced muscle fiber merosin	1	0	0.0623762376237624
HP:0030114	Absent muscle fiber dysferlin	1	0	0.0623762376237624
HP:0030226	Abnormal muscle fiber myotilin	1	0	0.0623762376237624
HP:0030839	Knee pain	1	0	0.0623762376237624
HP:0030951	Skeletal muscle fibrosis	1	0	0.0623762376237624
HP:0031189	Wrist drop	1	0	0.0623762376237624
HP:0031319	Cardiomyocyte hypertrophy	1	0	0.0623762376237624
HP:0031320	Cardiomyocyte mitochondrial proliferation	1	0	0.0623762376237624
HP:0031372	Cold paresis	1	0	0.0623762376237624
HP:0031422	Abnormal morphology of the cerebellar cortex	1	0	0.0623762376237624
HP:0040047	Abnormality of the right hemidiaphragm	1	0	0.0623762376237624
HP:0040173	Abnormality of the tongue muscle	1	0	0.0623762376237624
HP:0040287	Axial muscle atrophy	1	0	0.0623762376237624
HP:0045054	Brachial plexus neuropathy	1	0	0.0623762376237624
HP:0100795	Abnormally straight spine	1	0	0.0623762376237624
HP:0430015	Abnormal morphology of musculature of pharynx	1	0	0.0623762376237624
HP:0430025	Bilateral facial palsy	1	0	0.0623762376237624
HP:3000005	Abnormality of masseter muscle	1	0	0.0623762376237624
HP:0001645	Sudden cardiac death	4	21	0.0658808967543457
HP:0001626	Abnormality of the cardiovascular system	2	5	0.0659352395289463
HP:0001667	Right ventricular hypertrophy	2	5	0.0659352395289463
HP:0002352	Leukoencephalopathy	2	5	0.0659352395289463
HP:0002943	Thoracic scoliosis	2	5	0.0659352395289463
HP:0005162	Left ventricular dysfunction	2	5	0.0659352395289463
HP:0000618	Blindness	5	31	0.069362969953677
HP:0001371	Flexion contracture	4	23	0.0831271267531855
HP:0001611	Nasal speech	4	23	0.0831271267531855
HP:0000829	Hypoparathyroidism	2	6	0.0844037573117218
HP:0000830	Anterior hypopituitarism	2	6	0.0844037573117218
HP:0000883	Thin ribs	2	6	0.0844037573117218
HP:0005109	Abnormality of the Achilles tendon	2	6	0.0844037573117218
HP:0001181	Adducted thumb	3	14	0.0848727062097486
HP:0001388	Joint laxity	4	24	0.0925049996612878
HP:0001635	Congestive heart failure	7	56	0.093391116491445
HP:0002313	Spastic paraparesis	3	15	0.0973887742856705
HP:0002875	Exertional dyspnea	3	15	0.0973887742856705
HP:0006380	Knee flexion contracture	3	15	0.0973887742856705
HP:0000726	Dementia	6	46	0.101017998237083
HP:0002123	Generalized myoclonic seizures	4	25	0.102364947963863
HP:0003477	Peripheral axonal neuropathy	4	25	0.102364947963863
HP:0001012	Multiple lipomas	2	7	0.104209813303701
HP:0001048	Cavernous hemangioma	2	7	0.104209813303701
HP:0002282	Gray matter heterotopia	2	7	0.104209813303701
HP:0002483	Bulbar signs	2	7	0.104209813303701
HP:0005115	Supraventricular arrhythmia	2	7	0.104209813303701
HP:0005216	Impaired mastication	2	7	0.104209813303701
HP:0006829	Severe muscular hypotonia	2	7	0.104209813303701
HP:0000762	Decreased nerve conduction velocity	3	16	0.110604260501449
HP:0002495	Impaired vibratory sensation	3	16	0.110604260501449
HP:0011968	Feeding difficulties	11	107	0.112450236558134
HP:0001260	Dysarthria	15	159	0.118317378599126
HP:0000478	Abnormality of the eye	1	1	0.120890647757198
HP:0000725	Psychotic episodes	1	1	0.120890647757198
HP:0000818	Abnormality of the endocrine system	1	1	0.120890647757198
HP:0001403	Macrovesicular hepatic steatosis	1	1	0.120890647757198
HP:0001437	Abnormality of the musculature of the lower limbs	1	1	0.120890647757198
HP:0001706	Endocardial fibroelastosis	1	1	0.120890647757198
HP:0001716	Wolff-Parkinson-White syndrome	1	1	0.120890647757198
HP:0002270	Abnormality of the autonomic nervous system	1	1	0.120890647757198
HP:0002480	Hepatic encephalopathy	1	1	0.120890647757198
HP:0002791	Hypoventilation	1	1	0.120890647757198
HP:0002877	Nocturnal hypoventilation	1	1	0.120890647757198
HP:0002996	Limited elbow movement	1	1	0.120890647757198
HP:0003133	Abnormality of the spinocerebellar tracts	1	1	0.120890647757198
HP:0003179	Protrusio acetabuli	1	1	0.120890647757198
HP:0003302	Spondylolisthesis	1	1	0.120890647757198
HP:0003387	Decreased number of large peripheral myelinated nerve fibers	1	1	0.120890647757198
HP:0003434	Sensory ataxic neuropathy	1	1	0.120890647757198
HP:0003800	Muscle abnormality related to mitochondrial dysfunction	1	1	0.120890647757198
HP:0004311	Abnormal macrophage morphology	1	1	0.120890647757198
HP:0004389	Intestinal pseudo-obstruction	1	1	0.120890647757198
HP:0004488	Macrocephaly at birth	1	1	0.120890647757198
HP:0004637	Decreased cervical spine mobility	1	1	0.120890647757198
HP:0004673	Decreased facial expression	1	1	0.120890647757198
HP:0004696	Talipes cavus equinovarus	1	1	0.120890647757198
HP:0005946	Ventilator dependence with inability to wean	1	1	0.120890647757198
HP:0006280	Chronic pancreatitis	1	1	0.120890647757198
HP:0006376	Limited elbow flexion	1	1	0.120890647757198
HP:0006555	Diffuse hepatic steatosis	1	1	0.120890647757198
HP:0006698	Dilatation of the ventricular cavity	1	1	0.120890647757198
HP:0007105	Infantile encephalopathy	1	1	0.120890647757198
HP:0007361	Abnormality of the pons	1	1	0.120890647757198
HP:0007740	Long eyelashes in irregular rows	1	1	0.120890647757198
HP:0007970	Congenital ptosis	1	1	0.120890647757198
HP:0008305	Exercise-induced myoglobinuria	1	1	0.120890647757198
HP:0008615	Adult onset sensorineural hearing impairment	1	1	0.120890647757198
HP:0008942	Acute rhabdomyolysis	1	1	0.120890647757198
HP:0009050	Quadriceps muscle atrophy	1	1	0.120890647757198
HP:0009113	Diaphragmatic weakness	1	1	0.120890647757198
HP:0010546	Muscle fibrillation	1	1	0.120890647757198
HP:0010754	Abnormality of the temporomandibular joint	1	1	0.120890647757198
HP:0011123	Inflammatory abnormality of the skin	1	1	0.120890647757198
HP:0011399	Tibialis atrophy	1	1	0.120890647757198
HP:0011706	Second degree atrioventricular block	1	1	0.120890647757198
HP:0012343	Decreased serum ferritin	1	1	0.120890647757198
HP:0012363	Decreased sialylation of O-linked protein glycosylation	1	1	0.120890647757198
HP:0012400	Abnormal aldolase level	1	1	0.120890647757198
HP:0012544	Elevated aldolase level	1	1	0.120890647757198
HP:0012683	Pineal cyst	1	1	0.120890647757198
HP:0012695	Decreased thalamic volume	1	1	0.120890647757198
HP:0012748	Focal T2 hyperintense brainstem lesion	1	1	0.120890647757198
HP:0012764	Orthopnea	1	1	0.120890647757198
HP:0012817	Noncompaction cardiomyopathy	1	1	0.120890647757198
HP:0025191	Segmental myoclonic seizures	1	1	0.120890647757198
HP:0025313	Exophoria	1	1	0.120890647757198
HP:0025406	Asthenia	1	1	0.120890647757198
HP:0030089	Abnormal muscle fiber protein expression	1	1	0.120890647757198
HP:0030230	Central core regions in muscle fibers	1	1	0.120890647757198
HP:0030781	Increased circulating free fatty acid level	1	1	0.120890647757198
HP:0030878	Abnormality on pulmonary function testing	1	1	0.120890647757198
HP:0031139	Frog-leg posture	1	1	0.120890647757198
HP:0040013	Decreased mitochondrial number	1	1	0.120890647757198
HP:0040014	Increased mitochondrial number	1	1	0.120890647757198
HP:0040266	Proximal upper limb muscle hypertrophy	1	1	0.120890647757198
HP:0100293	Muscle fiber hypertrophy	1	1	0.120890647757198
HP:0100299	Muscle fiber inclusion bodies	1	1	0.120890647757198
HP:0100301	Muscle fiber tubular inclusions	1	1	0.120890647757198
HP:0100647	Graves disease	1	1	0.120890647757198
HP:0100813	Testicular torsion	1	1	0.120890647757198
HP:0002445	Tetraplegia	2	8	0.125117710426513
HP:0002922	Increased CSF protein	2	8	0.125117710426513
HP:0012762	Cerebral white matter atrophy	2	8	0.125117710426513
HP:0002151	Increased serum lactate	4	28	0.134646331466778
HP:0002312	Clumsiness	4	28	0.134646331466778
HP:0001302	Pachygyria	3	18	0.138921926151301
HP:0002098	Respiratory distress	6	51	0.140454800427654
HP:0001252	Muscular hypotonia	20	231	0.142461577376021
HP:0000158	Macroglossia	4	29	0.146236214480096
HP:0001874	Abnormality of neutrophils	2	9	0.146915551207951
HP:0003418	Back pain	2	9	0.146915551207951
HP:0007108	Demyelinating peripheral neuropathy	2	9	0.146915551207951
HP:0007359	Focal-onset seizure	2	9	0.146915551207951
HP:0100750	Atelectasis	2	9	0.146915551207951
HP:0001256	Intellectual disability, mild	9	89	0.152771863294082
HP:0002381	Aphasia	3	19	0.153915799087241
HP:0001254	Lethargy	5	42	0.165386700608879
HP:0002518	Abnormality of the periventricular white matter	2	10	0.169413223114528
HP:0003390	Sensory axonal neuropathy	2	10	0.169413223114528
HP:0100613	Death in early adulthood	2	10	0.169413223114528
HP:0000523	Subcapsular cataract	1	2	0.175780528026074
HP:0001238	Slender finger	1	2	0.175780528026074
HP:0001293	Cranial nerve compression	1	2	0.175780528026074
HP:0001557	Prenatal movement abnormality	1	2	0.175780528026074
HP:0001662	Bradycardia	1	2	0.175780528026074
HP:0001969	Tubulointerstitial abnormality	1	2	0.175780528026074
HP:0002361	Psychomotor deterioration	1	2	0.175780528026074
HP:0002493	Upper motor neuron dysfunction	1	2	0.175780528026074
HP:0002795	Functional respiratory abnormality	1	2	0.175780528026074
HP:0003393	Thenar muscle atrophy	1	2	0.175780528026074
HP:0003448	Decreased sensory nerve conduction velocity	1	2	0.175780528026074
HP:0003482	EMG: axonal abnormality	1	2	0.175780528026074
HP:0003554	Type 2 muscle fiber atrophy	1	2	0.175780528026074
HP:0003724	Shoulder girdle muscle atrophy	1	2	0.175780528026074
HP:0003789	Minicore myopathy	1	2	0.175780528026074
HP:0004490	Calvarial hyperostosis	1	2	0.175780528026074
HP:0004755	Supraventricular tachycardia	1	2	0.175780528026074
HP:0005155	Ventricular escape rhythm	1	2	0.175780528026074
HP:0005781	Contractures of the large joints	1	2	0.175780528026074
HP:0005879	Congenital finger flexion contractures	1	2	0.175780528026074
HP:0006251	Limited wrist extension	1	2	0.175780528026074
HP:0006879	Pontocerebellar atrophy	1	2	0.175780528026074
HP:0006913	Frontal cortical atrophy	1	2	0.175780528026074
HP:0007009	Central nervous system degeneration	1	2	0.175780528026074
HP:0007015	Poor gross motor coordination	1	2	0.175780528026074
HP:0007179	Absent smooth pursuit	1	2	0.175780528026074
HP:0007260	Type II lissencephaly	1	2	0.175780528026074
HP:0007269	Spinal muscular atrophy	1	2	0.175780528026074
HP:0008322	Abnormal mitochondrial morphology	1	2	0.175780528026074
HP:0009049	Peroneal muscle atrophy	1	2	0.175780528026074
HP:0009051	Increased muscle glycogen content	1	2	0.175780528026074
HP:0009130	Hand muscle atrophy	1	2	0.175780528026074
HP:0010781	Skin dimple	1	2	0.175780528026074
HP:0011703	Sinus tachycardia	1	2	0.175780528026074
HP:0011705	First degree atrioventricular block	1	2	0.175780528026074
HP:0012036	Sternocleidomastoid amyotrophy	1	2	0.175780528026074
HP:0012251	ST segment elevation	1	2	0.175780528026074
HP:0012364	Decreased urinary potassium	1	2	0.175780528026074
HP:0012402	Increased urine alpha-ketoglutarate concentration	1	2	0.175780528026074
HP:0012768	Neonatal asphyxia	1	2	0.175780528026074
HP:0025116	Fetal distress	1	2	0.175780528026074
HP:0025461	Abnormal cell morphology	1	2	0.175780528026074
HP:0030117	Absent muscle fiber emerin	1	2	0.175780528026074
HP:0031258	Delirium	1	2	0.175780528026074
HP:0031546	Cardiac conduction abnormality	1	2	0.175780528026074
HP:0100612	Odontogenic neoplasm	1	2	0.175780528026074
HP:0100639	Erectile abnormalities	1	2	0.175780528026074
HP:0200101	Decreased/absent ankle reflexes	1	2	0.175780528026074
HP:0000473	Torticollis	3	21	0.18530159051971
HP:0000543	Optic disc pallor	2	11	0.192440539596957
HP:0000689	Dental malocclusion	2	11	0.192440539596957
HP:0001533	Slender build	2	11	0.192440539596957
HP:0002090	Pneumonia	2	11	0.192440539596957
HP:0002155	Hypertriglyceridemia	4	33	0.196110809411677
HP:0000218	High palate	11	122	0.202017990296001
HP:0007256	Abnormal pyramidal sign	5	46	0.209176866125454
HP:0011675	Arrhythmia	5	46	0.209176866125454
HP:0001985	Hypoketotic hypoglycemia	2	12	0.215845525486899
HP:0002936	Distal sensory impairment	2	12	0.215845525486899
HP:0025435	Increased lactate dehydrogenase activity	2	12	0.215845525486899
HP:0001639	Hypertrophic cardiomyopathy	5	47	0.22068312866677
HP:0001763	Pes planus	6	60	0.226082873520529
HP:0000211	Trismus	1	3	0.227268705253994
HP:0000329	Facial hemangioma	1	3	0.227268705253994
HP:0001413	Micronodular cirrhosis	1	3	0.227268705253994
HP:0001460	Aplasia/Hypoplasia involving the skeletal musculature	1	3	0.227268705253994
HP:0001714	Ventricular hypertrophy	1	3	0.227268705253994
HP:0002549	Deficit in phonologic short-term memory	1	3	0.227268705253994
HP:0002648	Abnormality of calvarial morphology	1	3	0.227268705253994
HP:0002876	Episodic tachypnea	1	3	0.227268705253994
HP:0002904	Hyperbilirubinemia	1	3	0.227268705253994
HP:0003075	Hypoproteinemia	1	3	0.227268705253994
HP:0003115	Abnormal EKG	1	3	0.227268705253994
HP:0003287	Abnormality of mitochondrial metabolism	1	3	0.227268705253994
HP:0003542	Increased serum pyruvate	1	3	0.227268705253994
HP:0003642	Type I transferrin isoform profile	1	3	0.227268705253994
HP:0004299	Hernia of the abdominal wall	1	3	0.227268705253994
HP:0005830	Flexion contracture of toe	1	3	0.227268705253994
HP:0006846	Acute encephalopathy	1	3	0.227268705253994
HP:0006858	Impaired distal proprioception	1	3	0.227268705253994
HP:0007067	Distal peripheral sensory neuropathy	1	3	0.227268705253994
HP:0007110	Central hypoventilation	1	3	0.227268705253994
HP:0007227	Macrogyria	1	3	0.227268705253994
HP:0007502	Follicular hyperkeratosis	1	3	0.227268705253994
HP:0007514	Edema of the dorsum of hands	1	3	0.227268705253994
HP:0007731	Chorioretinal dysplasia	1	3	0.227268705253994
HP:0008002	Abnormality of macular pigmentation	1	3	0.227268705253994
HP:0008056	Aplasia/Hypoplasia affecting the eye	1	3	0.227268705253994
HP:0008167	Very long chain fatty acid accumulation	1	3	0.227268705253994
HP:0008443	Spinal deformities	1	3	0.227268705253994
HP:0008610	Infantile sensorineural hearing impairment	1	3	0.227268705253994
HP:0008625	Severe sensorineural hearing impairment	1	3	0.227268705253994
HP:0009023	Abdominal wall muscle weakness	1	3	0.227268705253994
HP:0009072	Decreased Achilles reflex	1	3	0.227268705253994
HP:0010935	Abnormality of the upper urinary tract	1	3	0.227268705253994
HP:0011169	Generalized clonic seizures	1	3	0.227268705253994
HP:0012084	Abnormality of skeletal muscle fiber size	1	3	0.227268705253994
HP:0012391	Hyporeflexia of upper limbs	1	3	0.227268705253994
HP:0012432	Chronic fatigue	1	3	0.227268705253994
HP:0012472	Eclabion	1	3	0.227268705253994
HP:0025331	Upgaze palsy	1	3	0.227268705253994
HP:0040196	Mild microcephaly	1	3	0.227268705253994
HP:0045040	Abnormal lactate dehydrogenase activity	1	3	0.227268705253994
HP:0001397	Hepatic steatosis	4	36	0.236498440892346
HP:0000556	Retinal dystrophy	2	13	0.239492836178985
HP:0001285	Spastic tetraparesis	2	13	0.239492836178985
HP:0001657	Prolonged QT interval	2	13	0.239492836178985
HP:0001962	Palpitations	2	13	0.239492836178985
HP:0002033	Poor suck	2	13	0.239492836178985
HP:0002527	Falls	2	13	0.239492836178985
HP:0002901	Hypocalcemia	2	13	0.239492836178985
HP:0000276	Long face	5	49	0.244257164142071
HP:0001531	Failure to thrive in infancy	3	25	0.25218806485421
HP:0000649	Abnormality of visual evoked potentials	2	14	0.263262300773826
HP:0000912	Sprengel anomaly	2	14	0.263262300773826
HP:0002169	Clonus	2	14	0.263262300773826
HP:0002500	Abnormality of the cerebral white matter	2	14	0.263262300773826
HP:0100543	Cognitive impairment	7	77	0.266999621455444
HP:0000385	Small earlobe	1	4	0.27556441117562
HP:0000525	Abnormality iris morphology	1	4	0.27556441117562
HP:0000589	Coloboma	1	4	0.27556441117562
HP:0001155	Abnormality of the hand	1	4	0.27556441117562
HP:0001751	Vestibular dysfunction	1	4	0.27556441117562
HP:0001812	Hyperconvex fingernails	1	4	0.27556441117562
HP:0001976	Reduced antithrombin III activity	1	4	0.27556441117562
HP:0002068	Neuromuscular dysphagia	1	4	0.27556441117562
HP:0002085	Occipital encephalocele	1	4	0.27556441117562
HP:0002198	Dilated fourth ventricle	1	4	0.27556441117562
HP:0002403	Positive Romberg sign	1	4	0.27556441117562
HP:0002442	Dyscalculia	1	4	0.27556441117562
HP:0002476	Primitive reflex	1	4	0.27556441117562
HP:0002783	Recurrent lower respiratory tract infections	1	4	0.27556441117562
HP:0003119	Abnormal circulating lipid concentration	1	4	0.27556441117562
HP:0003348	Hyperalaninemia	1	4	0.27556441117562
HP:0004325	Decreased body weight	1	4	0.27556441117562
HP:0005659	Thoracic kyphoscoliosis	1	4	0.27556441117562
HP:0006543	Cardiorespiratory arrest	1	4	0.27556441117562
HP:0006955	Olivopontocerebellar hypoplasia	1	4	0.27556441117562
HP:0007204	Diffuse white matter abnormalities	1	4	0.27556441117562
HP:0007272	Progressive psychomotor deterioration	1	4	0.27556441117562
HP:0007479	Congenital nonbullous ichthyosiform erythroderma	1	4	0.27556441117562
HP:0008110	Equinovarus deformity	1	4	0.27556441117562
HP:0008256	Adrenocortical adenoma	1	4	0.27556441117562
HP:0010851	EEG with burst suppression	1	4	0.27556441117562
HP:0012103	Abnormality of the mitochondrion	1	4	0.27556441117562
HP:0012747	Abnormal brainstem MRI signal intensity	1	4	0.27556441117562
HP:0025502	Overweight	1	4	0.27556441117562
HP:0030872	Abnormal cardiac ventricular function	1	4	0.27556441117562
HP:0002013	Vomiting	5	52	0.280783398833044
HP:0000193	Bifid uvula	3	27	0.286896086813837
HP:0000643	Blepharospasm	2	15	0.287047580049036
HP:0001374	Congenital hip dislocation	2	15	0.287047580049036
HP:0001942	Metabolic acidosis	2	15	0.287047580049036
HP:0003438	Absent Achilles reflex	2	15	0.287047580049036
HP:0001761	Pes cavus	6	66	0.290789955841829
HP:0002827	Hip dislocation	4	41	0.307443547753752
HP:0000496	Abnormality of eye movement	2	16	0.310754930769457
HP:0001608	Abnormality of the voice	2	16	0.310754930769457
HP:0002300	Mutism	2	16	0.310754930769457
HP:0008944	Distal lower limb amyotrophy	2	16	0.310754930769457
HP:0009125	Lipodystrophy	2	16	0.310754930769457
HP:0100022	Abnormality of movement	2	16	0.310754930769457
HP:0100651	Type I diabetes mellitus	2	16	0.310754930769457
HP:0001251	Ataxia	13	165	0.314137995713734
HP:0000408	Progressive sensorineural hearing impairment	1	5	0.320864105563645
HP:0001082	Cholecystitis	1	5	0.320864105563645
HP:0001138	Optic neuropathy	1	5	0.320864105563645
HP:0001765	Hammertoe	1	5	0.320864105563645
HP:0002181	Cerebral edema	1	5	0.320864105563645
HP:0002406	Limb dysmetria	1	5	0.320864105563645
HP:0002425	Anarthria	1	5	0.320864105563645
HP:0002446	Astrocytosis	1	5	0.320864105563645
HP:0002505	Progressive inability to walk	1	5	0.320864105563645
HP:0002600	Hyporeflexia of lower limbs	1	5	0.320864105563645
HP:0002917	Hypomagnesemia	1	5	0.320864105563645
HP:0003431	Decreased motor nerve conduction velocity	1	5	0.320864105563645
HP:0004887	Respiratory failure requiring assisted ventilation	1	5	0.320864105563645
HP:0006889	Intellectual disability, borderline	1	5	0.320864105563645
HP:0007334	Generalized tonic-clonic seizures with focal onset	1	5	0.320864105563645
HP:0007704	Paroxysmal involuntary eye movements	1	5	0.320864105563645
HP:0008207	Primary adrenal insufficiency	1	5	0.320864105563645
HP:0011923	Decreased activity of mitochondrial complex I	1	5	0.320864105563645
HP:0100569	Abnormally ossified vertebrae	1	5	0.320864105563645
HP:0100724	Hypercoagulability	1	5	0.320864105563645
HP:0000565	Esotropia	2	17	0.334302068448046
HP:0002092	Pulmonary arterial hypertension	3	30	0.339542271405475
HP:0002751	Kyphoscoliosis	3	30	0.339542271405475
HP:0002076	Migraine	4	44	0.351115079526386
HP:0002650	Scoliosis	20	271	0.353118217931101
HP:0002136	Broad-based gait	2	18	0.357617121228087
HP:0000817	Poor eye contact	1	6	0.363352249902762
HP:0001103	Abnormal macular morphology	1	6	0.363352249902762
HP:0002145	Frontotemporal dementia	1	6	0.363352249902762
HP:0002191	Progressive spasticity	1	6	0.363352249902762
HP:0002756	Pathologic fracture	1	6	0.363352249902762
HP:0003256	Abnormality of the coagulation cascade	1	6	0.363352249902762
HP:0003445	EMG: neuropathic changes	1	6	0.363352249902762
HP:0005110	Atrial fibrillation	1	6	0.363352249902762
HP:0005268	Spontaneous abortion	1	6	0.363352249902762
HP:0007973	Retinal dysplasia	1	6	0.363352249902762
HP:0009129	Upper limb amyotrophy	1	6	0.363352249902762
HP:0010794	Impaired visuospatial constructive cognition	1	6	0.363352249902762
HP:0012086	Abnormal urinary color	1	6	0.363352249902762
HP:0012246	Oculomotor nerve palsy	1	6	0.363352249902762
HP:0012377	Hemianopia	1	6	0.363352249902762
HP:0012758	Neurodevelopmental delay	1	6	0.363352249902762
HP:0100515	Pollakisuria	1	6	0.363352249902762
HP:0100614	Myositis	1	6	0.363352249902762
HP:0100646	Thyroiditis	1	6	0.363352249902762
HP:0002069	Generalized tonic-clonic seizures	4	45	0.365720482956725
HP:0001762	Talipes equinovarus	5	59	0.36925191672011
HP:0002194	Delayed gross motor development	3	32	0.374582338497142
HP:0001321	Cerebellar hypoplasia	4	46	0.380315415524525
HP:0002607	Bowel incontinence	2	19	0.380637668078275
HP:0008872	Feeding difficulties in infancy	5	60	0.382040123393258
HP:0001943	Hypoglycemia	3	33	0.391983926550295
HP:0004374	Hemiplegia/hemiparesis	3	33	0.391983926550295
HP:0000016	Urinary retention	1	7	0.403202034558625
HP:0000069	Abnormality of the ureter	1	7	0.403202034558625
HP:0000253	Progressive microcephaly	1	7	0.403202034558625
HP:0000485	Megalocornea	1	7	0.403202034558625
HP:0000836	Hyperthyroidism	1	7	0.403202034558625
HP:0001919	Acute kidney injury	1	7	0.403202034558625
HP:0002280	Enlarged cisterna magna	1	7	0.403202034558625
HP:0002365	Hypoplasia of the brainstem	1	7	0.403202034558625
HP:0002435	Meningocele	1	7	0.403202034558625
HP:0002474	Expressive language delay	1	7	0.403202034558625
HP:0002647	Aortic dissection	1	7	0.403202034558625
HP:0002870	Obstructive sleep apnea	1	7	0.403202034558625
HP:0003234	Decreased plasma carnitine	1	7	0.403202034558625
HP:0003241	External genital hypoplasia	1	7	0.403202034558625
HP:0003473	Fatigable weakness	1	7	0.403202034558625
HP:0006887	Intellectual disability, progressive	1	7	0.403202034558625
HP:0007083	Hyperactive patellar reflex	1	7	0.403202034558625
HP:0007178	Motor polyneuropathy	1	7	0.403202034558625
HP:0010808	Protruding tongue	1	7	0.403202034558625
HP:0011819	Submucous cleft soft palate	1	7	0.403202034558625
HP:0012534	Dysesthesia	1	7	0.403202034558625
HP:0100626	Chronic hepatic failure	1	7	0.403202034558625
HP:0000294	Low anterior hairline	2	20	0.403309854977379
HP:0000763	Sensory neuropathy	2	20	0.403309854977379
HP:0001987	Hyperammonemia	2	20	0.403309854977379
HP:0002464	Spastic dysarthria	2	20	0.403309854977379
HP:0002064	Spastic gait	3	34	0.409266848650761
HP:0000716	Depressivity	6	77	0.416478785699822
HP:0000774	Narrow chest	4	50	0.438214231289591
HP:0000297	Facial hypotonia	1	8	0.44057606221549
HP:0000765	Abnormality of the thorax	1	8	0.44057606221549
HP:0001655	Patent foramen ovale	1	8	0.44057606221549
HP:0001923	Reticulocytosis	1	8	0.44057606221549
HP:0002344	Progressive neurologic deterioration	1	8	0.44057606221549
HP:0002410	Aqueductal stenosis	1	8	0.44057606221549
HP:0002816	Genu recurvatum	1	8	0.44057606221549
HP:0003141	Increased LDL cholesterol concentration	1	8	0.44057606221549
HP:0004372	Reduced consciousness/confusion	1	8	0.44057606221549
HP:0006895	Lower limb hypertonia	1	8	0.44057606221549
HP:0010511	Long toe	1	8	0.44057606221549
HP:0100576	Amaurosis fugax	1	8	0.44057606221549
HP:0200134	Epileptic encephalopathy	1	8	0.44057606221549
HP:0002317	Unsteady gait	3	36	0.443370817644057
HP:0000657	Oculomotor apraxia	2	22	0.447431764371252
HP:0002104	Apnea	2	22	0.447431764371252
HP:0005978	Type II diabetes mellitus	2	22	0.447431764371252
HP:0003401	Paresthesia	3	37	0.460144253596899
HP:0001337	Tremor	6	81	0.462256945331041
HP:0000518	Cataract	12	170	0.465704832242239
HP:0000262	Turricephaly	1	9	0.475626990192043
HP:0001605	Vocal cord paralysis	1	9	0.475626990192043
HP:0001698	Pericardial effusion	1	9	0.475626990192043
HP:0002002	Deep philtrum	1	9	0.475626990192043
HP:0002197	Generalized-onset seizure	1	9	0.475626990192043
HP:0002362	Shuffling gait	1	9	0.475626990192043
HP:0002371	Loss of speech	1	9	0.475626990192043
HP:0002905	Hyperphosphatemia	1	9	0.475626990192043
HP:0003155	Elevated alkaline phosphatase	1	9	0.475626990192043
HP:0003444	EMG: chronic denervation signs	1	9	0.475626990192043
HP:0007420	Spontaneous hematomas	1	9	0.475626990192043
HP:0009062	Infantile axial hypotonia	1	9	0.475626990192043
HP:0011343	Moderate global developmental delay	1	9	0.475626990192043
HP:0011362	Abnormal hair quantity	1	9	0.475626990192043
HP:0002808	Kyphosis	7	97	0.475730571355022
HP:0000767	Pectus excavatum	5	68	0.483128490348595
HP:0001522	Death in infancy	3	39	0.493030305153508
HP:0000519	Developmental cataract	1	10	0.508498134090453
HP:0000853	Goiter	1	10	0.508498134090453
HP:0001545	Anteriorly placed anus	1	10	0.508498134090453
HP:0001878	Hemolytic anemia	1	10	0.508498134090453
HP:0002045	Hypothermia	1	10	0.508498134090453
HP:0002490	Increased CSF lactate	1	10	0.508498134090453
HP:0002510	Spastic tetraplegia	1	10	0.508498134090453
HP:0002839	Urinary bladder sphincter dysfunction	1	10	0.508498134090453
HP:0004396	Poor appetite	1	10	0.508498134090453
HP:0005180	Tricuspid regurgitation	1	10	0.508498134090453
HP:0008969	Leg muscle stiffness	1	10	0.508498134090453
HP:0012444	Brain atrophy	1	10	0.508498134090453
HP:0040288	Nasogastric tube feeding	1	10	0.508498134090453
HP:0100807	Long fingers	1	10	0.508498134090453
HP:0000194	Open mouth	2	25	0.510063337474232
HP:0002126	Polymicrogyria	2	25	0.510063337474232
HP:0000821	Hypothyroidism	4	56	0.521850354999783
HP:0000275	Narrow face	2	26	0.529899896906541
HP:0001622	Premature birth	2	26	0.529899896906541
HP:0002089	Pulmonary hypoplasia	2	26	0.529899896906541
HP:0002353	EEG abnormality	4	57	0.535243664735052
HP:0000534	Abnormal eyebrow morphology	1	11	0.539324035088264
HP:0001396	Cholestasis	1	11	0.539324035088264
HP:0001620	High pitched voice	1	11	0.539324035088264
HP:0002150	Hypercalciuria	1	11	0.539324035088264
HP:0002463	Language impairment	1	11	0.539324035088264
HP:0002616	Aortic root aneurysm	1	11	0.539324035088264
HP:0002643	Neonatal respiratory distress	1	11	0.539324035088264
HP:0002789	Tachypnea	1	11	0.539324035088264
HP:0008046	Abnormal retinal vascular morphology	1	11	0.539324035088264
HP:0009623	Proximal placement of thumb	1	11	0.539324035088264
HP:0012531	Pain	1	11	0.539324035088264
HP:0200037	Skin vesicle	1	11	0.539324035088264
HP:0000738	Hallucinations	2	27	0.549190604264631
HP:0001258	Spastic paraplegia	2	27	0.549190604264631
HP:0001634	Mitral valve prolapse	2	27	0.549190604264631
HP:0007703	Abnormality of retinal pigmentation	3	43	0.55569746832719
HP:0000396	Overfolded helix	1	12	0.568230993045873
HP:0000873	Diabetes insipidus	1	12	0.568230993045873
HP:0001279	Syncope	1	12	0.568230993045873
HP:0001520	Large for gestational age	1	12	0.568230993045873
HP:0002269	Abnormality of neuronal migration	1	12	0.568230993045873
HP:0002346	Head tremor	1	12	0.568230993045873
HP:0002902	Hyponatremia	1	12	0.568230993045873
HP:0004942	Aortic aneurysm	1	12	0.568230993045873
HP:0007350	Hyperreflexia in upper limbs	1	12	0.568230993045873
HP:0012385	Camptodactyly	1	12	0.568230993045873
HP:0100335	Non-midline cleft lip	1	12	0.568230993045873
HP:0002094	Dyspnea	2	29	0.586099611974338
HP:0000144	Decreased fertility	1	13	0.595337567473486
HP:0000243	Trigonocephaly	1	13	0.595337567473486
HP:0000528	Anophthalmia	1	13	0.595337567473486
HP:0000551	Color vision defect	1	13	0.595337567473486
HP:0001654	Abnormal heart valve morphology	1	13	0.595337567473486
HP:0002149	Hyperuricemia	1	13	0.595337567473486
HP:0002204	Pulmonary embolism	1	13	0.595337567473486
HP:0002415	Leukodystrophy	1	13	0.595337567473486
HP:0006554	Acute hepatic failure	1	13	0.595337567473486
HP:0007002	Motor axonal neuropathy	1	13	0.595337567473486
HP:0100540	Palpebral edema	1	13	0.595337567473486
HP:0000054	Micropenis	2	31	0.620751290741252
HP:0000499	Abnormal eyelash morphology	1	14	0.620755048280236
HP:0001348	Brisk reflexes	1	14	0.620755048280236
HP:0001360	Holoprosencephaly	1	14	0.620755048280236
HP:0001804	Hypoplastic fingernail	1	14	0.620755048280236
HP:0002099	Asthma	1	14	0.620755048280236
HP:0002206	Pulmonary fibrosis	1	14	0.620755048280236
HP:0002637	Cerebral ischemia	1	14	0.620755048280236
HP:0004334	Dermal atrophy	1	14	0.620755048280236
HP:0007663	Reduced visual acuity	1	14	0.620755048280236
HP:0100753	Schizophrenia	1	14	0.620755048280236
HP:0003487	Babinski sign	6	96	0.622461838040722
HP:0001336	Myoclonus	4	65	0.635111859340047
HP:0000815	Hypergonadotropic hypogonadism	1	15	0.644587898113997
HP:0001083	Ectopia lentis	1	15	0.644587898113997
HP:0001331	Absent septum pellucidum	1	15	0.644587898113997
HP:0001640	Cardiomegaly	1	15	0.644587898113997
HP:0002018	Nausea	1	15	0.644587898113997
HP:0002645	Wormian bones	1	15	0.644587898113997
HP:0005214	Intestinal obstruction	1	15	0.644587898113997
HP:0010535	Sleep apnea	1	15	0.644587898113997
HP:0011069	Increased number of teeth	1	15	0.644587898113997
HP:0012332	Abnormal autonomic nervous system physiology	1	15	0.644587898113997
HP:0000482	Microcornea	2	33	0.653148082735119
HP:0007360	Aplasia/Hypoplasia of the cerebellum	2	33	0.653148082735119
HP:0000411	Protruding ear	3	50	0.653605277251667
HP:0001347	Hyperreflexia	7	116	0.659000233773466
HP:0008947	Infantile muscular hypotonia	3	51	0.666275338778848
HP:0001171	Split hand	1	16	0.666934167993057
HP:0001350	Slurred speech	1	16	0.666934167993057
HP:0002187	Intellectual disability, profound	1	16	0.666934167993057
HP:0002900	Hypokalemia	1	16	0.666934167993057
HP:0003474	Sensory impairment	1	16	0.666934167993057
HP:0006801	Hyperactive deep tendon reflexes	1	16	0.666934167993057
HP:0100021	Cerebral palsy	1	16	0.666934167993057
HP:0000771	Gynecomastia	2	34	0.668510680157756
HP:0000407	Sensorineural hearing impairment	9	151	0.68141946398414
HP:0000541	Retinal detachment	2	35	0.683324613386727
HP:0001259	Coma	2	35	0.683324613386727
HP:0000174	Abnormal palate morphology	1	17	0.68788588782974
HP:0000341	Narrow forehead	1	17	0.68788588782974
HP:0000474	Thickened nuchal skin fold	1	17	0.68788588782974
HP:0000609	Optic nerve hypoplasia	1	17	0.68788588782974
HP:0000656	Ectropion	1	17	0.68788588782974
HP:0001289	Confusion	1	17	0.68788588782974
HP:0010529	Echolalia	1	17	0.68788588782974
HP:0010978	Abnormality of immune system physiology	1	17	0.68788588782974
HP:0011001	Increased bone mineral density	1	17	0.68788588782974
HP:0002072	Chorea	2	36	0.697597975426402
HP:0001387	Joint stiffness	5	88	0.701706013326305
HP:0006532	Recurrent pneumonia	1	18	0.707529433350945
HP:0007730	Iris hypopigmentation	1	18	0.707529433350945
HP:0000020	Urinary incontinence	2	37	0.711339983955178
HP:0000176	Submucous cleft hard palate	1	19	0.725945870831095
HP:0000601	Hypotelorism	1	19	0.725945870831095
HP:0000662	Nyctalopia	1	19	0.725945870831095
HP:0006610	Wide intermamillary distance	1	19	0.725945870831095
HP:0008619	Bilateral sensorineural hearing impairment	1	19	0.725945870831095
HP:0010804	Tented upper lip vermilion	1	19	0.725945870831095
HP:0001376	Limitation of joint mobility	3	57	0.7352722011878
HP:0001072	Thickened skin	1	20	0.743211280968736
HP:0001320	Cerebellar vermis hypoplasia	1	20	0.743211280968736
HP:0001653	Mitral regurgitation	1	20	0.743211280968736
HP:0001733	Pancreatitis	1	20	0.743211280968736
HP:0002121	Absence seizure	1	20	0.743211280968736
HP:0002174	Postural tremor	1	20	0.743211280968736
HP:0002673	Coxa valga	1	20	0.743211280968736
HP:0000545	Myopia	5	93	0.745217021523241
HP:0001344	Absent speech	2	40	0.749483490759578
HP:0001385	Hip dysplasia	2	40	0.749483490759578
HP:0002465	Poor speech	2	40	0.749483490759578
HP:0000160	Narrow mouth	3	59	0.755643894948605
HP:0001601	Laryngomalacia	1	21	0.759397063158801
HP:0001609	Hoarse voice	1	21	0.759397063158801
HP:0002021	Pyloric stenosis	1	21	0.759397063158801
HP:0002075	Dysdiadochokinesis	1	21	0.759397063158801
HP:0002812	Coxa vara	1	21	0.759397063158801
HP:0001328	Specific learning disability	3	60	0.765352684849011
HP:0000486	Strabismus	12	213	0.766059889979264
HP:0002354	Memory impairment	2	42	0.772461054119334
HP:0000358	Posteriorly rotated ears	1	22	0.774570221337975
HP:0001266	Choreoathetosis	1	22	0.774570221337975
HP:0001298	Encephalopathy	1	22	0.774570221337975
HP:0001518	Small for gestational age	1	22	0.774570221337975
HP:0100820	Glomerulopathy	1	22	0.774570221337975
HP:0000470	Short neck	5	97	0.776574052582704
HP:0000293	Full cheeks	2	43	0.783252107920821
HP:0000768	Pectus carinatum	2	43	0.783252107920821
HP:0000252	Microcephaly	14	250	0.788085697946446
HP:0012735	Cough	1	23	0.788793632510442
HP:0002376	Developmental regression	4	81	0.78997970329016
HP:0000268	Dolichocephaly	2	44	0.793595500629622
HP:0000737	Irritability	2	44	0.793595500629622
HP:0000098	Tall stature	1	24	0.802126298995254
HP:0002357	Dysphasia	1	24	0.802126298995254
HP:0002970	Genu varum	1	24	0.802126298995254
HP:0000819	Diabetes mellitus	2	45	0.80350457098332
HP:0002230	Generalized hirsutism	2	45	0.80350457098332
HP:0000750	Delayed speech and language development	5	101	0.804931706524026
HP:0002240	Hepatomegaly	8	154	0.808940628189608
HP:0001274	Agenesis of corpus callosum	3	65	0.809323562262133
HP:0001513	Obesity	3	65	0.809323562262133
HP:0000238	Hydrocephalus	4	84	0.812313007318954
HP:0000100	Nephrotic syndrome	1	25	0.814623585374501
HP:0001883	Talipes	1	25	0.814623585374501
HP:0003042	Elbow dislocation	1	25	0.814623585374501
HP:0100578	Lipoatrophy	1	25	0.814623585374501
HP:0000501	Glaucoma	3	66	0.817242276031319
HP:0000648	Optic atrophy	8	156	0.819734684186141
HP:0008064	Ichthyosis	2	47	0.822073486818602
HP:0002395	Lower limb hyperreflexia	1	26	0.826337441062972
HP:0007598	Bilateral single transverse palmar creases	1	26	0.826337441062972
HP:0002857	Genu valgum	2	48	0.830760216629522
HP:0002078	Truncal ataxia	1	27	0.837316609365063
HP:0000739	Anxiety	3	69	0.839357375392172
HP:0000083	Renal insufficiency	3	70	0.846203542305245
HP:0001305	Dandy-Walker malformation	1	28	0.847606823832935
HP:0012368	Flat face	1	28	0.847606823832935
HP:0000239	Large fontanelles	1	29	0.857250992691323
HP:0002020	Gastroesophageal reflux	3	73	0.86525756243666
HP:0002027	Abdominal pain	3	73	0.86525756243666
HP:0000776	Congenital diaphragmatic hernia	1	30	0.866289372048556
HP:0000787	Nephrolithiasis	1	30	0.866289372048556
HP:0002039	Anorexia	1	30	0.866289372048556
HP:0002797	Osteolysis	1	30	0.866289372048556
HP:0008736	Hypoplasia of penis	2	53	0.868746137527951
HP:0000044	Hypogonadotrophic hypogonadism	1	31	0.874759728570367
HP:0000581	Blepharophimosis	1	31	0.874759728570367
HP:0001394	Cirrhosis	1	31	0.874759728570367
HP:0001399	Hepatic failure	1	31	0.874759728570367
HP:0000343	Long philtrum	4	97	0.887848421568537
HP:0000772	Abnormality of the ribs	1	33	0.890135899890263
HP:0001300	Parkinsonism	1	33	0.890135899890263
HP:0002714	Downturned corners of mouth	1	33	0.890135899890263
HP:0002167	Neurological speech impairment	2	57	0.89335927031981
HP:0003270	Abdominal distention	1	34	0.89710612980659
HP:0009830	Peripheral neuropathy	2	58	0.898810548565741
HP:0001053	Hypopigmented skin patches	1	35	0.903637428367986
HP:0002119	Ventriculomegaly	4	101	0.905072504019432
HP:0000568	Microphthalmia	2	60	0.908948819343734
HP:0000212	Gingival overgrowth	1	36	0.909757228784132
HP:0002705	High, narrow palate	1	36	0.909757228784132
HP:0200034	Papule	1	36	0.909757228784132
HP:0002321	Vertigo	1	37	0.915491262658665
HP:0003510	Severe short stature	1	37	0.915491262658665
HP:0000823	Delayed puberty	2	62	0.918137770313675
HP:0000232	Everted lower lip vermilion	1	38	0.920863664729809
HP:0001310	Dysmetria	1	38	0.920863664729809
HP:0002721	Immunodeficiency	1	38	0.920863664729809
HP:0000505	Visual impairment	3	85	0.922348162130614
HP:0007018	Attention deficit hyperactivity disorder	2	63	0.922401203412533
HP:0008734	Decreased testicular size	1	39	0.925897071213426
HP:0000347	Micrognathia	9	203	0.928222179047468
HP:0030680	Abnormality of cardiovascular system morphology	2	65	0.930313094082785
HP:0000682	Abnormality of dental enamel	1	40	0.930612712136208
HP:0001231	Abnormal fingernail morphology	1	40	0.930612712136208
HP:0003196	Short nose	3	88	0.932681064542812
HP:0001824	Weight loss	2	66	0.933979443531895
HP:0000076	Vesicoureteral reflux	1	41	0.935030498023443
HP:0000219	Thin upper lip vermilion	1	41	0.935030498023443
HP:0002514	Cerebral calcification	1	41	0.935030498023443
HP:0011220	Prominent forehead	1	41	0.935030498023443
HP:0002120	Cerebral cortical atrophy	3	89	0.935836579174676
HP:0010864	Intellectual disability, severe	3	89	0.935836579174676
HP:0000093	Proteinuria	1	42	0.93916910128383
HP:0000670	Carious teeth	1	42	0.93916910128383
HP:0001363	Craniosynostosis	1	42	0.93916910128383
HP:0002067	Bradykinesia	1	42	0.93916910128383
HP:0000952	Jaundice	1	43	0.943046032613237
HP:0001596	Alopecia	2	69	0.94392091932885
HP:0001263	Global developmental delay	18	370	0.945373963383215
HP:0000717	Autism	1	44	0.946677712719883
HP:0001903	Anemia	3	93	0.947151742716201
HP:0000135	Hypogonadism	1	45	0.950079539655222
HP:0000718	Aggressive behavior	1	45	0.950079539655222
HP:0007957	Corneal opacity	1	45	0.950079539655222
HP:0001945	Fever	2	72	0.952438188532482
HP:0002073	Progressive cerebellar ataxia	1	46	0.953265952017655
HP:0000278	Retrognathia	1	47	0.956250488280085
HP:0000708	Behavioral abnormality	1	47	0.956250488280085
HP:0000926	Platyspondyly	1	47	0.956250488280085
HP:0000975	Hyperhidrosis	1	47	0.956250488280085
HP:0000982	Palmoplantar keratoderma	1	47	0.956250488280085
HP:0002019	Constipation	2	74	0.95741942361028
HP:0002750	Delayed skeletal maturation	3	102	0.966213784811303
HP:0000822	Hypertension	2	79	0.967794495941074
HP:0002024	Malabsorption	1	52	0.968562602673635
HP:0000612	Iris coloboma	1	53	0.970576386132263
HP:0002652	Skeletal dysplasia	1	53	0.970576386132263
HP:0000369	Low-set ears	3	106	0.972429744743806
HP:0000426	Prominent nasal bridge	1	54	0.972462131476788
HP:0000729	Autistic behavior	1	54	0.972462131476788
HP:0001332	Dystonia	2	82	0.972810310885471
HP:0012378	Fatigue	3	107	0.973806752535242
HP:0000938	Osteopenia	1	55	0.974227918466062
HP:0002014	Diarrhea	1	55	0.974227918466062
HP:0002079	Hypoplasia of the corpus callosum	2	84	0.975729023634626
HP:0002205	Recurrent respiratory infections	2	84	0.975729023634626
HP:0005930	Abnormality of epiphysis morphology	1	56	0.975881320845531
HP:0001272	Cerebellar atrophy	2	85	0.977073307398473
HP:0000028	Cryptorchidism	7	198	0.979498900092956
HP:0100490	Camptodactyly of finger	2	87	0.979550669330727
HP:0002342	Intellectual disability, moderate	1	59	0.980236014541579
HP:0000400	Macrotia	1	61	0.982696027564237
HP:0000405	Conductive hearing impairment	1	61	0.982696027564237
HP:0002017	Nausea and vomiting	1	61	0.982696027564237
HP:0001257	Spasticity	2	90	0.982790410695051
HP:0000944	Abnormality of the metaphysis	1	62	0.983809562051932
HP:0011800	Midface retrusion	1	63	0.984851971444602
HP:0000431	Wide nasal bridge	3	118	0.985241899795039
HP:0001999	Abnormal facial shape	1	64	0.985827764695103
HP:0002066	Gait ataxia	1	66	0.987596137875689
HP:0002983	Micromelia	1	68	0.989145390750087
HP:0000939	Osteoporosis	1	75	0.993202802241957
HP:0001629	Ventricular septal defect	1	76	0.993643361355904
HP:0000047	Hypospadias	1	77	0.99405557775794
HP:0000023	Inguinal hernia	1	78	0.994441261178383
HP:0001537	Umbilical hernia	1	78	0.994441261178383
HP:0000639	Nystagmus	6	215	0.996363322247733
HP:0000368	Low-set, posteriorly rotated ears	1	87	0.996965583191011
HP:0000256	Macrocephaly	2	123	0.997582613530676
HP:0001511	Intrauterine growth retardation	2	128	0.998220790443935
HP:0001249	Intellectual disability	14	398	0.998479352607841
HP:0005692	Joint hyperflexibility	1	98	0.998557797368322
HP:0000286	Epicanthus	2	133	0.998693269810345
HP:0001508	Failure to thrive	4	192	0.998975288687944
HP:0000365	Hearing impairment	3	168	0.999103406917962
HP:0004209	Clinodactyly of the 5th finger	1	106	0.999162707036296
HP:0000316	Hypertelorism	5	225	0.999345886034914
HP:0000494	Downslanted palpebral fissures	1	120	0.999678524554027
HP:0001250	Seizures	13	432	0.999872045975158
HP:0004322	Short stature	10	370	0.999874964679387
HP:0000175	Cleft palate	1	141	0.999924565795957
HP:0000002	Abnormality of body height	0	1	1
HP:0000003	Multicystic kidney dysplasia	0	35	1
HP:0000008	Abnormality of female internal genitalia	0	8	1
HP:0000009	Functional abnormality of the bladder	0	3	1
HP:0000010	Recurrent urinary tract infections	0	23	1
HP:0000011	Neurogenic bladder	0	11	1
HP:0000012	Urinary urgency	0	15	1
HP:0000013	Hypoplasia of the uterus	0	8	1
HP:0000015	Bladder diverticulum	0	6	1
HP:0000017	Nocturia	0	3	1
HP:0000021	Megacystis	0	3	1
HP:0000022	Abnormality of male internal genitalia	0	1	1
HP:0000024	Prostatitis	0	2	1
HP:0000025	Functional abnormality of male internal genitalia	0	1	1
HP:0000026	Male hypogonadism	0	9	1
HP:0000027	Azoospermia	0	11	1
HP:0000030	Testicular gonadoblastoma	0	2	1
HP:0000033	Ambiguous genitalia, male	0	9	1
HP:0000034	Hydrocele testis	0	4	1
HP:0000035	Abnormal testis morphology	0	6	1
HP:0000036	Abnormality of the penis	0	1	1
HP:0000037	Male pseudohermaphroditism	0	18	1
HP:0000039	Epispadias	0	10	1
HP:0000040	Long penis	0	8	1
HP:0000041	Chordee	0	1	1
HP:0000042	Absent external genitalia	0	1	1
HP:0000045	Abnormality of the scrotum	0	2	1
HP:0000046	Scrotal hypoplasia	0	16	1
HP:0000048	Bifid scrotum	0	15	1
HP:0000049	Shawl scrotum	0	7	1
HP:0000050	Hypoplastic male external genitalia	0	2	1
HP:0000051	Perineal hypospadias	0	4	1
HP:0000053	Macroorchidism	0	11	1
HP:0000055	Abnormality of female external genitalia	0	7	1
HP:0000056	Abnormality of the clitoris	0	2	1
HP:0000058	Abnormality of the labia	0	1	1
HP:0000059	Hypoplastic labia majora	0	5	1
HP:0000060	Clitoral hypoplasia	0	4	1
HP:0000061	Ambiguous genitalia, female	0	5	1
HP:0000062	Ambiguous genitalia	0	28	1
HP:0000063	Fused labia minora	0	2	1
HP:0000064	Hypoplastic labia minora	0	4	1
HP:0000065	Labial hypertrophy	0	1	1
HP:0000066	Labial hypoplasia	0	2	1
HP:0000068	Urethral atresia	0	3	1
HP:0000070	Ureterocele	0	4	1
HP:0000071	Ureteral stenosis	0	3	1
HP:0000072	Hydroureter	0	15	1
HP:0000073	Ureteral duplication	0	7	1
HP:0000074	Ureteropelvic junction obstruction	0	4	1
HP:0000075	Renal duplication	0	5	1
HP:0000077	Abnormality of the kidney	0	9	1
HP:0000078	Abnormality of the genital system	0	5	1
HP:0000079	Abnormality of the urinary system	0	3	1
HP:0000080	Abnormality of reproductive system physiology	0	1	1
HP:0000081	Duplicated collecting system	0	2	1
HP:0000085	Horseshoe kidney	0	20	1
HP:0000086	Ectopic kidney	0	13	1
HP:0000089	Renal hypoplasia	0	12	1
HP:0000090	Nephronophthisis	0	2	1
HP:0000091	Abnormal renal tubule morphology	0	11	1
HP:0000096	Glomerulosclerosis	0	2	1
HP:0000097	Focal segmental glomerulosclerosis	0	2	1
HP:0000099	Glomerulonephritis	0	1	1
HP:0000104	Renal agenesis	0	18	1
HP:0000105	Enlarged kidney	0	3	1
HP:0000107	Renal cyst	0	10	1
HP:0000110	Renal dysplasia	0	14	1
HP:0000112	Nephropathy	0	32	1
HP:0000113	Polycystic kidney dysplasia	0	5	1
HP:0000117	Renal phosphate wasting	0	1	1
HP:0000121	Nephrocalcinosis	0	18	1
HP:0000122	Unilateral renal agenesis	0	8	1
HP:0000123	Nephritis	0	3	1
HP:0000124	Renal tubular dysfunction	0	6	1
HP:0000125	Pelvic kidney	0	3	1
HP:0000126	Hydronephrosis	0	62	1
HP:0000127	Renal salt wasting	0	6	1
HP:0000128	Renal potassium wasting	0	1	1
HP:0000130	Abnormality of the uterus	0	8	1
HP:0000131	Uterine leiomyoma	0	4	1
HP:0000132	Menorrhagia	0	11	1
HP:0000133	Gonadal dysgenesis	0	5	1
HP:0000134	Female hypogonadism	0	5	1
HP:0000137	Abnormality of the ovary	0	4	1
HP:0000138	Ovarian cyst	0	2	1
HP:0000139	Uterine prolapse	0	2	1
HP:0000140	Abnormality of the menstrual cycle	0	8	1
HP:0000141	Amenorrhea	0	7	1
HP:0000142	Abnormal vagina morphology	0	5	1
HP:0000143	Rectovaginal fistula	0	5	1
HP:0000147	Polycystic ovaries	0	23	1
HP:0000148	Vaginal atresia	0	4	1
HP:0000149	Ovarian gonadoblastoma	0	1	1
HP:0000150	Gonadoblastoma	0	3	1
HP:0000151	Aplasia of the uterus	0	9	1
HP:0000153	Abnormality of the mouth	0	2	1
HP:0000154	Wide mouth	0	52	1
HP:0000155	Oral ulcer	0	5	1
HP:0000157	Abnormality of the tongue	0	6	1
HP:0000161	Median cleft lip	0	8	1
HP:0000162	Glossoptosis	0	15	1
HP:0000163	Abnormal oral cavity morphology	0	3	1
HP:0000164	Abnormality of the dentition	0	32	1
HP:0000166	Severe periodontitis	0	2	1
HP:0000168	Abnormality of the gingiva	0	6	1
HP:0000169	Gingival fibromatosis	0	8	1
HP:0000171	Microglossia	0	6	1
HP:0000172	Abnormality of the uvula	0	1	1
HP:0000177	Abnormality of upper lip	0	2	1
HP:0000179	Thick lower lip vermilion	0	29	1
HP:0000180	Lobulated tongue	0	3	1
HP:0000182	Movement abnormality of the tongue	0	2	1
HP:0000183	Difficulty in tongue movements	0	4	1
HP:0000185	Cleft soft palate	0	3	1
HP:0000187	Broad alveolar ridges	0	6	1
HP:0000188	Short upper lip	0	4	1
HP:0000189	Narrow palate	0	13	1
HP:0000190	Abnormal oral frenulum morphology	0	9	1
HP:0000191	Accessory oral frenulum	0	6	1
HP:0000196	Lower lip pit	0	1	1
HP:0000199	Tongue nodules	0	5	1
HP:0000200	Short lingual frenulum	0	2	1
HP:0000201	Pierre-Robin sequence	0	4	1
HP:0000202	Oral cleft	0	19	1
HP:0000204	Cleft upper lip	0	20	1
HP:0000206	Glossitis	0	4	1
HP:0000207	Triangular mouth	0	2	1
HP:0000214	Lip telangiectasia	0	1	1
HP:0000215	Thick upper lip vermilion	0	3	1
HP:0000216	Broad secondary alveolar ridge	0	1	1
HP:0000217	Xerostomia	0	7	1
HP:0000220	Velopharyngeal insufficiency	0	4	1
HP:0000221	Furrowed tongue	0	7	1
HP:0000225	Gingival bleeding	0	19	1
HP:0000230	Gingivitis	0	12	1
HP:0000233	Thin vermilion border	0	40	1
HP:0000235	Abnormality of the fontanelles or cranial sutures	0	1	1
HP:0000237	Small anterior fontanelle	0	1	1
HP:0000244	Brachyturricephaly	0	3	1
HP:0000246	Sinusitis	0	11	1
HP:0000248	Brachycephaly	0	62	1
HP:0000260	Wide anterior fontanel	0	12	1
HP:0000263	Oxycephaly	0	2	1
HP:0000264	Abnormality of the mastoid	0	1	1
HP:0000267	Cranial asymmetry	0	2	1
HP:0000269	Prominent occiput	0	20	1
HP:0000270	Delayed cranial suture closure	0	14	1
HP:0000272	Malar flattening	0	69	1
HP:0000273	Facial grimacing	0	3	1
HP:0000274	Small face	0	1	1
HP:0000277	Abnormality of the mandible	0	1	1
HP:0000280	Coarse facial features	0	69	1
HP:0000282	Facial edema	0	2	1
HP:0000287	Increased facial adipose tissue	0	1	1
HP:0000288	Abnormality of the philtrum	0	3	1
HP:0000289	Broad philtrum	0	5	1
HP:0000290	Abnormality of the forehead	0	2	1
HP:0000292	Loss of facial adipose tissue	0	3	1
HP:0000300	Oval face	0	3	1
HP:0000303	Mandibular prognathia	0	52	1
HP:0000307	Pointed chin	0	25	1
HP:0000308	Microretrognathia	0	12	1
HP:0000309	Abnormality of the midface	0	1	1
HP:0000311	Round face	0	37	1
HP:0000315	Abnormality of the orbital region	0	1	1
HP:0000317	Facial myokymia	0	2	1
HP:0000319	Smooth philtrum	0	35	1
HP:0000320	Bird-like facies	0	5	1
HP:0000321	Square face	0	2	1
HP:0000322	Short philtrum	0	54	1
HP:0000324	Facial asymmetry	0	38	1
HP:0000325	Triangular face	0	29	1
HP:0000326	Abnormality of the maxilla	0	1	1
HP:0000327	Hypoplasia of the maxilla	0	37	1
HP:0000331	Short chin	0	10	1
HP:0000336	Prominent supraorbital ridges	0	13	1
HP:0000337	Broad forehead	0	41	1
HP:0000338	Hypomimic face	0	15	1
HP:0000340	Sloping forehead	0	31	1
HP:0000348	High forehead	0	64	1
HP:0000349	Widow's peak	0	5	1
HP:0000350	Small forehead	0	1	1
HP:0000356	Abnormality of the outer ear	0	1	1
HP:0000360	Tinnitus	0	11	1
HP:0000362	Otosclerosis	0	1	1
HP:0000363	Abnormality of earlobe	0	4	1
HP:0000364	Hearing abnormality	0	13	1
HP:0000366	Abnormality of the nose	0	5	1
HP:0000370	Abnormality of the middle ear	0	4	1
HP:0000371	Acute otitis media	0	2	1
HP:0000372	Abnormality of the auditory canal	0	1	1
HP:0000375	Abnormal cochlea morphology	0	6	1
HP:0000377	Abnormality of the pinna	0	7	1
HP:0000378	Cupped ear	0	8	1
HP:0000381	Stapes ankylosis	0	1	1
HP:0000384	Preauricular skin tag	0	20	1
HP:0000387	Absent earlobe	0	3	1
HP:0000388	Otitis media	0	6	1
HP:0000389	Chronic otitis media	0	29	1
HP:0000391	Thickened helices	0	10	1
HP:0000394	Lop ear	0	1	1
HP:0000395	Prominent antihelix	0	1	1
HP:0000399	Prelingual sensorineural hearing impairment	0	3	1
HP:0000402	Stenosis of the external auditory canal	0	7	1
HP:0000403	Recurrent otitis media	0	14	1
HP:0000410	Mixed hearing impairment	0	1	1
HP:0000413	Atresia of the external auditory canal	0	16	1
HP:0000414	Bulbous nose	0	34	1
HP:0000418	Narrow nasal ridge	0	1	1
HP:0000419	Abnormality of the nasal septum	0	1	1
HP:0000421	Epistaxis	0	24	1
HP:0000430	Underdeveloped nasal alae	0	33	1
HP:0000433	Abnormality of the nasal mucosa	0	1	1
HP:0000437	Depressed nasal tip	0	4	1
HP:0000444	Convex nasal ridge	0	24	1
HP:0000445	Wide nose	0	29	1
HP:0000446	Narrow nasal bridge	0	14	1
HP:0000447	Pear-shaped nose	0	1	1
HP:0000448	Prominent nose	0	25	1
HP:0000451	Triangular nasal tip	0	1	1
HP:0000452	Choanal stenosis	0	2	1
HP:0000453	Choanal atresia	0	32	1
HP:0000454	Flared nostrils	0	1	1
HP:0000455	Broad nasal tip	0	27	1
HP:0000456	Bifid nasal tip	0	3	1
HP:0000457	Depressed nasal ridge	0	34	1
HP:0000458	Anosmia	0	6	1
HP:0000460	Narrow nose	0	1	1
HP:0000463	Anteverted nares	0	109	1
HP:0000464	Abnormality of the neck	0	5	1
HP:0000465	Webbed neck	0	25	1
HP:0000468	Increased adipose tissue around the neck	0	2	1
HP:0000472	Long neck	0	1	1
HP:0000475	Broad neck	0	6	1
HP:0000476	Cystic hygroma	0	6	1
HP:0000479	Abnormal retinal morphology	0	2	1
HP:0000480	Retinal coloboma	0	6	1
HP:0000481	Abnormal cornea morphology	0	1	1
HP:0000483	Astigmatism	0	20	1
HP:0000484	Hyperopic astigmatism	0	2	1
HP:0000488	Retinopathy	0	38	1
HP:0000490	Deeply set eye	0	57	1
HP:0000491	Keratitis	0	10	1
HP:0000492	Abnormal eyelid morphology	0	3	1
HP:0000493	Abnormal foveal morphology	0	1	1
HP:0000495	Recurrent corneal erosions	0	2	1
HP:0000498	Blepharitis	0	16	1
HP:0000503	Tortuosity of conjunctival vessels	0	1	1
HP:0000504	Abnormality of vision	0	39	1
HP:0000506	Telecanthus	0	51	1
HP:0000509	Conjunctivitis	0	16	1
HP:0000510	Rod-cone dystrophy	0	13	1
HP:0000511	Vertical supranuclear gaze palsy	0	7	1
HP:0000512	Abnormal electroretinogram	0	19	1
HP:0000514	Slow saccadic eye movements	0	13	1
HP:0000517	Abnormality of the lens	0	1	1
HP:0000520	Proptosis	0	83	1
HP:0000522	Alacrima	0	2	1
HP:0000524	Conjunctival telangiectasia	0	6	1
HP:0000526	Aniridia	0	6	1
HP:0000527	Long eyelashes	0	23	1
HP:0000529	Progressive visual loss	0	18	1
HP:0000531	Corneal crystals	0	2	1
HP:0000532	Abnormal chorioretinal morphology	0	7	1
HP:0000533	Chorioretinal atrophy	0	4	1
HP:0000535	Sparse and thin eyebrow	0	16	1
HP:0000537	Epicanthus inversus	0	2	1
HP:0000538	Pseudopapilledema	0	2	1
HP:0000539	Abnormality of refraction	0	1	1
HP:0000540	Hypermetropia	0	18	1
HP:0000546	Retinal degeneration	0	4	1
HP:0000548	Cone/cone-rod dystrophy	0	4	1
HP:0000549	Abnormal conjugate eye movement	0	1	1
HP:0000552	Tritanomaly	0	1	1
HP:0000554	Uveitis	0	9	1
HP:0000555	Leukocoria	0	1	1
HP:0000557	Buphthalmos	0	3	1
HP:0000558	Rieger anomaly	0	1	1
HP:0000559	Corneal scarring	0	2	1
HP:0000561	Absent eyelashes	0	9	1
HP:0000563	Keratoconus	0	8	1
HP:0000564	Lacrimal duct atresia	0	2	1
HP:0000567	Chorioretinal coloboma	0	18	1
HP:0000570	Abnormal saccadic eye movements	0	9	1
HP:0000571	Hypometric saccades	0	6	1
HP:0000572	Visual loss	0	37	1
HP:0000573	Retinal hemorrhage	0	5	1
HP:0000574	Thick eyebrow	0	37	1
HP:0000575	Scotoma	0	3	1
HP:0000576	Centrocecal scotoma	0	1	1
HP:0000577	Exotropia	0	13	1
HP:0000579	Nasolacrimal duct obstruction	0	3	1
HP:0000582	Upslanted palpebral fissure	0	56	1
HP:0000585	Band keratopathy	0	1	1
HP:0000586	Shallow orbits	0	4	1
HP:0000587	Abnormality of the optic nerve	0	10	1
HP:0000588	Optic nerve coloboma	0	10	1
HP:0000592	Blue sclerae	0	29	1
HP:0000593	Abnormal anterior chamber morphology	0	8	1
HP:0000594	Shallow anterior chamber	0	1	1
HP:0000599	Abnormality of the frontal hairline	0	1	1
HP:0000603	Central scotoma	0	8	1
HP:0000605	Supranuclear gaze palsy	0	7	1
HP:0000607	Periorbital wrinkles	0	1	1
HP:0000608	Macular degeneration	0	7	1
HP:0000610	Abnormal choroid morphology	0	4	1
HP:0000613	Photophobia	0	47	1
HP:0000614	Abnormal nasolacrimal system morphology	0	11	1
HP:0000615	Abnormal pupil morphology	0	11	1
HP:0000616	Miosis	0	4	1
HP:0000617	Abnormality of ocular smooth pursuit	0	3	1
HP:0000620	Dacryocystitis	0	1	1
HP:0000621	Entropion	0	5	1
HP:0000622	Blurred vision	0	8	1
HP:0000623	Supranuclear ophthalmoplegia	0	5	1
HP:0000625	Eyelid coloboma	0	11	1
HP:0000627	Posterior embryotoxon	0	7	1
HP:0000629	Periorbital fullness	0	3	1
HP:0000632	Lacrimation abnormality	0	9	1
HP:0000633	Decreased lacrimation	0	3	1
HP:0000634	Impaired ocular abduction	0	1	1
HP:0000635	Blue irides	0	2	1
HP:0000636	Upper eyelid coloboma	0	2	1
HP:0000637	Long palpebral fissure	0	12	1
HP:0000640	Gaze-evoked nystagmus	0	15	1
HP:0000641	Dysmetric saccades	0	8	1
HP:0000642	Red-green dyschromatopsia	0	2	1
HP:0000646	Amblyopia	0	19	1
HP:0000647	Sclerocornea	0	10	1
HP:0000651	Diplopia	0	28	1
HP:0000652	Lower eyelid coloboma	0	1	1
HP:0000653	Sparse eyelashes	0	12	1
HP:0000658	Eyelid apraxia	0	2	1
HP:0000659	Peters anomaly	0	3	1
HP:0000664	Synophrys	0	38	1
HP:0000666	Horizontal nystagmus	0	17	1
HP:0000667	Phthisis bulbi	0	1	1
HP:0000668	Hypodontia	0	42	1
HP:0000674	Anodontia	0	6	1
HP:0000675	Macrodontia of permanent maxillary central incisor	0	3	1
HP:0000677	Oligodontia	0	15	1
HP:0000678	Dental crowding	0	21	1
HP:0000679	Taurodontia	0	10	1
HP:0000680	Delayed eruption of primary teeth	0	1	1
HP:0000684	Delayed eruption of teeth	0	56	1
HP:0000685	Hypoplasia of teeth	0	4	1
HP:0000687	Widely spaced teeth	0	16	1
HP:0000691	Microdontia	0	31	1
HP:0000692	Misalignment of teeth	0	9	1
HP:0000695	Natal tooth	0	8	1
HP:0000696	Delayed eruption of permanent teeth	0	3	1
HP:0000698	Conical tooth	0	6	1
HP:0000699	Diastema	0	1	1
HP:0000703	Dentinogenesis imperfecta	0	1	1
HP:0000704	Periodontitis	0	12	1
HP:0000705	Amelogenesis imperfecta	0	3	1
HP:0000706	Unerupted tooth	0	1	1
HP:0000707	Abnormality of the nervous system	0	1	1
HP:0000709	Psychosis	0	21	1
HP:0000710	Hyperorality	0	1	1
HP:0000711	Restlessness	0	7	1
HP:0000712	Emotional lability	0	20	1
HP:0000713	Agitation	0	16	1
HP:0000719	Inappropriate behavior	0	4	1
HP:0000720	Mood swings	0	1	1
HP:0000722	Obsessive-compulsive behavior	0	25	1
HP:0000723	Restrictive behavior	0	1	1
HP:0000727	Frontal lobe dementia	0	2	1
HP:0000733	Stereotypy	0	31	1
HP:0000734	Disinhibition	0	4	1
HP:0000735	Impaired social interactions	0	6	1
HP:0000736	Short attention span	0	14	1
HP:0000740	Episodic paroxysmal anxiety	0	1	1
HP:0000741	Apathy	0	18	1
HP:0000742	Self-mutilation	0	7	1
HP:0000743	Frontal release signs	0	1	1
HP:0000744	Low frustration tolerance	0	4	1
HP:0000746	Delusions	0	6	1
HP:0000748	Inappropriate laughter	0	2	1
HP:0000749	Paroxysmal bursts of laughter	0	2	1
HP:0000751	Personality changes	0	10	1
HP:0000752	Hyperactivity	0	38	1
HP:0000757	Lack of insight	0	1	1
HP:0000766	Abnormality of the sternum	0	5	1
HP:0000773	Short ribs	0	7	1
HP:0000778	Hypoplasia of the thymus	0	6	1
HP:0000782	Abnormality of the scapula	0	1	1
HP:0000786	Primary amenorrhea	0	22	1
HP:0000789	Infertility	0	15	1
HP:0000790	Hematuria	0	28	1
HP:0000791	Uric acid nephrolithiasis	0	1	1
HP:0000793	Membranoproliferative glomerulonephritis	0	1	1
HP:0000795	Abnormality of the urethra	0	3	1
HP:0000796	Urethral obstruction	0	1	1
HP:0000798	Oligospermia	0	7	1
HP:0000799	Renal steatosis	0	2	1
HP:0000802	Impotence	0	13	1
HP:0000803	Renal cortical cysts	0	1	1
HP:0000805	Enuresis	0	4	1
HP:0000807	Glandular hypospadias	0	3	1
HP:0000808	Penoscrotal hypospadias	0	3	1
HP:0000811	Abnormal external genitalia	0	1	1
HP:0000813	Bicornuate uterus	0	7	1
HP:0000816	Abnormality of Krebs cycle metabolism	0	2	1
HP:0000820	Abnormality of the thyroid gland	0	6	1
HP:0000824	Growth hormone deficiency	0	20	1
HP:0000825	Hyperinsulinemic hypoglycemia	0	13	1
HP:0000826	Precocious puberty	0	24	1
HP:0000828	Abnormality of the parathyroid gland	0	2	1
HP:0000831	Insulin-resistant diabetes mellitus	0	9	1
HP:0000832	Primary hypothyroidism	0	2	1
HP:0000834	Abnormality of the adrenal glands	0	5	1
HP:0000835	Adrenal hypoplasia	0	8	1
HP:0000837	Increased circulating gonadotropin level	0	9	1
HP:0000839	Pituitary dwarfism	0	2	1
HP:0000840	Adrenogenital syndrome	0	3	1
HP:0000842	Hyperinsulinemia	0	20	1
HP:0000843	Hyperparathyroidism	0	7	1
HP:0000845	Growth hormone excess	0	10	1
HP:0000846	Adrenal insufficiency	0	6	1
HP:0000848	Increased circulating renin level	0	4	1
HP:0000851	Congenital hypothyroidism	0	10	1
HP:0000852	Pseudohypoparathyroidism	0	4	1
HP:0000854	Thyroid adenoma	0	5	1
HP:0000855	Insulin resistance	0	20	1
HP:0000857	Neonatal insulin-dependent diabetes mellitus	0	4	1
HP:0000858	Menstrual irregularities	0	1	1
HP:0000859	Hyperaldosteronism	0	5	1
HP:0000860	Parathyroid hypoplasia	0	1	1
HP:0000863	Central diabetes insipidus	0	2	1
HP:0000864	Abnormality of the hypothalamus-pituitary axis	0	16	1
HP:0000867	Secondary hyperparathyroidism	0	1	1
HP:0000868	Decreased fertility in females	0	10	1
HP:0000869	Secondary amenorrhea	0	9	1
HP:0000870	Increased circulating prolactin concentration	0	6	1
HP:0000871	Panhypopituitarism	0	2	1
HP:0000872	Hashimoto thyroiditis	0	5	1
HP:0000876	Oligomenorrhea	0	12	1
HP:0000877	Insulin-resistant diabetes mellitus at puberty	0	2	1
HP:0000878	11 pairs of ribs	0	4	1
HP:0000879	Short sternum	0	2	1
HP:0000882	Hypoplastic scapulae	0	7	1
HP:0000884	Prominent sternum	0	1	1
HP:0000885	Broad ribs	0	4	1
HP:0000886	Deformed rib cage	0	1	1
HP:0000888	Horizontal ribs	0	1	1
HP:0000889	Abnormality of the clavicle	0	18	1
HP:0000890	Long clavicles	0	1	1
HP:0000891	Cervical ribs	0	5	1
HP:0000892	Bifid ribs	0	2	1
HP:0000894	Short clavicles	0	7	1
HP:0000895	Lateral clavicle hook	0	1	1
HP:0000897	Rachitic rosary	0	2	1
HP:0000902	Rib fusion	0	10	1
HP:0000905	Progressive clavicular acroosteolysis	0	1	1
HP:0000913	Posterior rib fusion	0	1	1
HP:0000914	Shield chest	0	1	1
HP:0000916	Broad clavicles	0	2	1
HP:0000920	Enlargement of the costochondral junction	0	1	1
HP:0000921	Missing ribs	0	7	1
HP:0000924	Abnormality of the skeletal system	0	2	1
HP:0000925	Abnormality of the vertebral column	0	1	1
HP:0000929	Abnormal skull morphology	0	2	1
HP:0000932	Abnormality of the posterior cranial fossa	0	2	1
HP:0000934	Chondrocalcinosis	0	10	1
HP:0000935	Thickened cortex of long bones	0	2	1
HP:0000940	Abnormal diaphysis morphology	0	6	1
HP:0000943	Dysostosis multiplex	0	4	1
HP:0000946	Hypoplastic ilia	0	5	1
HP:0000947	Dumbbell-shaped long bone	0	3	1
HP:0000951	Abnormality of the skin	0	7	1
HP:0000953	Hyperpigmentation of the skin	0	17	1
HP:0000954	Single transverse palmar crease	0	15	1
HP:0000956	Acanthosis nigricans	0	33	1
HP:0000957	Cafe-au-lait spot	0	6	1
HP:0000958	Dry skin	0	48	1
HP:0000960	Sacral dimple	0	23	1
HP:0000961	Cyanosis	0	8	1
HP:0000962	Hyperkeratosis	0	31	1
HP:0000963	Thin skin	0	40	1
HP:0000964	Eczema	0	27	1
HP:0000965	Cutis marmorata	0	16	1
HP:0000966	Hypohidrosis	0	30	1
HP:0000967	Petechiae	0	11	1
HP:0000968	Ectodermal dysplasia	0	3	1
HP:0000969	Edema	0	17	1
HP:0000970	Anhidrosis	0	2	1
HP:0000972	Palmoplantar hyperkeratosis	0	4	1
HP:0000973	Cutis laxa	0	6	1
HP:0000974	Hyperextensible skin	0	27	1
HP:0000976	Eczematoid dermatitis	0	2	1
HP:0000977	Soft skin	0	2	1
HP:0000978	Bruising susceptibility	0	42	1
HP:0000979	Purpura	0	10	1
HP:0000980	Pallor	0	37	1
HP:0000987	Atypical scarring of skin	0	12	1
HP:0000988	Skin rash	0	32	1
HP:0000989	Pruritus	0	42	1
HP:0000991	Xanthomatosis	0	6	1
HP:0000992	Cutaneous photosensitivity	0	28	1
HP:0000995	Melanocytic nevus	0	20	1
HP:0000996	Facial capillary hemangioma	0	1	1
HP:0000998	Hypertrichosis	0	10	1
HP:0001000	Abnormality of skin pigmentation	0	18	1
HP:0001001	Abnormality of subcutaneous fat tissue	0	2	1
HP:0001003	Multiple lentigines	0	5	1
HP:0001004	Lymphedema	0	23	1
HP:0001005	Dermatological manifestations of systemic disorders	0	2	1
HP:0001006	Hypotrichosis	0	24	1
HP:0001007	Hirsutism	0	17	1
HP:0001009	Telangiectasia	0	6	1
HP:0001010	Hypopigmentation of the skin	0	11	1
HP:0001013	Eruptive xanthomas	0	1	1
HP:0001014	Angiokeratoma	0	1	1
HP:0001015	Prominent superficial veins	0	1	1
HP:0001017	Anemic pallor	0	2	1
HP:0001018	Abnormal palmar dermatoglyphics	0	1	1
HP:0001019	Erythroderma	0	12	1
HP:0001022	Albinism	0	5	1
HP:0001025	Urticaria	0	20	1
HP:0001027	Soft, doughy skin	0	3	1
HP:0001028	Hemangioma	0	12	1
HP:0001029	Poikiloderma	0	7	1
HP:0001030	Fragile skin	0	4	1
HP:0001031	Subcutaneous lipoma	0	4	1
HP:0001034	Hypermelanotic macule	0	16	1
HP:0001036	Parakeratosis	0	1	1
HP:0001038	Warfarin-induced skin necrosis	0	1	1
HP:0001040	Multiple pterygia	0	1	1
HP:0001041	Facial erythema	0	1	1
HP:0001043	Prominent scalp veins	0	2	1
HP:0001045	Vitiligo	0	5	1
HP:0001046	Intermittent jaundice	0	1	1
HP:0001047	Atopic dermatitis	0	2	1
HP:0001051	Seborrheic dermatitis	0	4	1
HP:0001052	Nevus flammeus	0	9	1
HP:0001055	Erysipelas	0	5	1
HP:0001056	Milia	0	21	1
HP:0001057	Aplasia cutis congenita	0	7	1
HP:0001058	Poor wound healing	0	5	1
HP:0001059	Pterygium	0	7	1
HP:0001060	Axillary pterygium	0	1	1
HP:0001061	Acne	0	18	1
HP:0001063	Acrocyanosis	0	10	1
HP:0001065	Striae distensae	0	6	1
HP:0001067	Neurofibromas	0	1	1
HP:0001069	Episodic hyperhidrosis	0	2	1
HP:0001070	Mottled pigmentation	0	1	1
HP:0001071	Angiokeratoma corporis diffusum	0	1	1
HP:0001073	Cigarette-paper scars	0	2	1
HP:0001075	Atrophic scars	0	18	1
HP:0001080	Biliary tract abnormality	0	7	1
HP:0001081	Cholelithiasis	0	12	1
HP:0001084	Corneal arcus	0	2	1
HP:0001085	Papilledema	0	6	1
HP:0001087	Developmental glaucoma	0	4	1
HP:0001088	Brushfield spots	0	1	1
HP:0001090	Abnormally large globe	0	2	1
HP:0001092	Absent lacrimal punctum	0	3	1
HP:0001093	Optic nerve dysplasia	0	1	1
HP:0001094	Iridocyclitis	0	3	1
HP:0001095	Hypertensive retinopathy	0	2	1
HP:0001096	Keratoconjunctivitis	0	4	1
HP:0001097	Keratoconjunctivitis sicca	0	8	1
HP:0001100	Heterochromia iridis	0	8	1
HP:0001102	Angioid streaks of the fundus	0	2	1
HP:0001104	Macular hypoplasia	0	1	1
HP:0001105	Retinal atrophy	0	1	1
HP:0001106	Periorbital hyperpigmentation	0	1	1
HP:0001107	Ocular albinism	0	6	1
HP:0001112	Leber optic atrophy	0	1	1
HP:0001114	Xanthelasma	0	3	1
HP:0001115	Posterior polar cataract	0	1	1
HP:0001116	Macular coloboma	0	2	1
HP:0001117	Sudden loss of visual acuity	0	3	1
HP:0001118	Juvenile cataract	0	1	1
HP:0001119	Keratoglobus	0	3	1
HP:0001123	Visual field defect	0	12	1
HP:0001126	Cryptophthalmos	0	3	1
HP:0001129	Large central visual field defect	0	1	1
HP:0001131	Corneal dystrophy	0	12	1
HP:0001133	Constriction of peripheral visual field	0	3	1
HP:0001135	Chorioretinal dystrophy	0	3	1
HP:0001136	Retinal arteriolar tortuosity	0	5	1
HP:0001137	Alternating esotropia	0	3	1
HP:0001139	Choroideremia	0	4	1
HP:0001140	Limbal dermoid	0	3	1
HP:0001141	Severely reduced visual acuity	0	3	1
HP:0001142	Lenticonus	0	1	1
HP:0001149	Lattice corneal dystrophy	0	1	1
HP:0001151	Impaired horizontal smooth pursuit	0	1	1
HP:0001152	Saccadic smooth pursuit	0	13	1
HP:0001153	Septate vagina	0	1	1
HP:0001156	Brachydactyly	0	117	1
HP:0001159	Syndactyly	0	4	1
HP:0001161	Hand polydactyly	0	24	1
HP:0001162	Postaxial hand polydactyly	0	29	1
HP:0001163	Abnormality of the metacarpal bones	0	27	1
HP:0001166	Arachnodactyly	0	36	1
HP:0001167	Abnormality of finger	0	2	1
HP:0001169	Broad palm	0	3	1
HP:0001172	Abnormal thumb morphology	0	6	1
HP:0001176	Large hands	0	11	1
HP:0001177	Preaxial hand polydactyly	0	19	1
HP:0001180	Hand oligodactyly	0	4	1
HP:0001182	Tapered finger	0	29	1
HP:0001187	Hyperextensibility of the finger joints	0	2	1
HP:0001188	Hand clenching	0	5	1
HP:0001191	Abnormality of the carpal bones	0	5	1
HP:0001193	Ulnar deviation of the hand or of fingers of the hand	0	1	1
HP:0001195	Single umbilical artery	0	8	1
HP:0001196	Short umbilical cord	0	1	1
HP:0001197	Abnormality of prenatal development or birth	0	3	1
HP:0001199	Triphalangeal thumb	0	14	1
HP:0001204	Distal symphalangism of hands	0	1	1
HP:0001211	Abnormal fingertip morphology	0	3	1
HP:0001215	Camptodactyly of 2nd-5th fingers	0	1	1
HP:0001217	Clubbing	0	2	1
HP:0001225	Wrist swelling	0	1	1
HP:0001230	Broad metacarpals	0	3	1
HP:0001233	2-3 finger syndactyly	0	2	1
HP:0001234	Hitchhiker thumb	0	1	1
HP:0001241	Capitate-hamate fusion	0	1	1
HP:0001248	Short tubular bones of the hand	0	1	1
HP:0001262	Excessive daytime somnolence	0	12	1
HP:0001264	Spastic diplegia	0	9	1
HP:0001268	Mental deterioration	0	24	1
HP:0001269	Hemiparesis	0	18	1
HP:0001271	Polyneuropathy	0	10	1
HP:0001273	Abnormal corpus callosum morphology	0	8	1
HP:0001278	Orthostatic hypotension	0	4	1
HP:0001281	Tetany	0	2	1
HP:0001287	Meningitis	0	14	1
HP:0001291	Abnormal cranial nerve morphology	0	5	1
HP:0001297	Stroke	0	25	1
HP:0001301	Chronic sensorineural polyneuropathy	0	1	1
HP:0001304	Torsion dystonia	0	4	1
HP:0001308	Tongue fasciculations	0	4	1
HP:0001312	Giant somatosensory evoked potentials	0	1	1
HP:0001317	Abnormal cerebellum morphology	0	17	1
HP:0001325	Hypoglycemic coma	0	4	1
HP:0001326	EEG with irregular generalized spike and wave complexes	0	3	1
HP:0001327	Photomyoclonic seizures	0	1	1
HP:0001334	Communicating hydrocephalus	0	5	1
HP:0001335	Bimanual synkinesia	0	2	1
HP:0001338	Partial agenesis of the corpus callosum	0	4	1
HP:0001339	Lissencephaly	0	4	1
HP:0001341	Olfactory lobe agenesis	0	1	1
HP:0001342	Cerebral hemorrhage	0	14	1
HP:0001343	Kernicterus	0	1	1
HP:0001355	Megalencephaly	0	3	1
HP:0001357	Plagiocephaly	0	26	1
HP:0001361	Nystagmus-induced head nodding	0	1	1
HP:0001362	Calvarial skull defect	0	8	1
HP:0001367	Abnormal joint morphology	0	1	1
HP:0001369	Arthritis	0	30	1
HP:0001370	Rheumatoid arthritis	0	1	1
HP:0001373	Joint dislocation	0	27	1
HP:0001377	Limited elbow extension	0	4	1
HP:0001382	Joint hypermobility	0	17	1
HP:0001386	Joint swelling	0	17	1
HP:0001392	Abnormality of the liver	0	10	1
HP:0001395	Hepatic fibrosis	0	12	1
HP:0001402	Hepatocellular carcinoma	0	10	1
HP:0001404	Hepatocellular necrosis	0	1	1
HP:0001405	Periportal fibrosis	0	1	1
HP:0001406	Intrahepatic cholestasis	0	3	1
HP:0001407	Hepatic cysts	0	1	1
HP:0001408	Bile duct proliferation	0	1	1
HP:0001409	Portal hypertension	0	16	1
HP:0001410	Decreased liver function	0	9	1
HP:0001414	Microvesicular hepatic steatosis	0	2	1
HP:0001433	Hepatosplenomegaly	0	30	1
HP:0001440	Metatarsal synostosis	0	1	1
HP:0001476	Delayed closure of the anterior fontanelle	0	3	1
HP:0001480	Freckling	0	13	1
HP:0001482	Subcutaneous nodule	0	46	1
HP:0001491	Congenital fibrosis of extraocular muscles	0	1	1
HP:0001495	Carpal osteolysis	0	2	1
HP:0001498	Carpal bone hypoplasia	0	1	1
HP:0001500	Broad finger	0	2	1
HP:0001501	6 metacarpals	0	1	1
HP:0001504	Metacarpal osteolysis	0	1	1
HP:0001510	Growth delay	0	55	1
HP:0001519	Disproportionate tall stature	0	9	1
HP:0001525	Severe failure to thrive	0	5	1
HP:0001528	Hemihypertrophy	0	2	1
HP:0001530	Mild postnatal growth retardation	0	1	1
HP:0001538	Protuberant abdomen	0	4	1
HP:0001539	Omphalocele	0	23	1
HP:0001540	Diastasis recti	0	4	1
HP:0001541	Ascites	0	27	1
HP:0001543	Gastroschisis	0	1	1
HP:0001548	Overgrowth	0	3	1
HP:0001552	Barrel-shaped chest	0	3	1
HP:0001555	Asymmetry of the thorax	0	4	1
HP:0001560	Abnormality of the amniotic fluid	0	1	1
HP:0001562	Oligohydramnios	0	26	1
HP:0001563	Fetal polyuria	0	1	1
HP:0001566	Widely-spaced maxillary central incisors	0	5	1
HP:0001572	Macrodontia	0	5	1
HP:0001575	Mood changes	0	3	1
HP:0001580	Pigmented micronodular adrenocortical disease	0	2	1
HP:0001581	Recurrent skin infections	0	17	1
HP:0001582	Redundant skin	0	24	1
HP:0001591	Bell-shaped thorax	0	6	1
HP:0001592	Selective tooth agenesis	0	1	1
HP:0001595	Abnormal hair morphology	0	11	1
HP:0001597	Abnormality of the nail	0	25	1
HP:0001598	Concave nail	0	4	1
HP:0001600	Abnormality of the larynx	0	5	1
HP:0001602	Laryngeal stenosis	0	6	1
HP:0001607	Subglottic stenosis	0	3	1
HP:0001615	Hoarse cry	0	3	1
HP:0001627	Abnormal heart morphology	0	11	1
HP:0001631	Atrial septal defect	0	62	1
HP:0001633	Abnormal mitral valve morphology	0	2	1
HP:0001636	Tetralogy of Fallot	0	37	1
HP:0001637	Abnormal myocardium morphology	0	6	1
HP:0001641	Abnormal pulmonary valve morphology	0	9	1
HP:0001642	Pulmonic stenosis	0	25	1
HP:0001643	Patent ductus arteriosus	0	69	1
HP:0001646	Abnormal aortic valve morphology	0	10	1
HP:0001647	Bicuspid aortic valve	0	11	1
HP:0001649	Tachycardia	0	11	1
HP:0001650	Aortic valve stenosis	0	17	1
HP:0001651	Dextrocardia	0	4	1
HP:0001658	Myocardial infarction	0	19	1
HP:0001659	Aortic regurgitation	0	14	1
HP:0001660	Truncus arteriosus	0	3	1
HP:0001664	Torsade de pointes	0	2	1
HP:0001669	Transposition of the great arteries	0	6	1
HP:0001671	Abnormal cardiac septum morphology	0	26	1
HP:0001674	Complete atrioventricular canal defect	0	2	1
HP:0001677	Coronary artery atherosclerosis	0	11	1
HP:0001679	Abnormal aortic morphology	0	6	1
HP:0001680	Coarctation of aorta	0	18	1
HP:0001681	Angina pectoris	0	15	1
HP:0001682	Subvalvular aortic stenosis	0	2	1
HP:0001688	Sinus bradycardia	0	1	1
HP:0001695	Cardiac arrest	0	7	1
HP:0001696	Situs inversus totalis	0	8	1
HP:0001697	Abnormal pericardium morphology	0	1	1
HP:0001699	Sudden death	0	1	1
HP:0001701	Pericarditis	0	9	1
HP:0001702	Abnormal tricuspid valve morphology	0	5	1
HP:0001704	Tricuspid valve prolapse	0	4	1
HP:0001708	Right ventricular failure	0	3	1
HP:0001713	Abnormal cardiac ventricle morphology	0	1	1
HP:0001717	Coronary artery calcification	0	2	1
HP:0001718	Mitral stenosis	0	4	1
HP:0001719	Double outlet right ventricle	0	5	1
HP:0001723	Restrictive cardiomyopathy	0	2	1
HP:0001727	Thromboembolic stroke	0	1	1
HP:0001732	Abnormality of the pancreas	0	8	1
HP:0001734	Annular pancreas	0	5	1
HP:0001735	Acute pancreatitis	0	2	1
HP:0001737	Pancreatic cysts	0	4	1
HP:0001738	Exocrine pancreatic insufficiency	0	11	1
HP:0001741	Phimosis	0	2	1
HP:0001743	Abnormality of the spleen	0	6	1
HP:0001744	Splenomegaly	0	116	1
HP:0001746	Asplenia	0	5	1
HP:0001747	Accessory spleen	0	1	1
HP:0001748	Polysplenia	0	2	1
HP:0001756	Vestibular hypofunction	0	2	1
HP:0001757	High-frequency sensorineural hearing impairment	0	1	1
HP:0001760	Abnormality of the foot	0	10	1
HP:0001769	Broad foot	0	9	1
HP:0001770	Toe syndactyly	0	52	1
HP:0001773	Short foot	0	40	1
HP:0001776	Bilateral talipes equinovarus	0	6	1
HP:0001780	Abnormality of toe	0	1	1
HP:0001783	Broad metatarsal	0	1	1
HP:0001785	Ankle swelling	0	1	1
HP:0001786	Narrow foot	0	2	1
HP:0001788	Premature rupture of membranes	0	1	1
HP:0001789	Hydrops fetalis	0	21	1
HP:0001790	Nonimmune hydrops fetalis	0	2	1
HP:0001792	Small nail	0	7	1
HP:0001795	Hyperconvex nail	0	2	1
HP:0001798	Anonychia	0	6	1
HP:0001799	Short nail	0	2	1
HP:0001800	Hypoplastic toenails	0	17	1
HP:0001802	Absent toenail	0	5	1
HP:0001803	Nail pits	0	3	1
HP:0001805	Onychogryposis	0	6	1
HP:0001806	Onycholysis	0	2	1
HP:0001807	Ridged nail	0	5	1
HP:0001808	Fragile nails	0	7	1
HP:0001809	Split nail	0	1	1
HP:0001810	Dystrophic toenail	0	9	1
HP:0001814	Deep-set nails	0	2	1
HP:0001816	Thin nail	0	2	1
HP:0001817	Absent fingernail	0	8	1
HP:0001818	Paronychia	0	3	1
HP:0001820	Leukonychia	0	3	1
HP:0001821	Broad nail	0	3	1
HP:0001822	Hallux valgus	0	12	1
HP:0001829	Foot polydactyly	0	14	1
HP:0001830	Postaxial foot polydactyly	0	11	1
HP:0001831	Short toe	0	21	1
HP:0001833	Long foot	0	1	1
HP:0001836	Camptodactyly of toe	0	1	1
HP:0001837	Broad toe	0	2	1
HP:0001838	Rocker bottom foot	0	11	1
HP:0001839	Split foot	0	5	1
HP:0001840	Metatarsus adductus	0	10	1
HP:0001841	Preaxial foot polydactyly	0	5	1
HP:0001842	Foot acroosteolysis	0	1	1
HP:0001845	Overlapping toe	0	7	1
HP:0001847	Long hallux	0	2	1
HP:0001848	Calcaneovalgus deformity	0	2	1
HP:0001849	Foot oligodactyly	0	4	1
HP:0001850	Abnormality of the tarsal bones	0	1	1
HP:0001852	Sandal gap	0	18	1
HP:0001857	Short distal phalanx of toe	0	1	1
HP:0001863	Toe clinodactyly	0	4	1
HP:0001864	Clinodactyly of the 5th toe	0	2	1
HP:0001869	Deep plantar creases	0	5	1
HP:0001870	Acroosteolysis of distal phalanges (feet)	0	3	1
HP:0001872	Abnormal thrombocyte morphology	0	5	1
HP:0001873	Thrombocytopenia	0	65	1
HP:0001875	Neutropenia	0	29	1
HP:0001876	Pancytopenia	0	15	1
HP:0001877	Abnormal erythrocyte morphology	0	1	1
HP:0001879	Abnormal eosinophil morphology	0	2	1
HP:0001880	Eosinophilia	0	15	1
HP:0001881	Abnormal leukocyte morphology	0	3	1
HP:0001882	Leukopenia	0	10	1
HP:0001884	Talipes calcaneovalgus	0	2	1
HP:0001886	Foot osteomyelitis	0	1	1
HP:0001888	Lymphopenia	0	12	1
HP:0001889	Megaloblastic anemia	0	3	1
HP:0001890	Autoimmune hemolytic anemia	0	10	1
HP:0001891	Iron deficiency anemia	0	6	1
HP:0001892	Abnormal bleeding	0	17	1
HP:0001894	Thrombocytosis	0	11	1
HP:0001895	Normochromic anemia	0	2	1
HP:0001896	Reticulocytopenia	0	2	1
HP:0001897	Normocytic anemia	0	3	1
HP:0001901	Polycythemia	0	2	1
HP:0001902	Giant platelets	0	3	1
HP:0001904	Neutropenia in presence of anti-neutropil antibodies	0	7	1
HP:0001905	Congenital thrombocytopenia	0	1	1
HP:0001907	Thromboembolism	0	5	1
HP:0001908	Hypoplastic anemia	0	2	1
HP:0001909	Leukemia	0	6	1
HP:0001912	Abnormal basophil morphology	0	1	1
HP:0001913	Granulocytopenia	0	1	1
HP:0001915	Aplastic anemia	0	3	1
HP:0001917	Renal amyloidosis	0	3	1
HP:0001920	Renal artery stenosis	0	4	1
HP:0001927	Acanthocytosis	0	2	1
HP:0001928	Abnormality of coagulation	0	15	1
HP:0001929	Reduced factor XI activity	0	3	1
HP:0001931	Hypochromic anemia	0	2	1
HP:0001933	Subcutaneous hemorrhage	0	7	1
HP:0001934	Persistent bleeding after trauma	0	2	1
HP:0001935	Microcytic anemia	0	16	1
HP:0001937	Microangiopathic hemolytic anemia	0	2	1
HP:0001939	Abnormality of metabolism/homeostasis	0	10	1
HP:0001941	Acidosis	0	3	1
HP:0001944	Dehydration	0	26	1
HP:0001946	Ketosis	0	6	1
HP:0001947	Renal tubular acidosis	0	7	1
HP:0001950	Respiratory alkalosis	0	1	1
HP:0001951	Episodic ammonia intoxication	0	1	1
HP:0001952	Glucose intolerance	0	3	1
HP:0001953	Diabetic ketoacidosis	0	1	1
HP:0001954	Recurrent fever	0	10	1
HP:0001955	Unexplained fevers	0	2	1
HP:0001956	Truncal obesity	0	16	1
HP:0001958	Nonketotic hypoglycemia	0	6	1
HP:0001959	Polydipsia	0	15	1
HP:0001960	Hypokalemic metabolic alkalosis	0	2	1
HP:0001965	Abnormality of the scalp	0	2	1
HP:0001966	Mesangial abnormality	0	1	1
HP:0001970	Tubulointerstitial nephritis	0	7	1
HP:0001971	Hypersplenism	0	5	1
HP:0001972	Macrocytic anemia	0	4	1
HP:0001973	Autoimmune thrombocytopenia	0	10	1
HP:0001974	Leukocytosis	0	16	1
HP:0001977	Abnormal thrombosis	0	2	1
HP:0001978	Extramedullary hematopoiesis	0	4	1
HP:0001980	Megaloblastic bone marrow	0	4	1
HP:0001982	Sea-blue histiocytosis	0	1	1
HP:0001988	Recurrent hypoglycemia	0	6	1
HP:0001992	Organic aciduria	0	5	1
HP:0001993	Ketoacidosis	0	3	1
HP:0001994	Renal Fanconi syndrome	0	6	1
HP:0001997	Gout	0	5	1
HP:0001998	Neonatal hypoglycemia	0	16	1
HP:0002000	Short columella	0	6	1
HP:0002003	Large forehead	0	4	1
HP:0002006	Facial cleft	0	4	1
HP:0002007	Frontal bossing	0	120	1
HP:0002010	Narrow maxilla	0	1	1
HP:0002023	Anal atresia	0	34	1
HP:0002025	Anal stenosis	0	8	1
HP:0002028	Chronic diarrhea	0	15	1
HP:0002032	Esophageal atresia	0	6	1
HP:0002034	Abnormality of the rectum	0	1	1
HP:0002035	Rectal prolapse	0	4	1
HP:0002036	Hiatus hernia	0	7	1
HP:0002037	Inflammation of the large intestine	0	2	1
HP:0002038	Protein avoidance	0	1	1
HP:0002040	Esophageal varix	0	8	1
HP:0002041	Intractable diarrhea	0	1	1
HP:0002043	Esophageal stricture	0	7	1
HP:0002044	Zollinger-Ellison syndrome	0	4	1
HP:0002046	Heat intolerance	0	1	1
HP:0002049	Proximal renal tubular acidosis	0	2	1
HP:0002050	Macroorchidism, postpubertal	0	1	1
HP:0002056	Abnormality of the glabella	0	1	1
HP:0002057	Prominent glabella	0	1	1
HP:0002059	Cerebral atrophy	0	33	1
HP:0002061	Lower limb spasticity	0	20	1
HP:0002062	Morphological abnormality of the pyramidal tract	0	1	1
HP:0002063	Rigidity	0	45	1
HP:0002070	Limb ataxia	0	31	1
HP:0002071	Abnormality of extrapyramidal motor function	0	21	1
HP:0002080	Intention tremor	0	33	1
HP:0002084	Encephalocele	0	15	1
HP:0002086	Abnormality of the respiratory system	0	3	1
HP:0002088	Abnormal lung morphology	0	1	1
HP:0002091	Restrictive ventilatory defect	0	11	1
HP:0002097	Emphysema	0	17	1
HP:0002100	Recurrent aspiration pneumonia	0	4	1
HP:0002101	Abnormal lung lobation	0	9	1
HP:0002102	Pleuritis	0	4	1
HP:0002103	Abnormality of the pleura	0	7	1
HP:0002105	Hemoptysis	0	11	1
HP:0002107	Pneumothorax	0	9	1
HP:0002110	Bronchiectasis	0	11	1
HP:0002113	Pulmonary infiltrates	0	11	1
HP:0002131	Episodic ataxia	0	3	1
HP:0002132	Porencephalic cyst	0	5	1
HP:0002133	Status epilepticus	0	28	1
HP:0002134	Abnormality of the basal ganglia	0	5	1
HP:0002135	Basal ganglia calcification	0	4	1
HP:0002138	Subarachnoid hemorrhage	0	5	1
HP:0002139	Arrhinencephaly	0	10	1
HP:0002140	Ischemic stroke	0	2	1
HP:0002143	Abnormality of the spinal cord	0	4	1
HP:0002144	Tethered cord	0	2	1
HP:0002148	Hypophosphatemia	0	13	1
HP:0002152	Hyperproteinemia	0	1	1
HP:0002154	Hyperglycinemia	0	3	1
HP:0002160	Hyperhomocystinemia	0	1	1
HP:0002161	Hyperlysinemia	0	2	1
HP:0002162	Low posterior hairline	0	22	1
HP:0002164	Nail dysplasia	0	11	1
HP:0002166	Impaired vibration sensation in the lower limbs	0	25	1
HP:0002168	Scanning speech	0	5	1
HP:0002170	Intracranial hemorrhage	0	18	1
HP:0002171	Gliosis	0	6	1
HP:0002172	Postural instability	0	32	1
HP:0002173	Hypoglycemic seizures	0	7	1
HP:0002176	Spinal cord compression	0	4	1
HP:0002179	Opisthotonus	0	7	1
HP:0002180	Neurodegeneration	0	3	1
HP:0002183	Phonophobia	0	2	1
HP:0002185	Neurofibrillary tangles	0	2	1
HP:0002186	Apraxia	0	14	1
HP:0002188	Delayed CNS myelination	0	4	1
HP:0002189	Excessive daytime sleepiness	0	3	1
HP:0002190	Choroid plexus cyst	0	2	1
HP:0002195	Dysgenesis of the cerebellar vermis	0	1	1
HP:0002196	Myelopathy	0	1	1
HP:0002199	Hypocalcemic seizures	0	8	1
HP:0002200	Pseudobulbar signs	0	4	1
HP:0002202	Pleural effusion	0	12	1
HP:0002208	Coarse hair	0	14	1
HP:0002209	Sparse scalp hair	0	28	1
HP:0002211	White forelock	0	7	1
HP:0002212	Curly hair	0	6	1
HP:0002213	Fine hair	0	26	1
HP:0002215	Sparse axillary hair	0	7	1
HP:0002216	Premature graying of hair	0	17	1
HP:0002217	Slow-growing hair	0	6	1
HP:0002218	Silver-gray hair	0	1	1
HP:0002219	Facial hypertrichosis	0	1	1
HP:0002221	Absent axillary hair	0	2	1
HP:0002223	Absent eyebrow	0	9	1
HP:0002224	Woolly hair	0	10	1
HP:0002225	Sparse pubic hair	0	7	1
HP:0002226	White eyebrow	0	4	1
HP:0002227	White eyelashes	0	3	1
HP:0002229	Alopecia areata	0	3	1
HP:0002231	Sparse body hair	0	15	1
[truncated: 3,431 more rows]
